# Supplementary material
Source: Research Square preprint supplement (doi:10.21203/rs.3.rs-9138908/v1)
Supplement: Supplementary file 1 [file ce0077d08e543a1b1f30f1f8.docx]

**Supplementary Materials: Performance measures and availability of European power plants**

### Authors

Eric Jahnke*, Armin Ardone

**Affiliations**

Karlsruhe Institute of Technology (KIT), Institute for Industrial Production (IIP), Chair of Energy Economics, Hertzstr. 16, 76187 Karlsruhe, Germany

*corresponding author: Eric Jahnke (eric.jahnke@kit.edu)

**Data cleaning and pre-processing**

This section describes the various cases differentiated to cluster and label multiple overlapping outage reports with different types, reasons and updates.

*
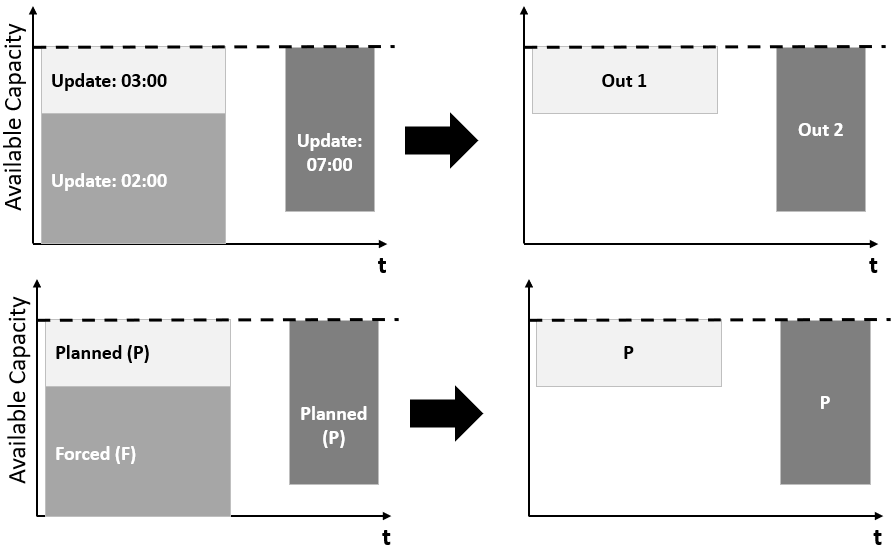
Figure 1: Most recent update between two overlapping reports*

*
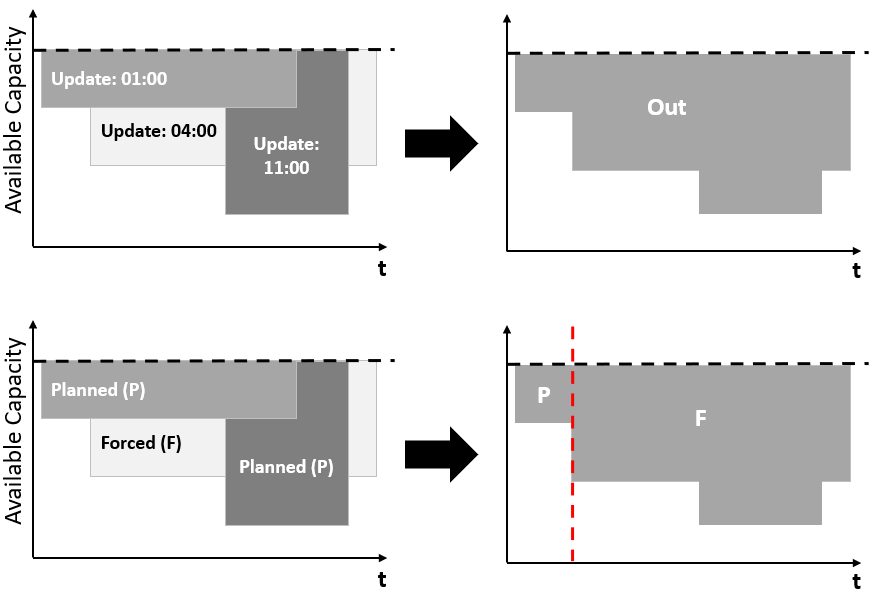
Figure 2: Start time is planned, but forced > planned for overlapping*


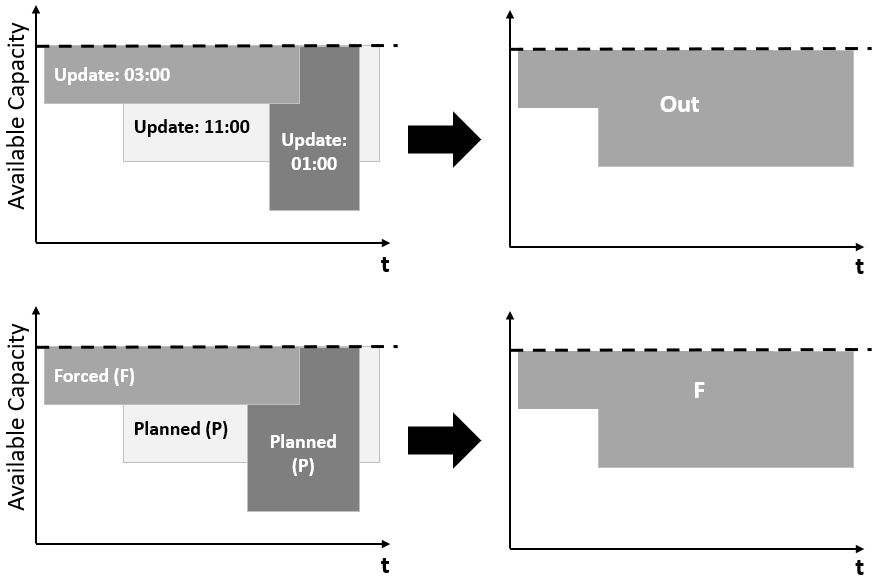


*Figure 3: Start time sets label, forced > planned for overlapping and most recent update time deletes big outage*

**Description of performance measures**

| Abbreviation | Description | Equation |
| --- | --- | --- |
| ACTH | Active hours of observation horizon per unit | Full year with observations per powerplant |
| SH | Service hours of a unit without hours in total outage | ACTH – (FOH + MOH + POH) |
| DH | Observed hours | ACTH – SOH |
| FOH | Number of hours a unit was in forced outage (excluding maintenance) |  |
| POH | Number of hours a unit was in planned outage (excluding maintenance) |  |
| MOH | Number of hours a unit was in outage due to maintenance (either planned or forced) |  |
| UOH | Number of hours a unit was in forced unplanned outage (including maintenance) |  |
| SOH | Number of hours a unit was in planned scheduled outage (including maintenance) |  |
| FDH | Number of hours a unit was in forced deration (excluding maintenance) |  |
| PDH | Number of hours a unit was planned derated (excluding maintenance) |  |
| MDH | Number of hours a unit was derated due to maintenance (either planned or forced) |  |
| UDH | Number of hours a unit was forced unplanned deration (including maintenance) |  |
| SDH | Number of hours a unit was planned scheduled derated (including maintenance) |  |

*Table 1: Description of temporal factors*

| Abbreviation | Equation |
| --- | --- |
| AF |  |
| FOF |  |
| POF |  |
| MOF |  |
| UOF |  |
| SOF |  |
| EAF |  |
| EFOF |  |
| EPOF |  |
| EMOF |  |
| EUOF |  |
| ESOF |  |

*Table 2: Performance measure factors*

| Abbreviation | Equation |
| --- | --- |
| FOR |  |
| POR |  |
| MOR |  |
| UOR |  |
| SOR |  |
| EFOR |  |
| EPOR |  |
| EMOR |  |
| EUOR |  |
| ESOR |  |
| RR_fo |  |
| FR |  |
| RR_un |  |
| UR |  |

*Table 3: Performance measure rates*

**Description of powerplant database**


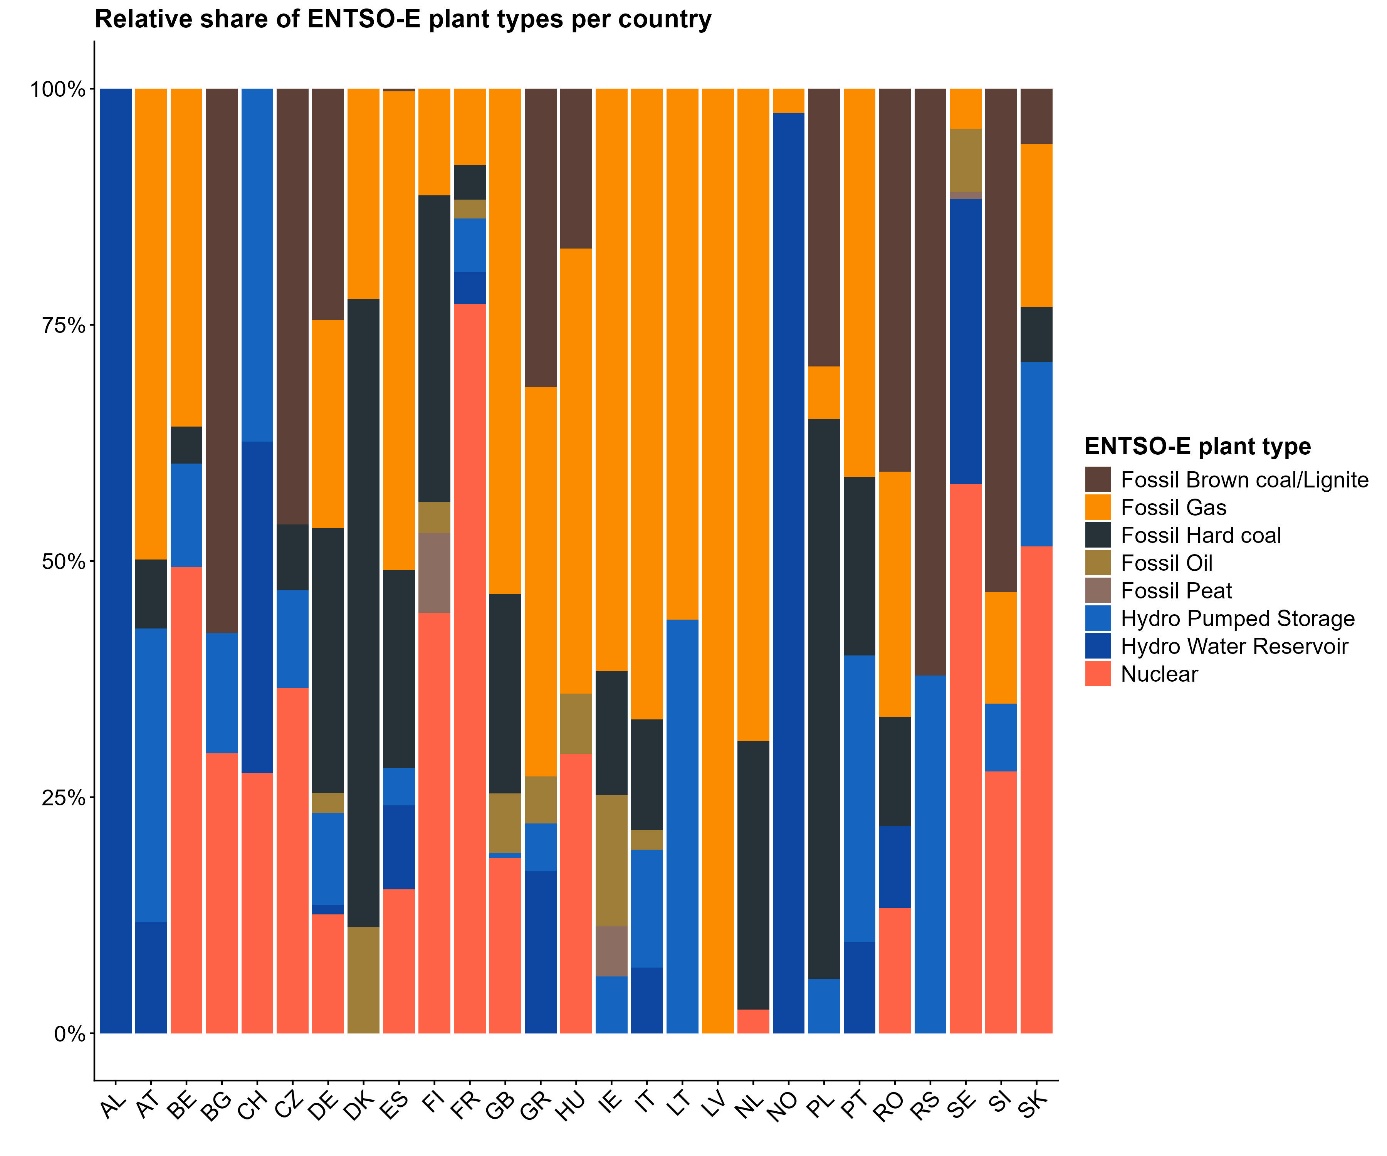


*Figure 4: Share of ENTSO-E plant type domains per country in the dataset*

| Plant type* | Country | No. units | Unit cap. [MW] | No. units [%] | Unit cap. [%] |
| --- | --- | --- | --- | --- | --- |
| Hydro Water Reservoir | AL | 14 | 1421 | 100% | 100% |
| Fossil Gas | AT | 13 | 4295.2 | 36% | 40% |
| Fossil Hard coal | AT | 3 | 915 | 8% | 9% |
| Hydro Pumped Storage | AT | 7 | 2463.8 | 19% | 23% |
| Hydro Run-of-river and poundage | AT | 9 | 2060.9 | 25% | 19% |
| Hydro Water Reservoir | AT | 4 | 935.2 | 11% | 9% |
| Biomass | BE | 1 | 268 | 3% | 2% |
| Fossil Gas | BE | 17 | 4281.7 | 49% | 35% |
| Fossil Hard coal | BE | 2 | 470 | 6% | 4% |
| Hydro Pumped Storage | BE | 7 | 1308 | 20% | 11% |
| Nuclear | BE | 8 | 5919 | 23% | 48% |
| Fossil Brown coal/Lignite | BG | 18 | 3888 | 75% | 57% |
| Hydro Pumped Storage | BG | 4 | 908 | 17% | 13% |
| Nuclear | BG | 2 | 2000 | 8% | 29% |
| Hydro Pumped Storage | CH | 13 | 4471 | 38% | 36% |
| Hydro Run-of-river and poundage | CH | 2 | 220 | 6% | 2% |
| Hydro Water Reservoir | CH | 14 | 4288 | 41% | 35% |
| Nuclear | CH | 5 | 3373 | 15% | 27% |
| Fossil Brown coal/Lignite | CZ | 20 | 4191 | 56% | 42% |
| Fossil Hard coal | CZ | 4 | 748 | 11% | 8% |
| Hydro Pumped Storage | CZ | 6 | 1110 | 17% | 11% |
| Nuclear | CZ | 6 | 3936 | 17% | 39% |
| Fossil Brown coal/Lignite | DE | 43 | 21017 | 16% | 24% |
| Fossil Coal-derived gas | DE | 7 | 1140 | 3% | 1% |
| Fossil Gas | DE | 70 | 18979 | 26% | 21% |
| Fossil Hard coal | DE | 59 | 24090 | 22% | 27% |
| Fossil Oil | DE | 12 | 1674 | 5% | 2% |
| Hydro Pumped Storage | DE | 49 | 7110 | 19% | 8% |
| Hydro Run-of-river and poundage | DE | 2 | 246 | 1% | 0% |
| Hydro Water Reservoir | DE | 7 | 860 | 3% | 1% |
| Nuclear | DE | 9 | 12085 | 3% | 14% |
| Waste | DE | 1 | 109 | 0% | 0% |
| Fossil Gas | DK | 4 | 1315.2 | 25% | 24% |
| Fossil Hard coal | DK | 10 | 3772 | 63% | 67% |
| Fossil Oil | DK | 2 | 520 | 13% | 9% |
| Fossil Oil shale | EE | 12 | 1981 | 100% | 100% |
| Fossil Brown coal/Lignite | ES | 1 | 142.3 | 0% | 0% |
| Fossil Gas | ES | 73 | 25176.3 | 32% | 48% |
| Fossil Hard coal | ES | 30 | 10414.8 | 13% | 20% |
| Hydro Pumped Storage | ES | 11 | 1950.9 | 5% | 4% |
| Hydro Water Reservoir | ES | 34 | 5485.8 | 15% | 10% |
| Nuclear | ES | 8 | 7572.4 | 4% | 14% |
| Biomass | FI | 1 | 125 | 2% | 1% |
| Fossil Gas | FI | 12 | 1105 | 28% | 11% |
| Fossil Hard coal | FI | 16 | 3169 | 37% | 32% |
| Fossil Oil | FI | 2 | 326 | 5% | 3% |
| Fossil Peat | FI | 5 | 820 | 12% | 8% |
| Nuclear | FI | 7 | 4352 | 16% | 44% |
| Fossil Gas | FR | 20 | 6583 | 13% | 7% |
| Fossil Hard coal | FR | 13 | 4810 | 8% | 5% |
| Fossil Oil | FR | 20 | 6668 | 13% | 8% |
| Hydro Pumped Storage | FR | 27 | 4861 | 17% | 6% |
| Hydro Run-of-river and poundage | FR | 3 | 333 | 2% | 0% |
| Hydro Water Reservoir | FR | 14 | 2037 | 9% | 2% |
| Nuclear | FR | 58 | 63130 | 37% | 71% |
| Biomass | GB | 3 | 1935 | 1% | 3% |
| Fossil Gas | GB | 81 | 36488 | 38% | 47% |
| Fossil Hard coal | GB | 30 | 14829 | 14% | 19% |
| Fossil Oil | GB | 23 | 4186 | 11% | 5% |
| Hydro Pumped Storage | GB | 3 | 399 | 1% | 1% |
| Hydro Run-of-river and poundage | GB | 49 | 7846 | 23% | 10% |
| Nuclear | GB | 22 | 12638 | 10% | 16% |
| Fossil Brown coal/Lignite | GR | 17 | 4411 | 30% | 31% |
| Fossil Gas | GR | 17 | 5756 | 30% | 41% |
| Fossil Oil | GR | 4 | 698 | 7% | 5% |
| Hydro Pumped Storage | GR | 4 | 699 | 7% | 5% |
| Hydro Run-of-river and poundage | GR | 2 | 69 | 4% | 1% |
| Hydro Water Reservoir | GR | 12 | 2404 | 21% | 17% |
| Biomass | HU | 2 | 106 | 4% | 2% |
| Fossil Brown coal/Lignite | HU | 12 | 1089 | 25% | 17% |
| Fossil Gas | HU | 23 | 3070.2 | 48% | 47% |
| Fossil Oil | HU | 3 | 410 | 6% | 6% |
| Nuclear | HU | 8 | 1899.4 | 17% | 29% |
| Fossil Gas | IE | 21 | 4180 | 42% | 59% |
| Fossil Hard coal | IE | 3 | 855 | 6% | 12% |
| Fossil Oil | IE | 8 | 1326 | 16% | 19% |
| Fossil Peat | IE | 3 | 344 | 6% | 5% |
| Hydro Pumped Storage | IE | 4 | 292 | 8% | 4% |
| Hydro Run-of-river and poundage | IE | 11 | 151 | 22% | 2% |
| Biomass | IT | 4 | 150 | 1% | 0% |
| Fossil Gas | IT | 117 | 39530 | 24% | 54% |
| Fossil Hard coal | IT | 25 | 7911 | 5% | 11% |
| Fossil Oil | IT | 25 | 5448 | 5% | 7% |
| Geothermal | IT | 3 | 93 | 1% | 0% |
| Hydro Pumped Storage | IT | 17 | 6600 | 4% | 9% |
| Hydro Run-of-river and poundage | IT | 200 | 7541 | 41% | 10% |
| Hydro Water Reservoir | IT | 57 | 3696 | 12% | 5% |
| Fossil Gas | LT | 6 | 1755 | 60% | 66% |
| Hydro Pumped Storage | LT | 4 | 900 | 40% | 34% |
| Fossil Gas | LV | 4 | 881 | 80% | 90% |
| Hydro Run-of-river and poundage | LV | 1 | 100 | 20% | 10% |
| Fossil Gas | NL | 36 | 14039 | 75% | 65% |
| Fossil Hard coal | NL | 11 | 7203 | 23% | 33% |
| Nuclear | NL | 1 | 492 | 2% | 2% |
| Fossil Gas | NO | 23 | 525 | 5% | 3% |
| Hydro Run-of-river and poundage | NO | 14 | 210.5 | 3% | 1% |
| Hydro Water Reservoir | NO | 434 | 20593.2 | 92% | 97% |
| Biomass | PL | 1 | 225 | 1% | 1% |
| Fossil Brown coal/Lignite | PL | 31 | 9278 | 23% | 32% |
| Fossil Gas | PL | 5 | 1572 | 4% | 5% |
| Fossil Hard coal | PL | 79 | 16186 | 59% | 56% |
| Hydro Pumped Storage | PL | 18 | 1706 | 13% | 6% |
| Fossil Gas | PT | 10 | 3828 | 13% | 33% |
| Fossil Hard coal | PT | 6 | 1756 | 8% | 15% |
| Hydro Pumped Storage | PT | 20 | 2843 | 27% | 24% |
| Hydro Run-of-river and poundage | PT | 32 | 2436 | 43% | 21% |
| Hydro Water Reservoir | PT | 7 | 897 | 9% | 8% |
| Fossil Brown coal/Lignite | RO | 14 | 4011 | 33% | 41% |
| Fossil Gas | RO | 16 | 2626.1 | 38% | 27% |
| Fossil Hard coal | RO | 6 | 1150 | 14% | 12% |
| Hydro Water Reservoir | RO | 4 | 674.8 | 10% | 7% |
| Nuclear | RO | 2 | 1354.5 | 5% | 14% |
| Fossil Brown coal/Lignite | RS | 4 | 1007 | 29% | 34% |
| Hydro Pumped Storage | RS | 2 | 614 | 14% | 21% |
| Hydro Run-of-river and poundage | RS | 6 | 1098.9 | 43% | 37% |
| Biomass | SE | 1 | 106 | 2% | 1% |
| Fossil Gas | SE | 3 | 698 | 5% | 4% |
| Fossil Oil | SE | 7 | 1370 | 12% | 8% |
| Fossil Peat | SE | 1 | 120 | 2% | 1% |
| Hydro Water Reservoir | SE | 29 | 4658 | 51% | 28% |
| Nuclear | SE | 16 | 9525 | 28% | 58% |
| Fossil Brown coal/Lignite | SI | 7 | 1351 | 39% | 49% |
| Fossil Gas | SI | 5 | 297 | 28% | 11% |
| Hydro Pumped Storage | SI | 1 | 180 | 6% | 7% |
| Hydro Run-of-river and poundage | SI | 4 | 242 | 22% | 9% |
| Nuclear | SI | 1 | 696 | 6% | 25% |
| Fossil Brown coal/Lignite | SK | 4 | 440 | 18% | 11% |
| Fossil Gas | SK | 2 | 577.6 | 9% | 15% |
| Fossil Hard coal | SK | 2 | 220 | 9% | 6% |
| Hydro Pumped Storage | SK | 6 | 734.4 | 27% | 19% |
| Nuclear | SK | 8 | 1940 | 36% | 50% |

**NAs, Others, undefined Hydro or RES were ignored in this table*

*Table 4: Descriptive statistics of plant types in ENTSO-E domain per country of the merged power plant database.*


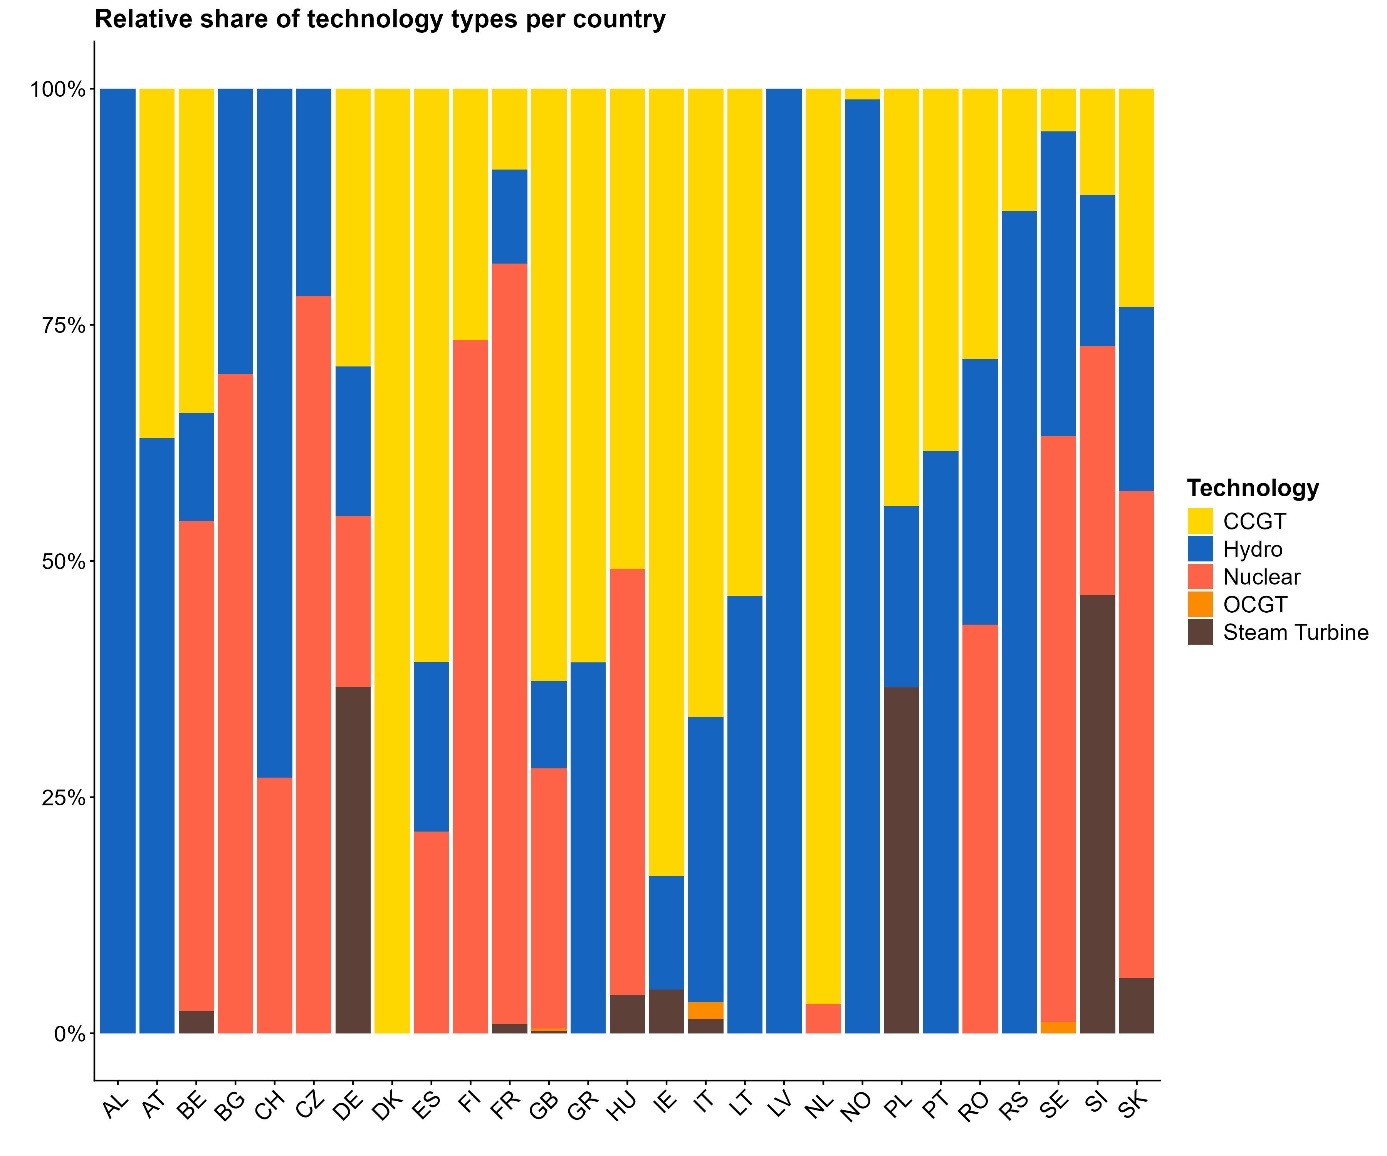


*Figure 5: Share of technology types per country in the dataset*[[1]](#footnote-1)

| Technology* | Country | No. units | Unit cap. [MW] | No. units [%] | Unit cap. [%] |
| --- | --- | --- | --- | --- | --- |
| Hydro | AL | 14 | 1421 | 100% | 100% |
| CCGT | AT | 10 | 3502.2 | 28% | 33% |
| Hydro | AT | 20 | 5459.9 | 56% | 51% |
| CCGT | BE | 16 | 3905.3 | 46% | 32% |
| Hydro | BE | 7 | 1308 | 20% | 11% |
| Nuclear | BE | 8 | 5919 | 23% | 48% |
| Steam Turbine | BE | 1 | 268 | 3% | 2% |
| Hydro | BG | 4 | 908 | 17% | 13% |
| Nuclear | BG | 2 | 2000 | 8% | 29% |
| Hydro | CH | 29 | 8979 | 85% | 73% |
| Nuclear | CH | 5 | 3373 | 15% | 27% |
| Hydro | CZ | 6 | 1110 | 17% | 11% |
| Nuclear | CZ | 6 | 3936 | 17% | 39% |
| CCGT | DE | 62 | 17676 | 23% | 20% |
| Hydro | DE | 58 | 8216 | 22% | 9% |
| Nuclear | DE | 9 | 12085 | 3% | 14% |
| Steam Turbine | DE | 45 | 21658 | 17% | 24% |
| CCGT | DK | 2 | 500.2 | 13% | 9% |
| CCGT | ES | 63 | 21513.3 | 27% | 41% |
| Hydro | ES | 45 | 7436.7 | 20% | 14% |
| Nuclear | ES | 8 | 7572.4 | 4% | 14% |
| Reservoir | ES | 74 | 1913.3 | 32% | 4% |
| CCGT | FI | 16 | 1576 | 37% | 16% |
| Nuclear | FI | 7 | 4352 | 16% | 44% |
| CCGT | FR | 21 | 6691 | 14% | 8% |
| Hydro | FR | 44 | 7231 | 28% | 8% |
| Nuclear | FR | 58 | 63130 | 37% | 71% |
| Steam Turbine | FR | 5 | 796 | 3% | 1% |
| CCGT | GB | 61 | 28782 | 29% | 37% |
| Hydro | GB | 52 | 8245 | 25% | 11% |
| Nuclear | GB | 22 | 12638 | 10% | 16% |
| OCGT | GB | 1 | 140 | 1% | 0% |
| Steam Turbine | GB | 2 | 100 | 1% | 0% |
| CCGT | GR | 13 | 4910 | 23% | 35% |
| Hydro | GR | 18 | 3172 | 32% | 23% |
| CCGT | HU | 18 | 2196 | 38% | 33% |
| Nuclear | HU | 8 | 1899.4 | 17% | 29% |
| Steam Turbine | HU | 1 | 170 | 2% | 3% |
| CCGT | IE | 19 | 4388 | 38% | 61% |
| Hydro | IE | 15 | 443 | 30% | 6% |
| Steam Turbine | IE | 4 | 208 | 8% | 3% |
| CCGT | IT | 128 | 40107 | 27% | 54% |
| Hydro | IT | 274 | 17837 | 57% | 24% |
| OCGT | IT | 8 | 1188 | 2% | 2% |
| Steam Turbine | IT | 5 | 871 | 1% | 1% |
| CCGT | LT | 5 | 1645 | 50% | 62% |
| Hydro | LT | 4 | 900 | 40% | 34% |
| Hydro | LV | 1 | 100 | 20% | 10% |
| CCGT | NL | 40 | 16613 | 83% | 76% |
| Nuclear | NL | 1 | 492 | 2% | 2% |
| CCGT | NO | 5 | 230 | 1% | 1% |
| Hydro | NO | 448 | 20803.7 | 95% | 98% |
| CCGT | PL | 16 | 3865 | 12% | 13% |
| Hydro | PL | 18 | 1706 | 13% | 6% |
| Steam Turbine | PL | 15 | 3159 | 11% | 11% |
| CCGT | PT | 10 | 3828 | 13% | 33% |
| Hydro | PT | 59 | 6176 | 79% | 53% |
| CCGT | RO | 4 | 857 | 10% | 9% |
| Hydro | RO | 4 | 674.8 | 10% | 7% |
| Nuclear | RO | 2 | 1354.5 | 5% | 14% |
| CCGT | RS | 2 | 255 | 14% | 9% |
| Hydro | RS | 8 | 1712.9 | 57% | 58% |
| CCGT | SE | 3 | 698 | 5% | 4% |
| Hydro | SE | 29 | 4658 | 51% | 28% |
| Nuclear | SE | 16 | 9525 | 28% | 58% |
| OCGT | SE | 3 | 440 | 5% | 3% |
| CCGT | SI | 5 | 297 | 28% | 11% |
| Hydro | SI | 5 | 422 | 28% | 15% |
| Nuclear | SI | 1 | 696 | 6% | 25% |
| Steam Turbine | SI | 6 | 1226 | 33% | 44% |
| CCGT | SK | 4 | 797.6 | 18% | 20% |
| Hydro | SK | 6 | 734.4 | 27% | 19% |
| Nuclear | SK | 8 | 1940 | 36% | 50% |
| Steam Turbine | SK | 4 | 440 | 18% | 11% |

**NAs were ignored in this table.*

*Table 5: Descriptive statistics of technology types per country of the merged power plant database.*

**Data overview**

The following section contains an illustrative overview of figures showing descriptive statistics for the calculated performance measures.


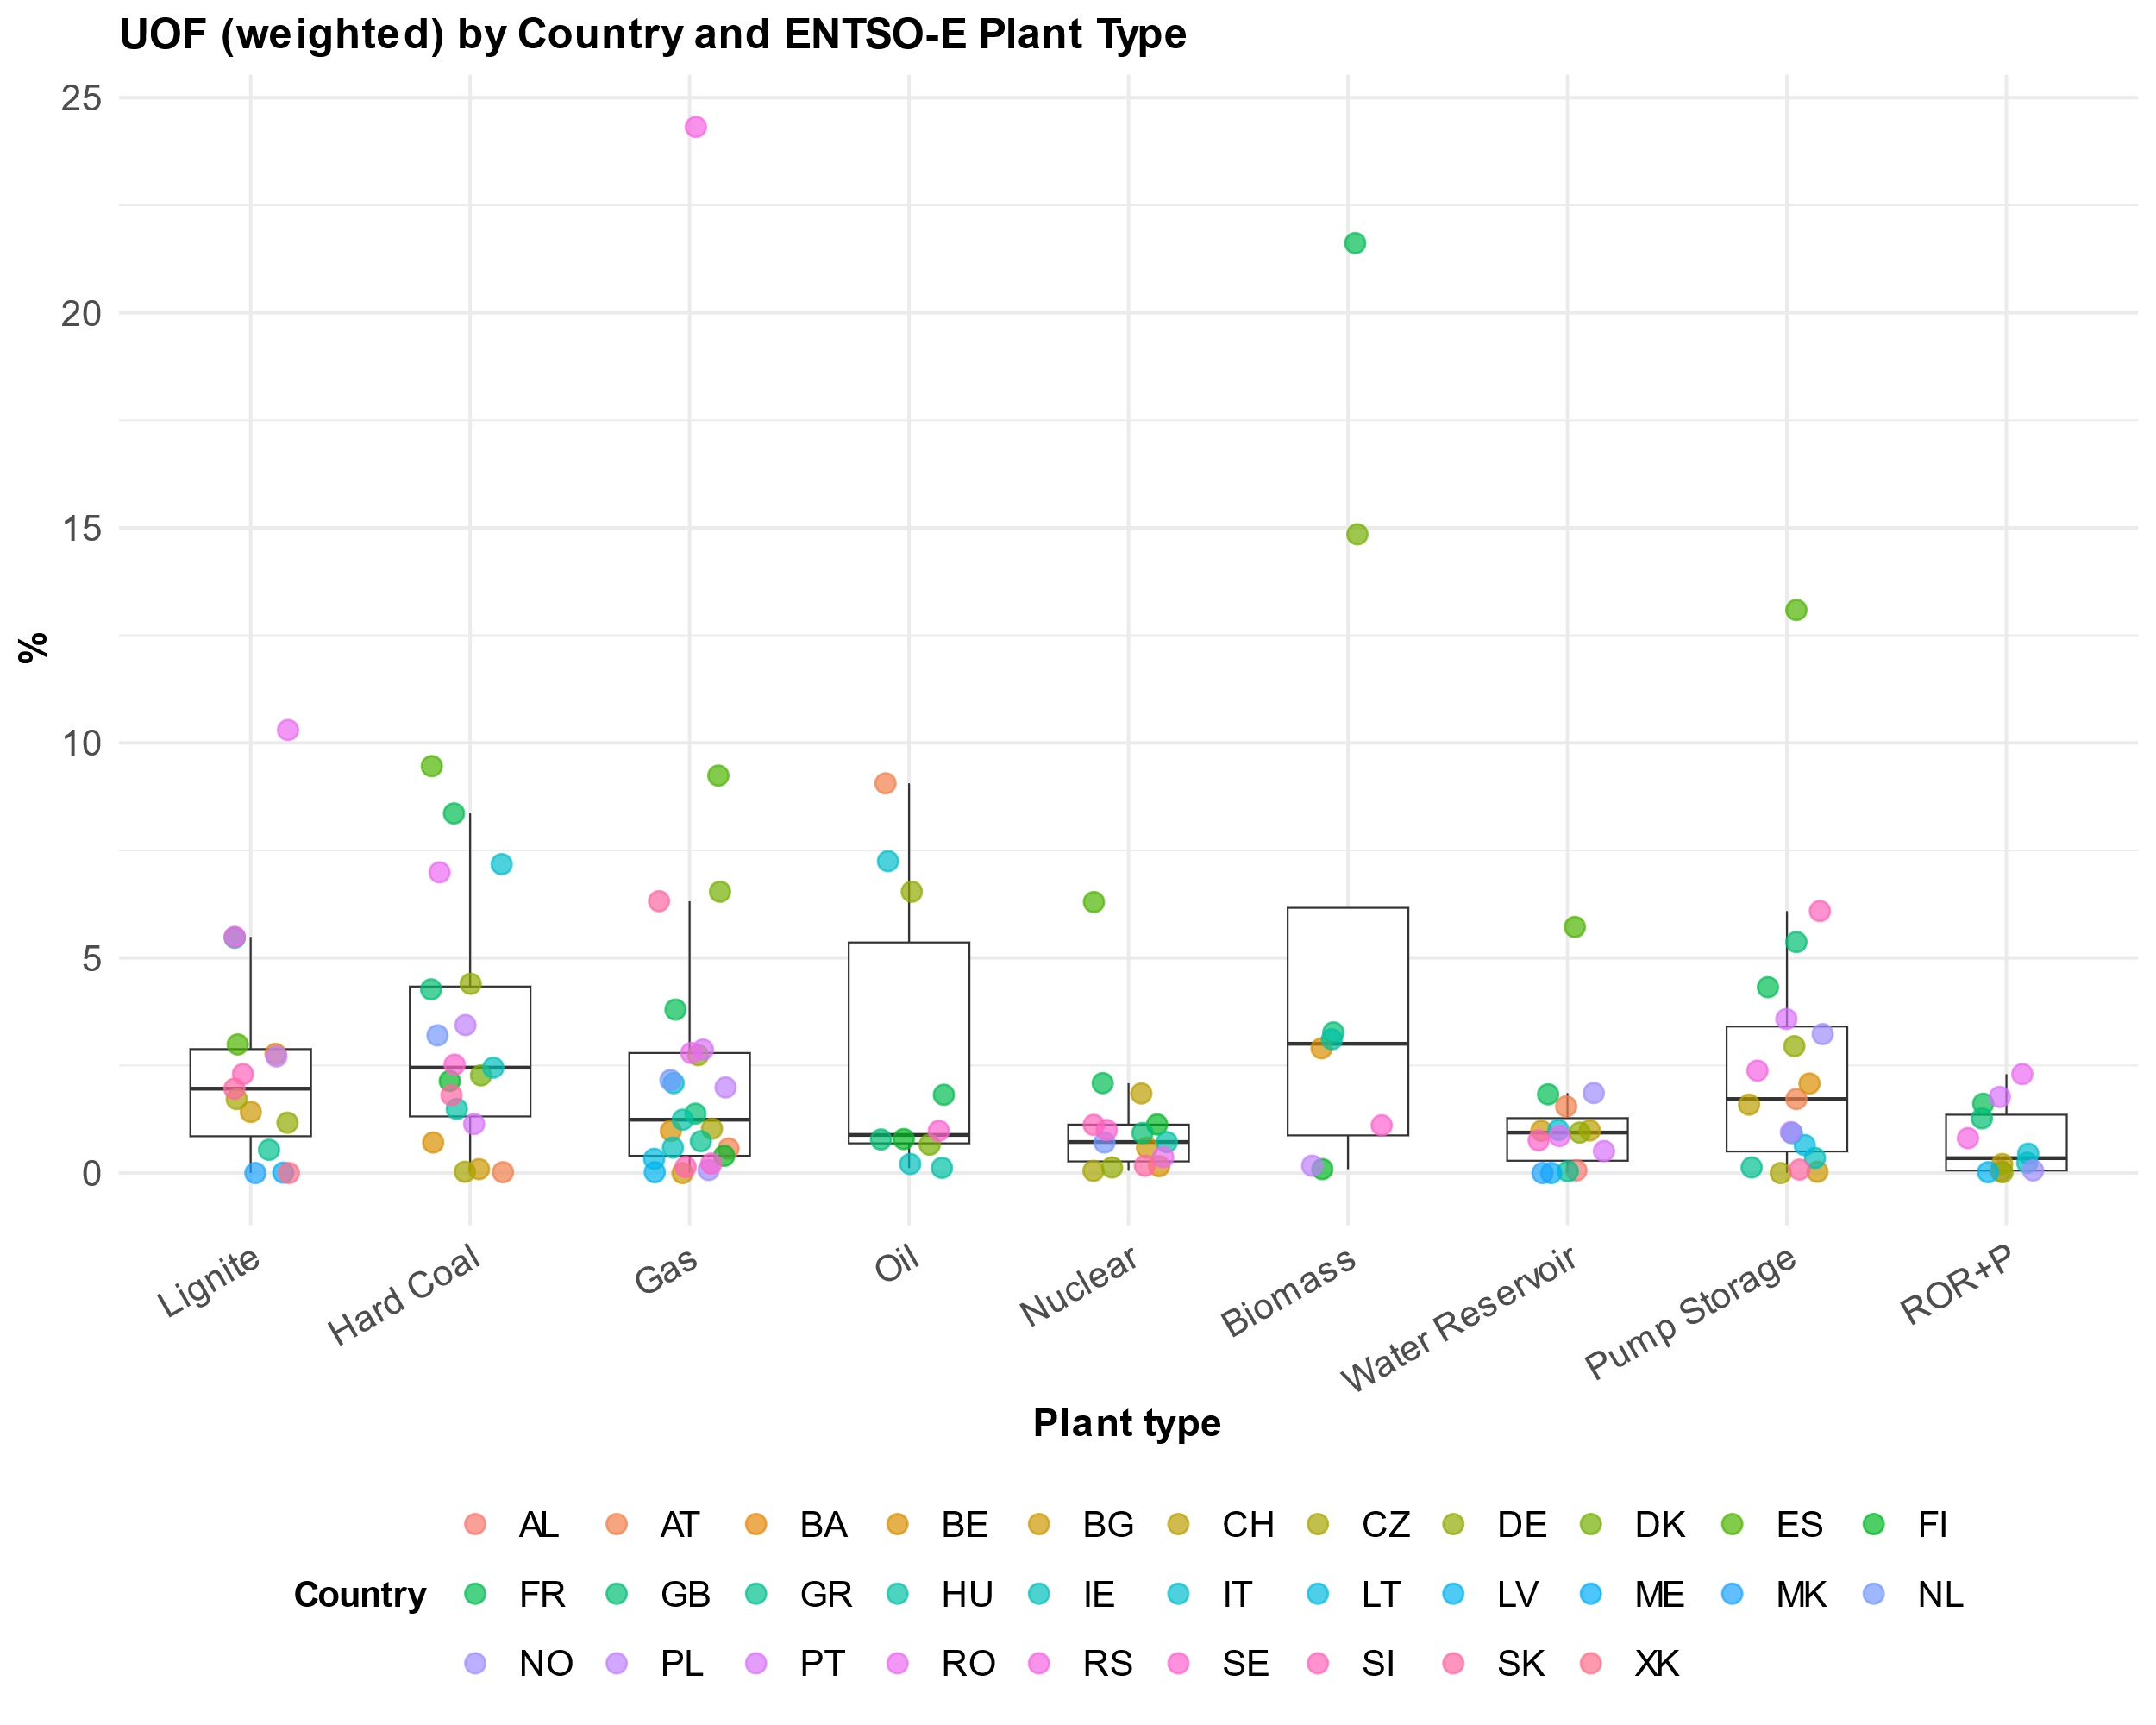


*Figure 6: Distribution of weighted unplanned outage factors for plant types and countries of the data set*


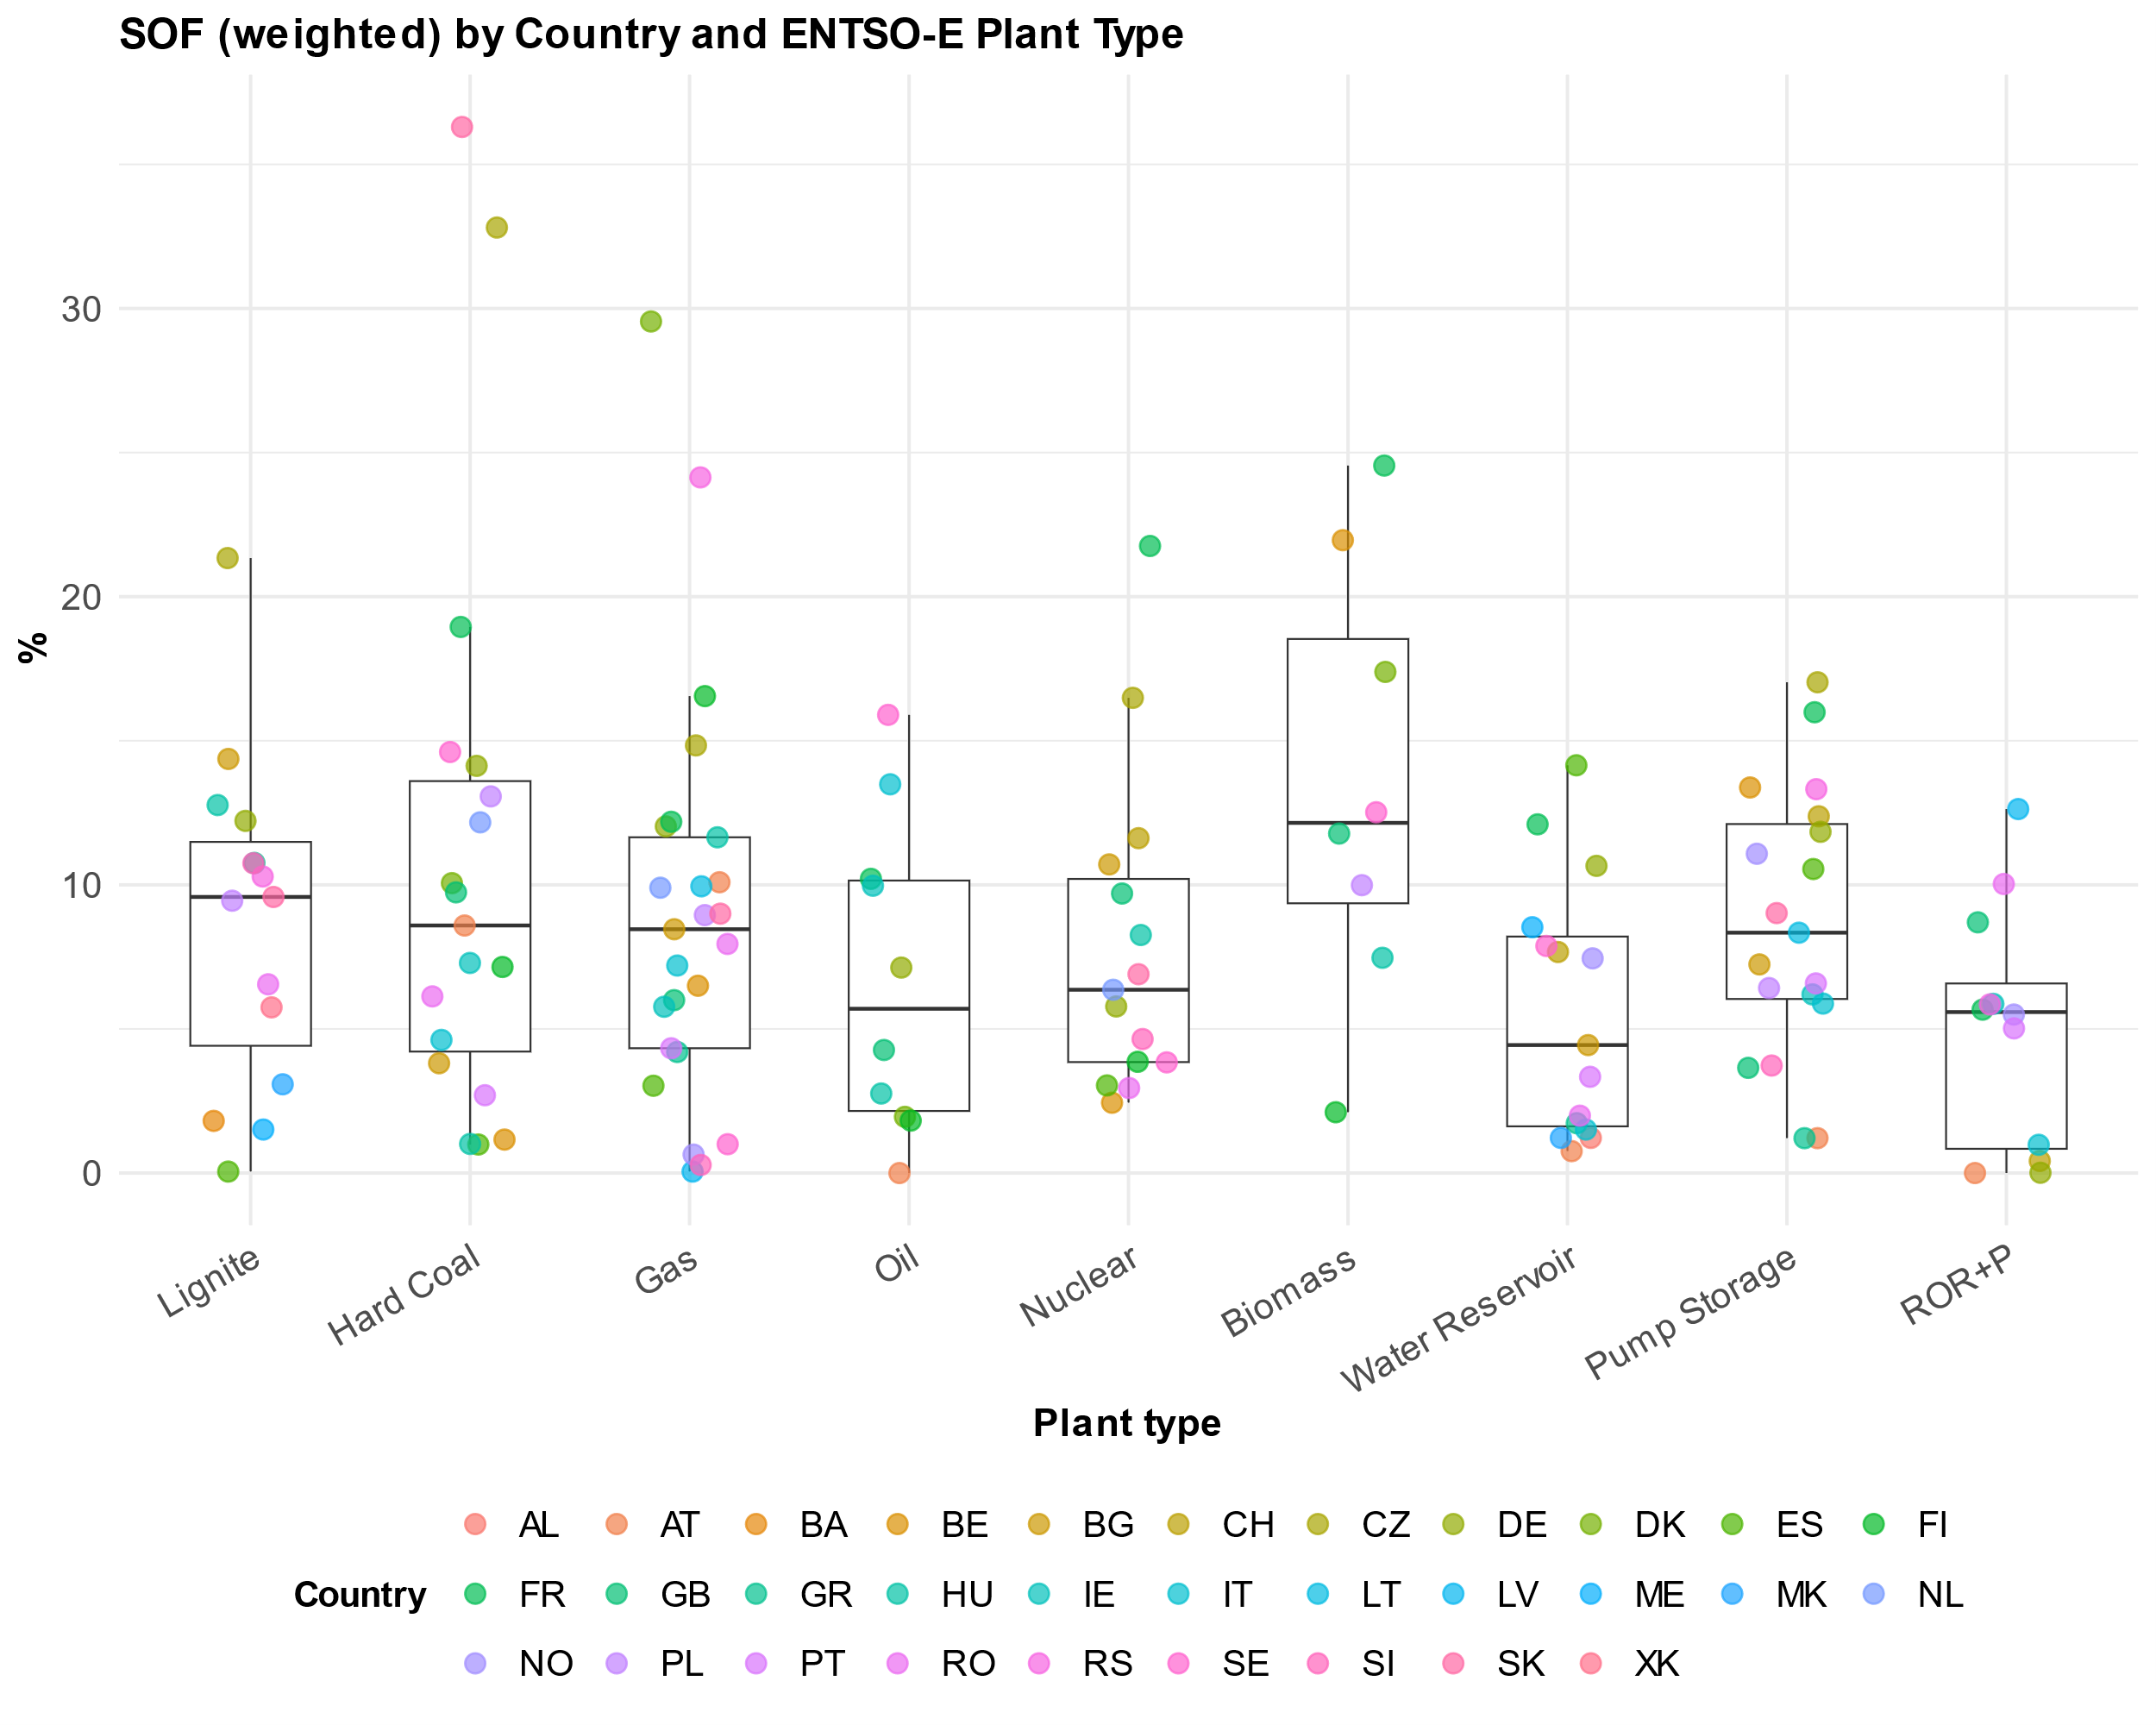


*Figure 7: Distribution of weighted scheduled outage factors for plant types and countries of the data set*


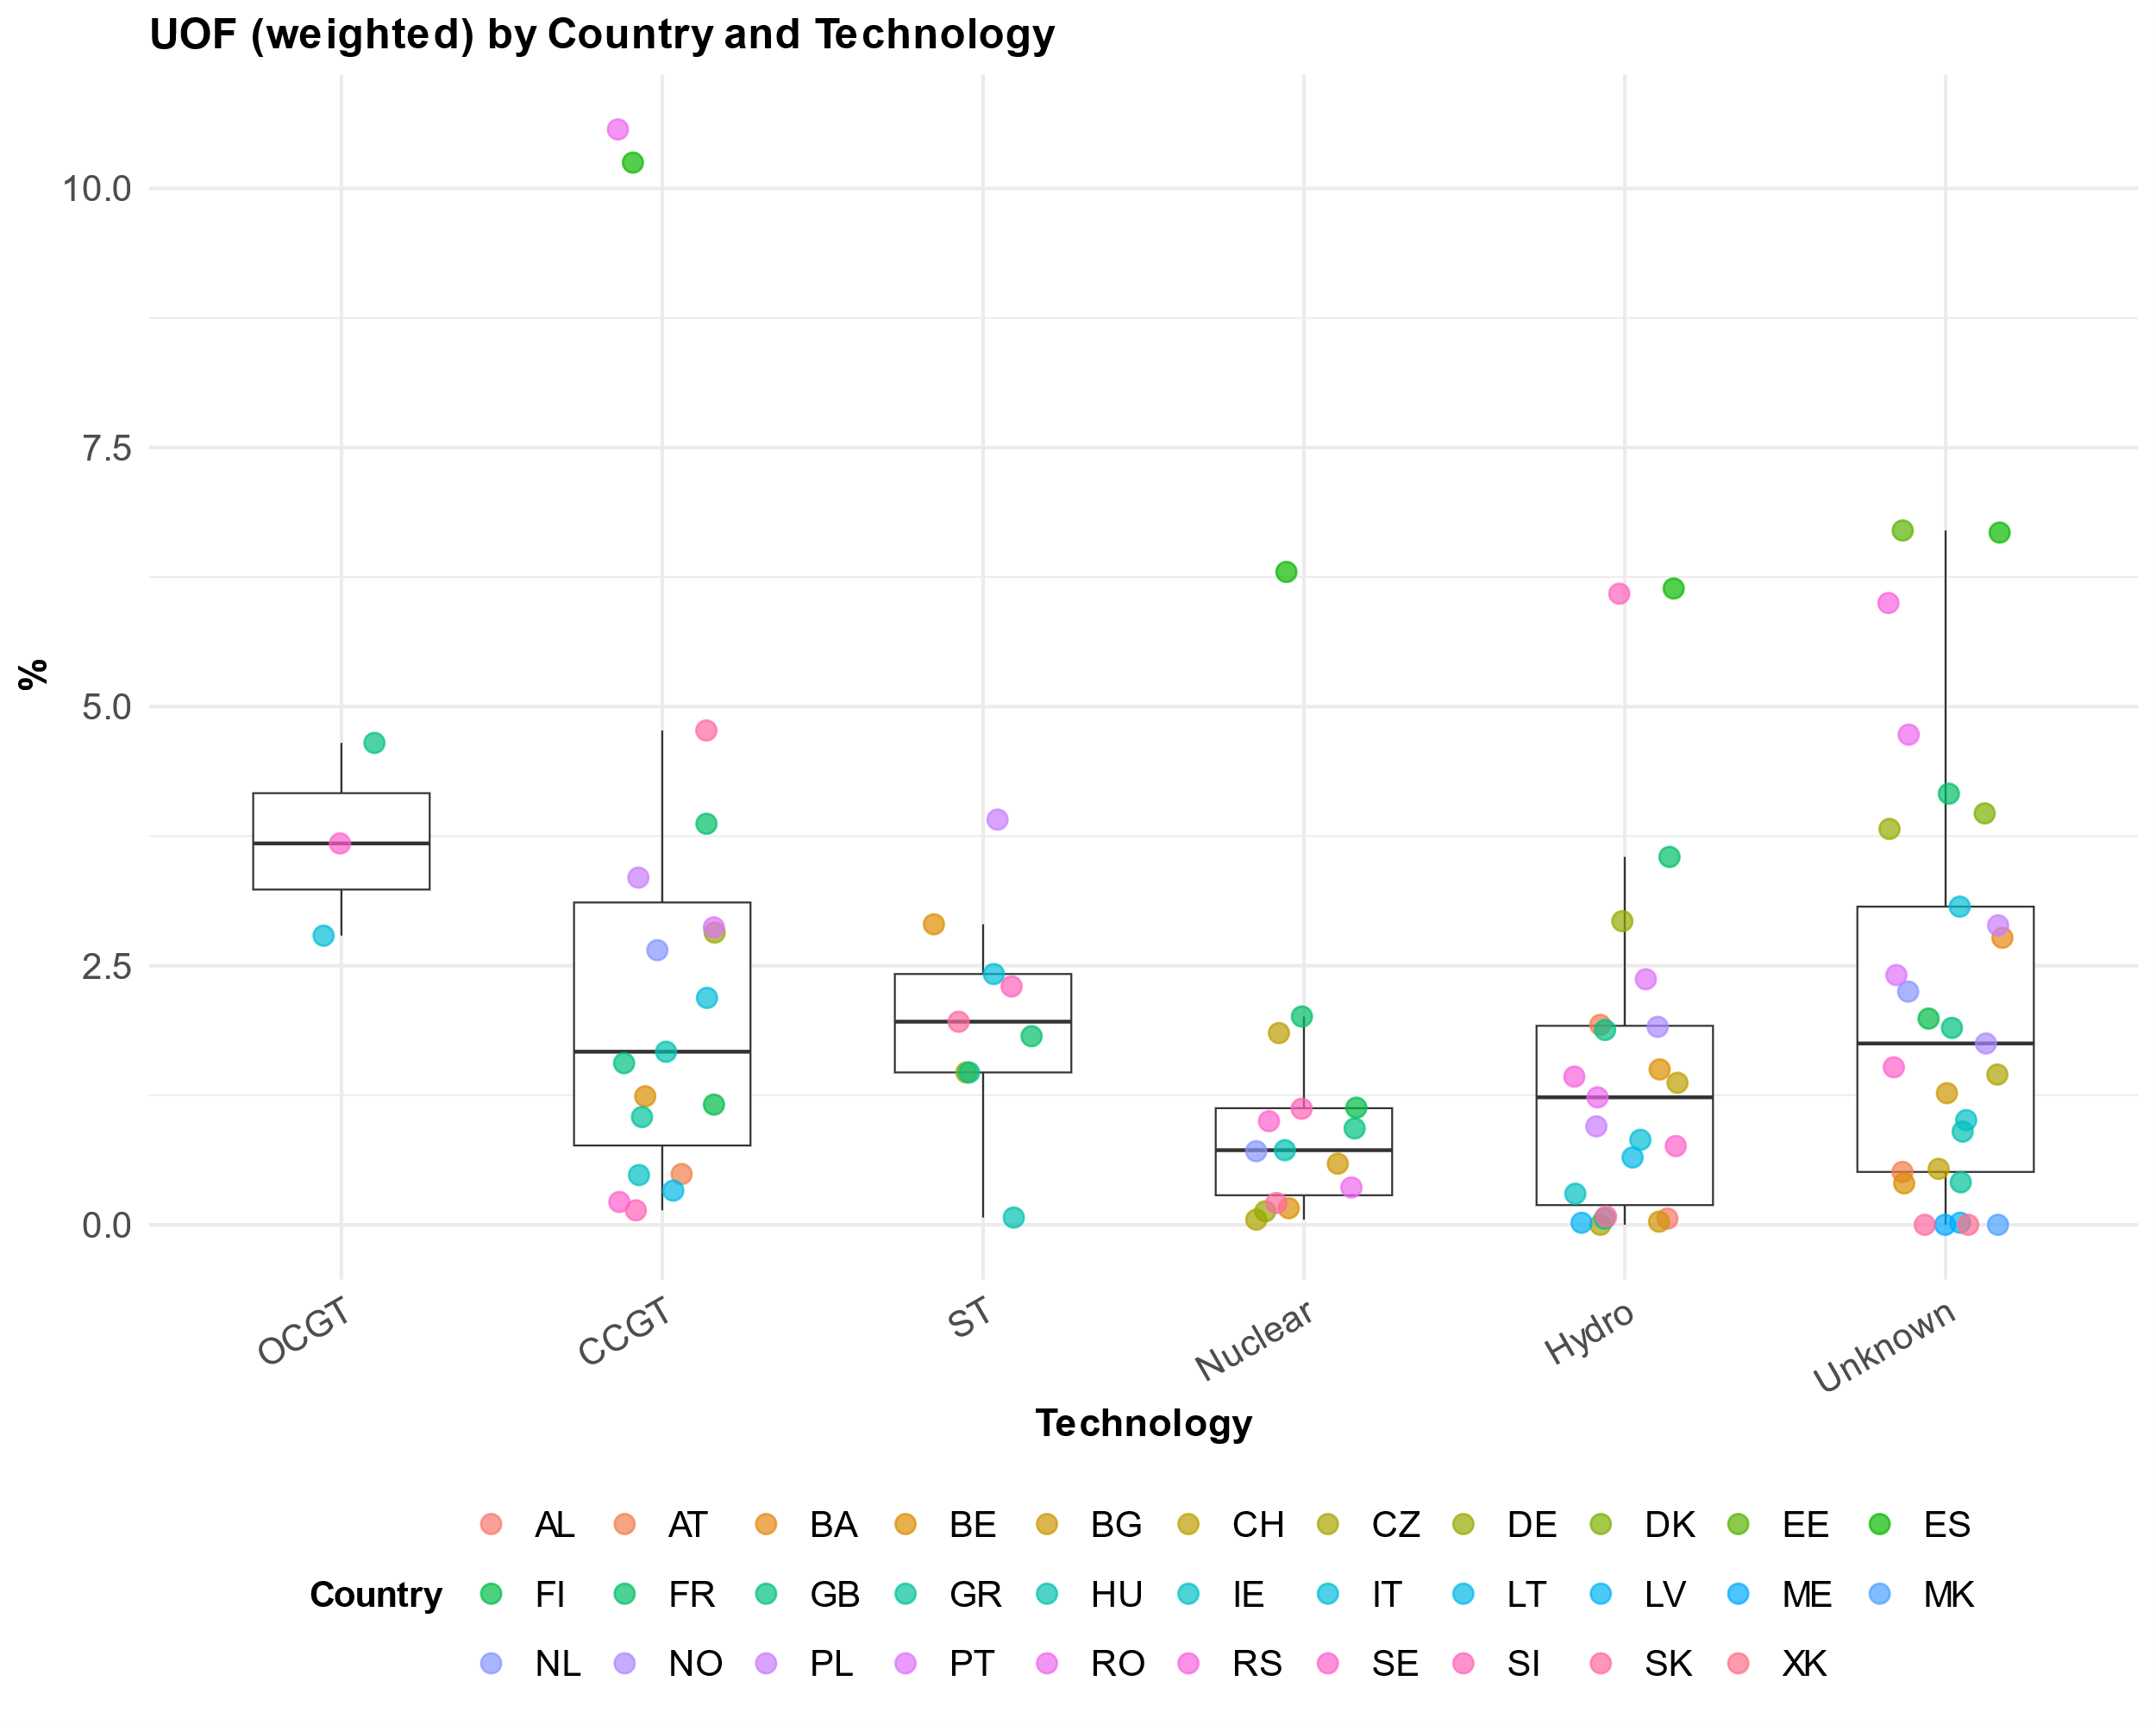


*Figure 8: Distribution of weighted unplanned outage factors for plant technologies and countries of the data set*


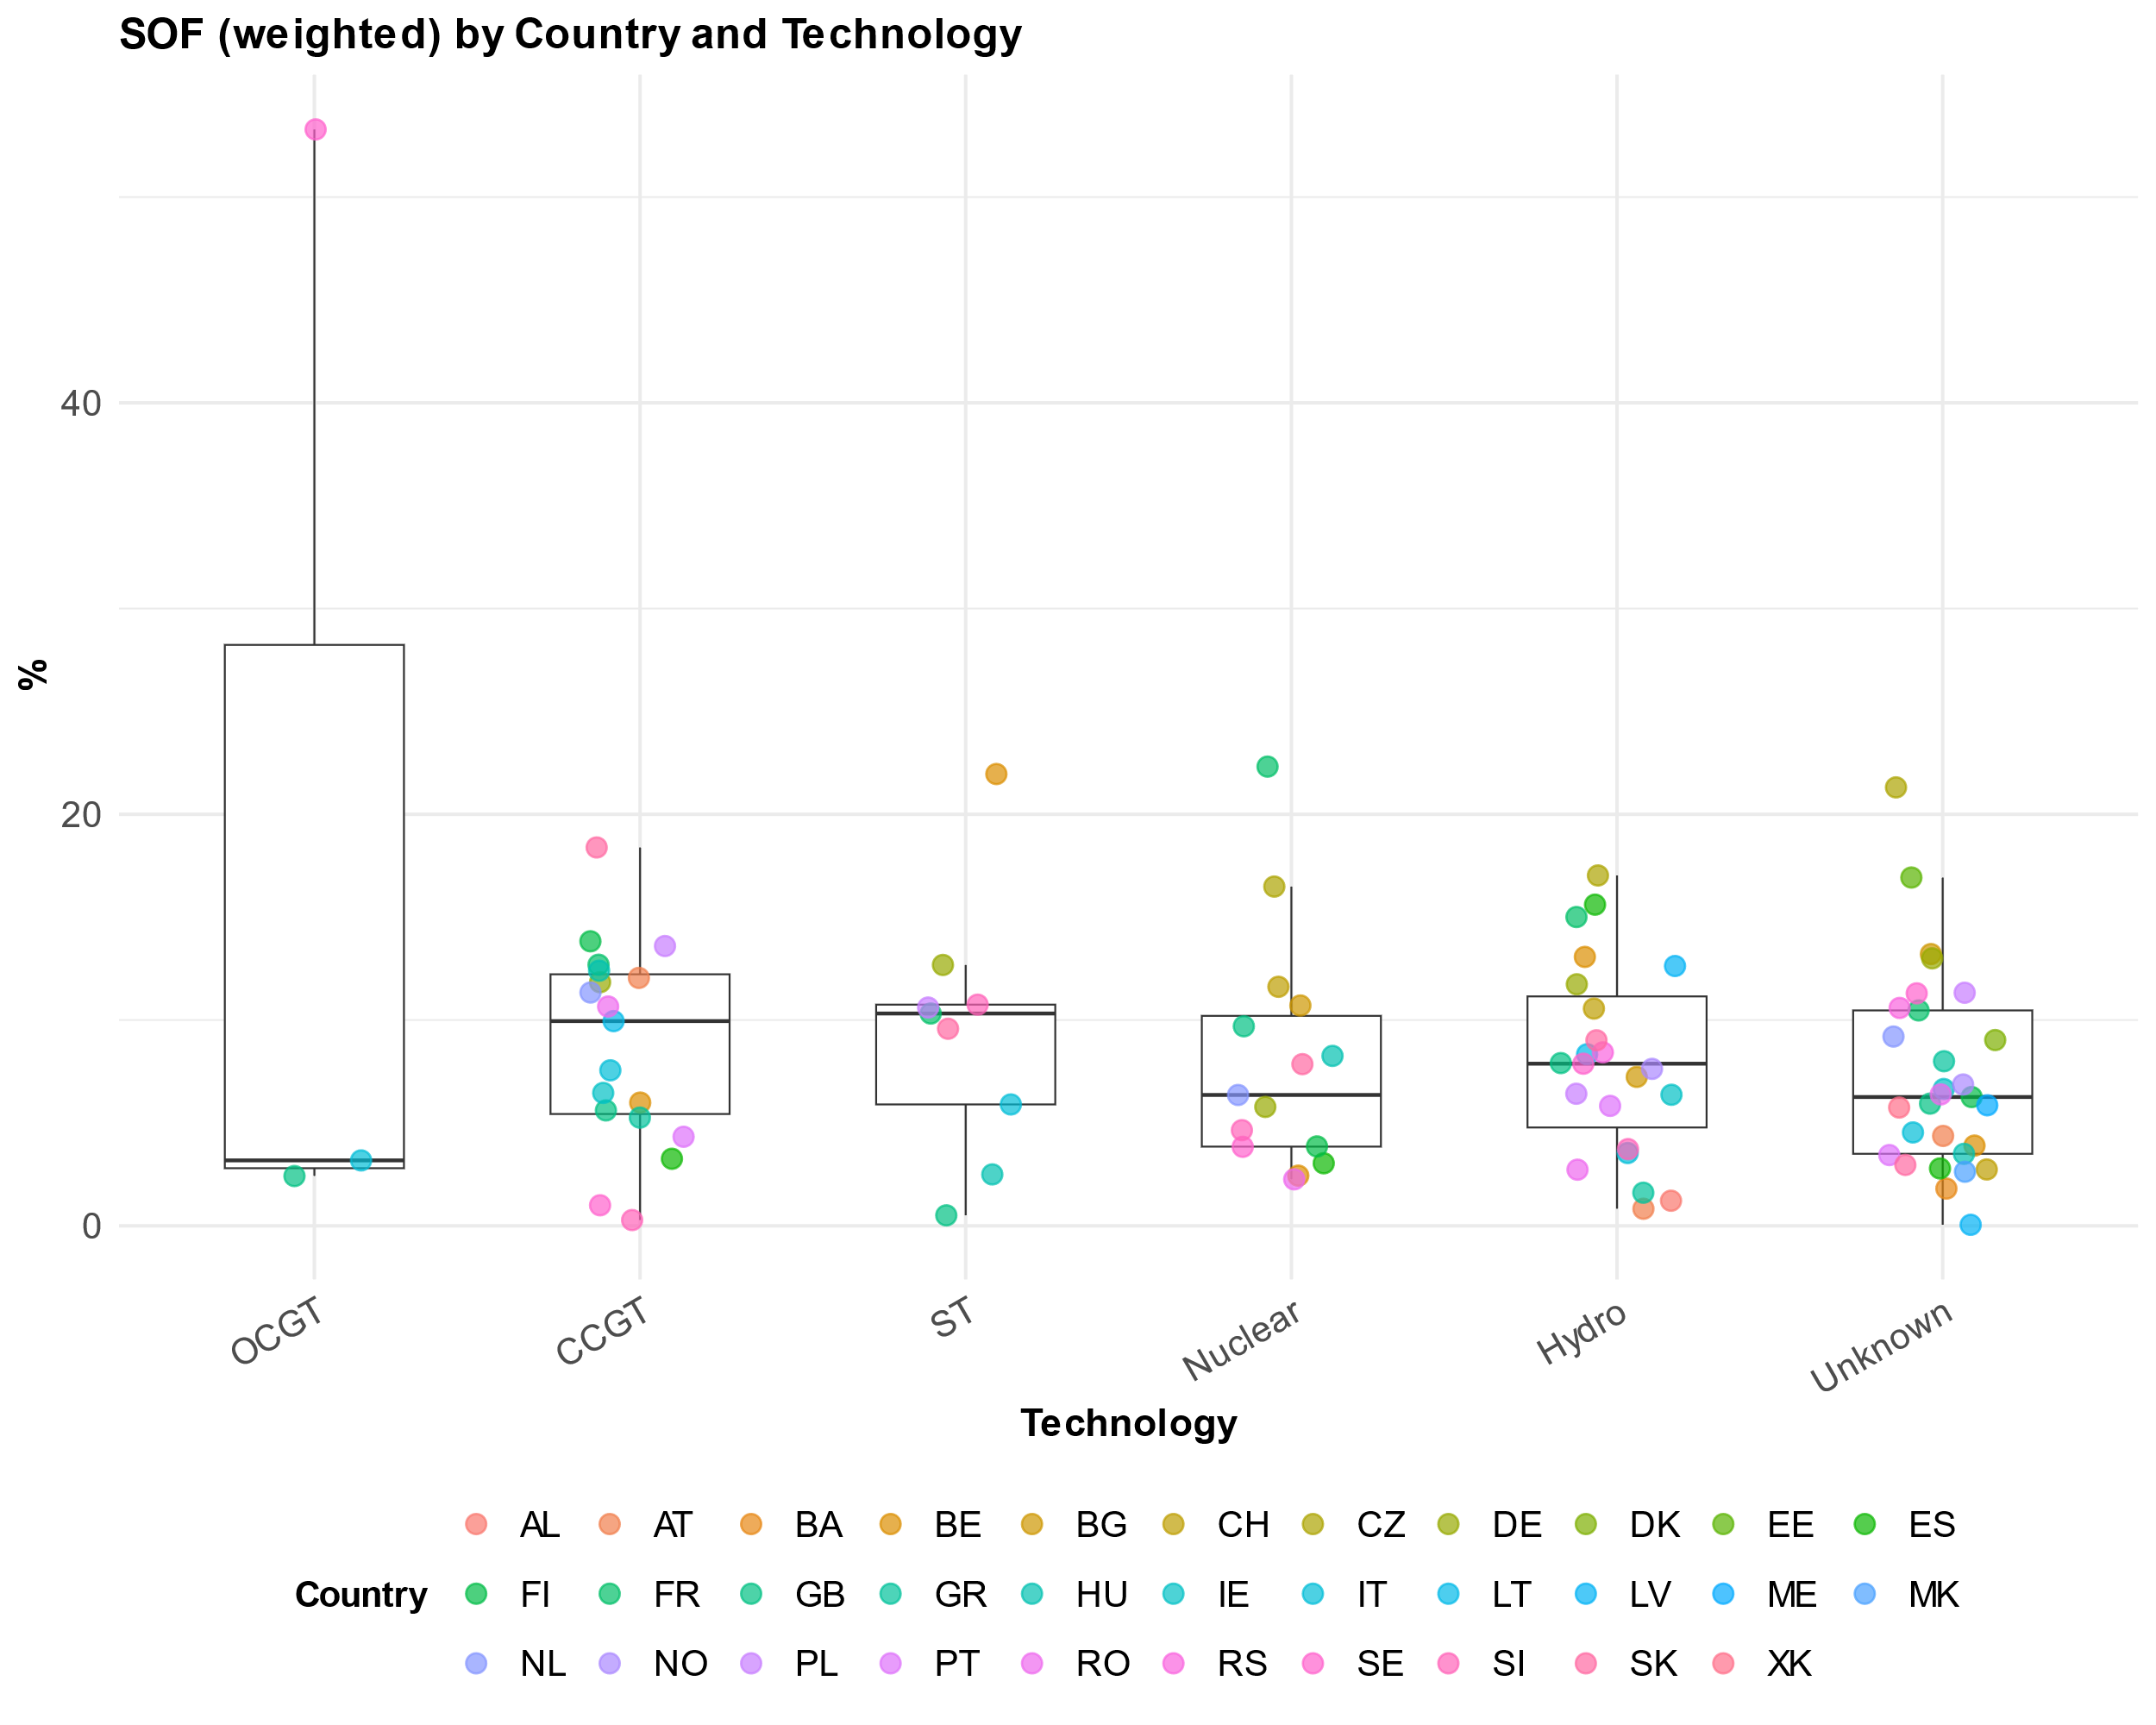


*Figure 9: Distribution of weighted scheduled outage factors for plant technologies and countries of the data set*


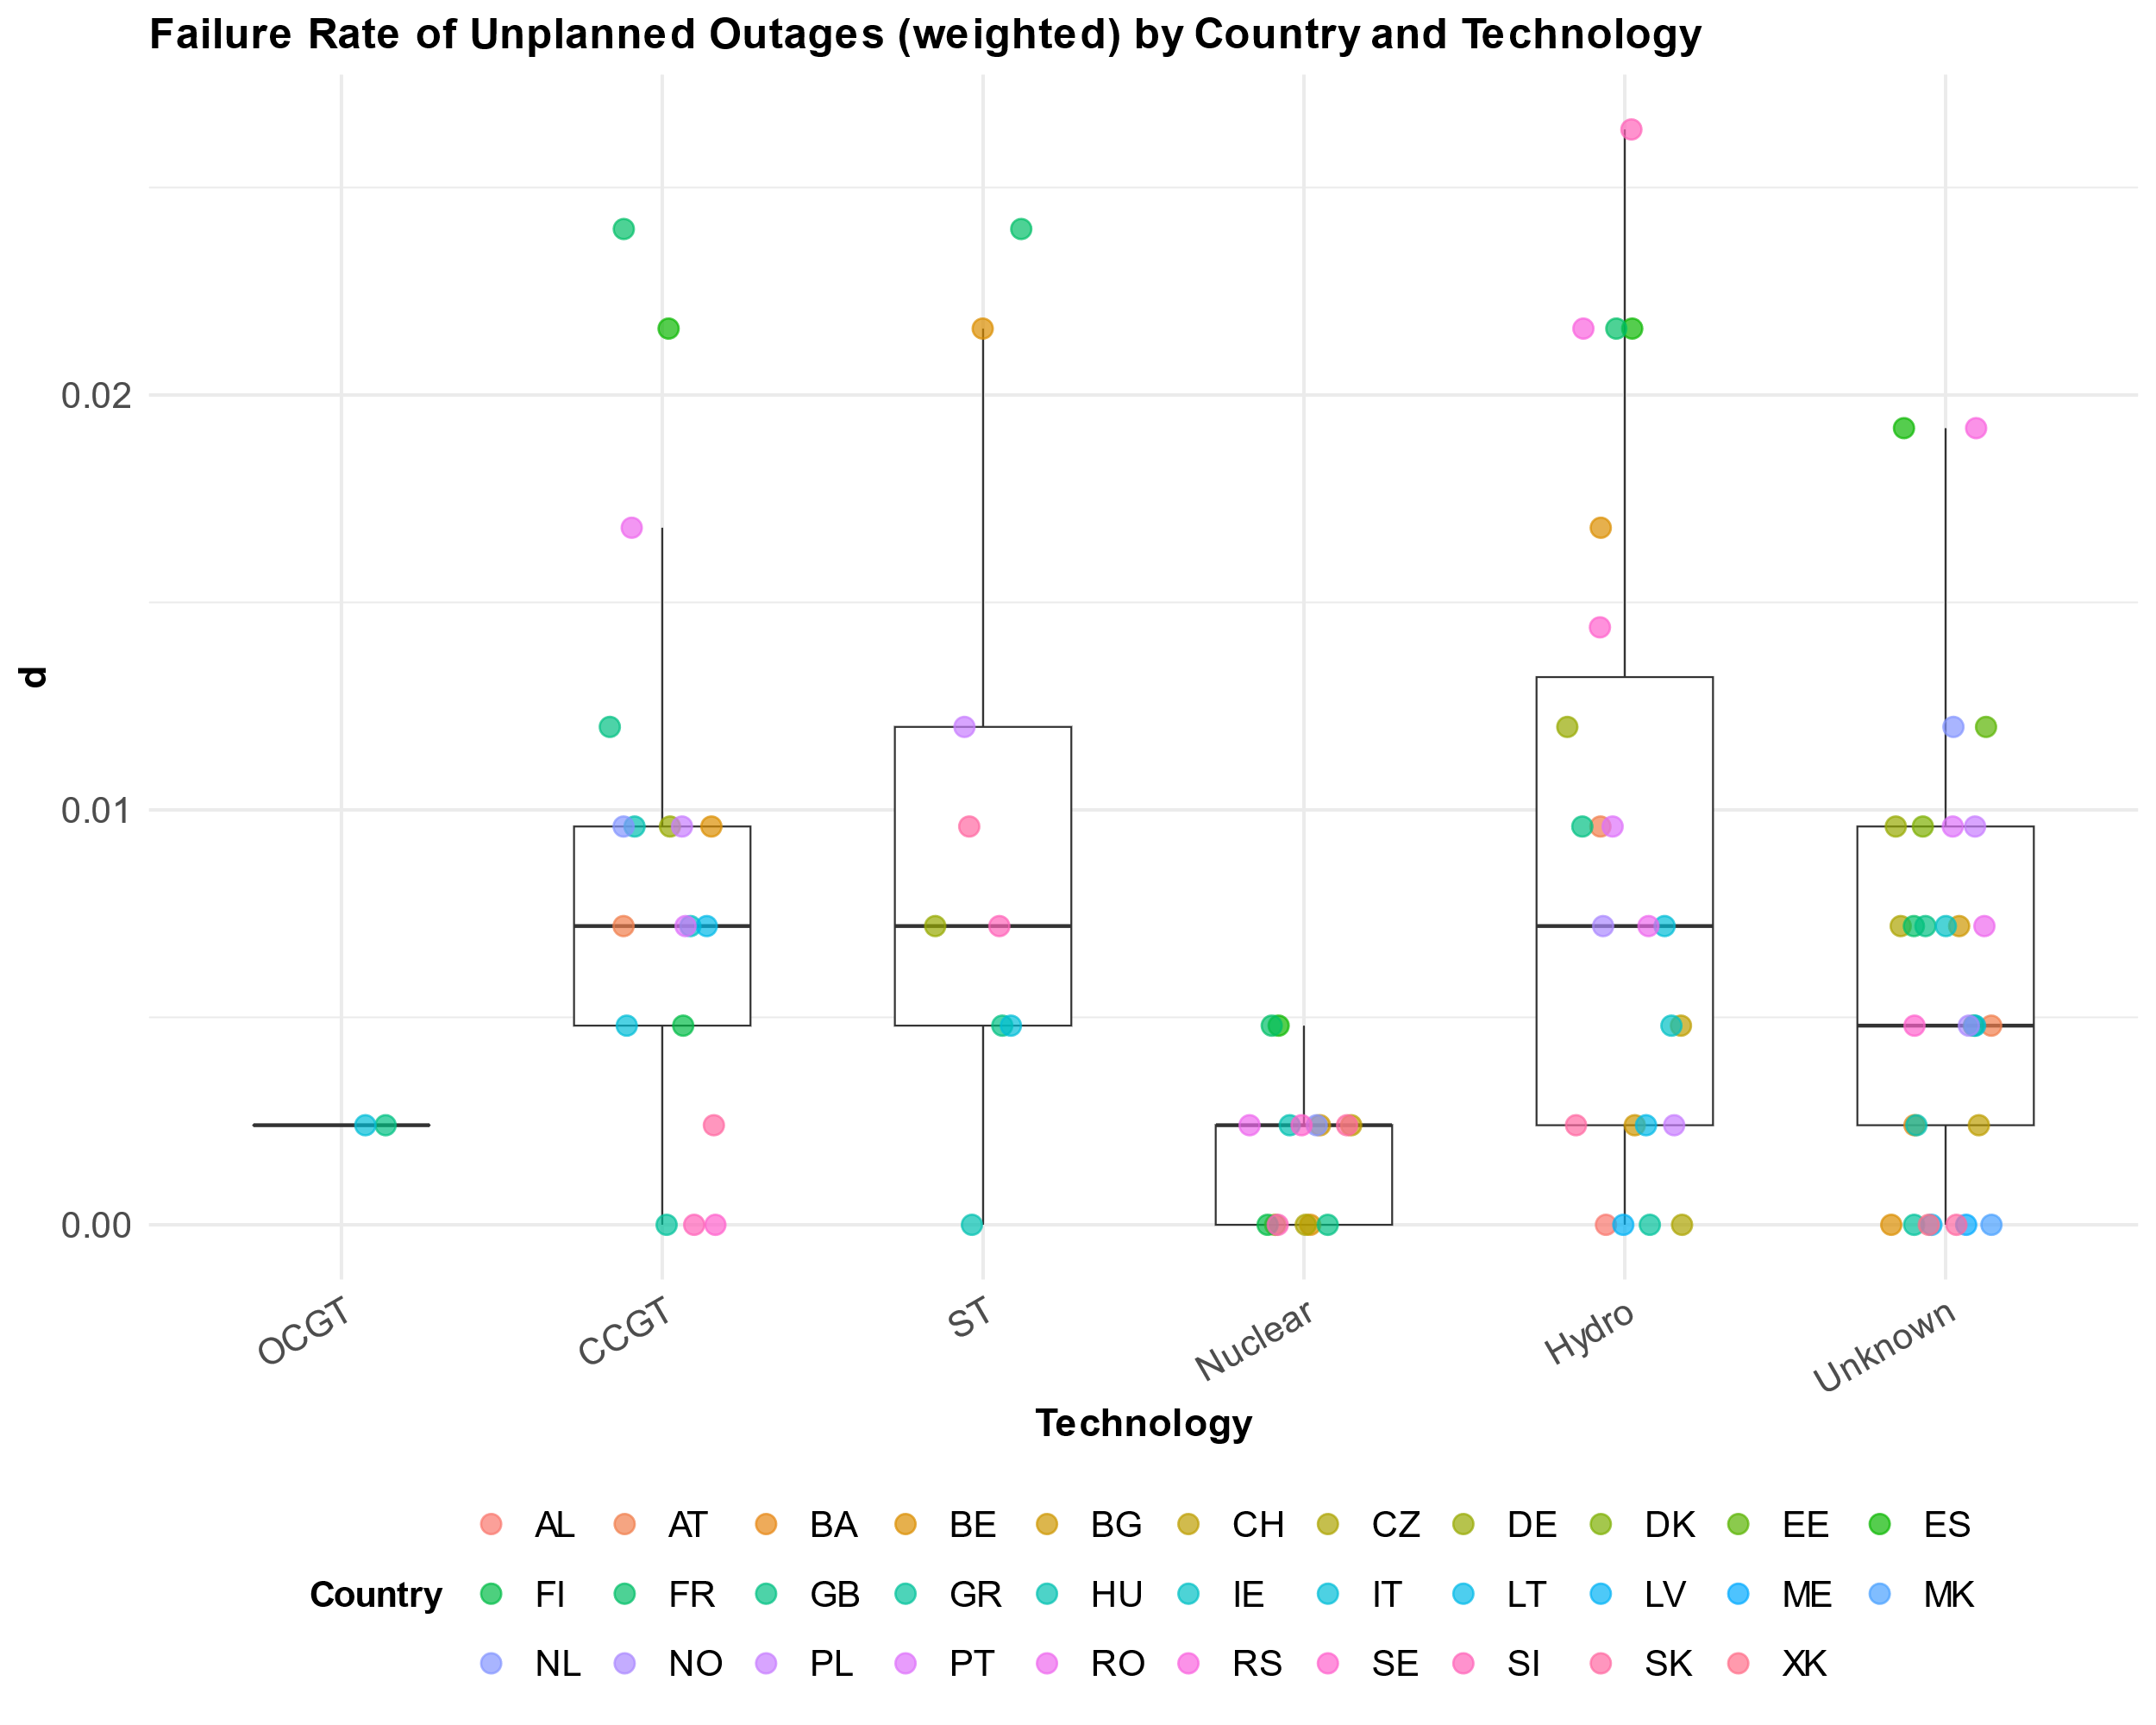


*Figure 10: Distribution of weighted failure rates by unplanned outages for plant technologies and countries of the data set*


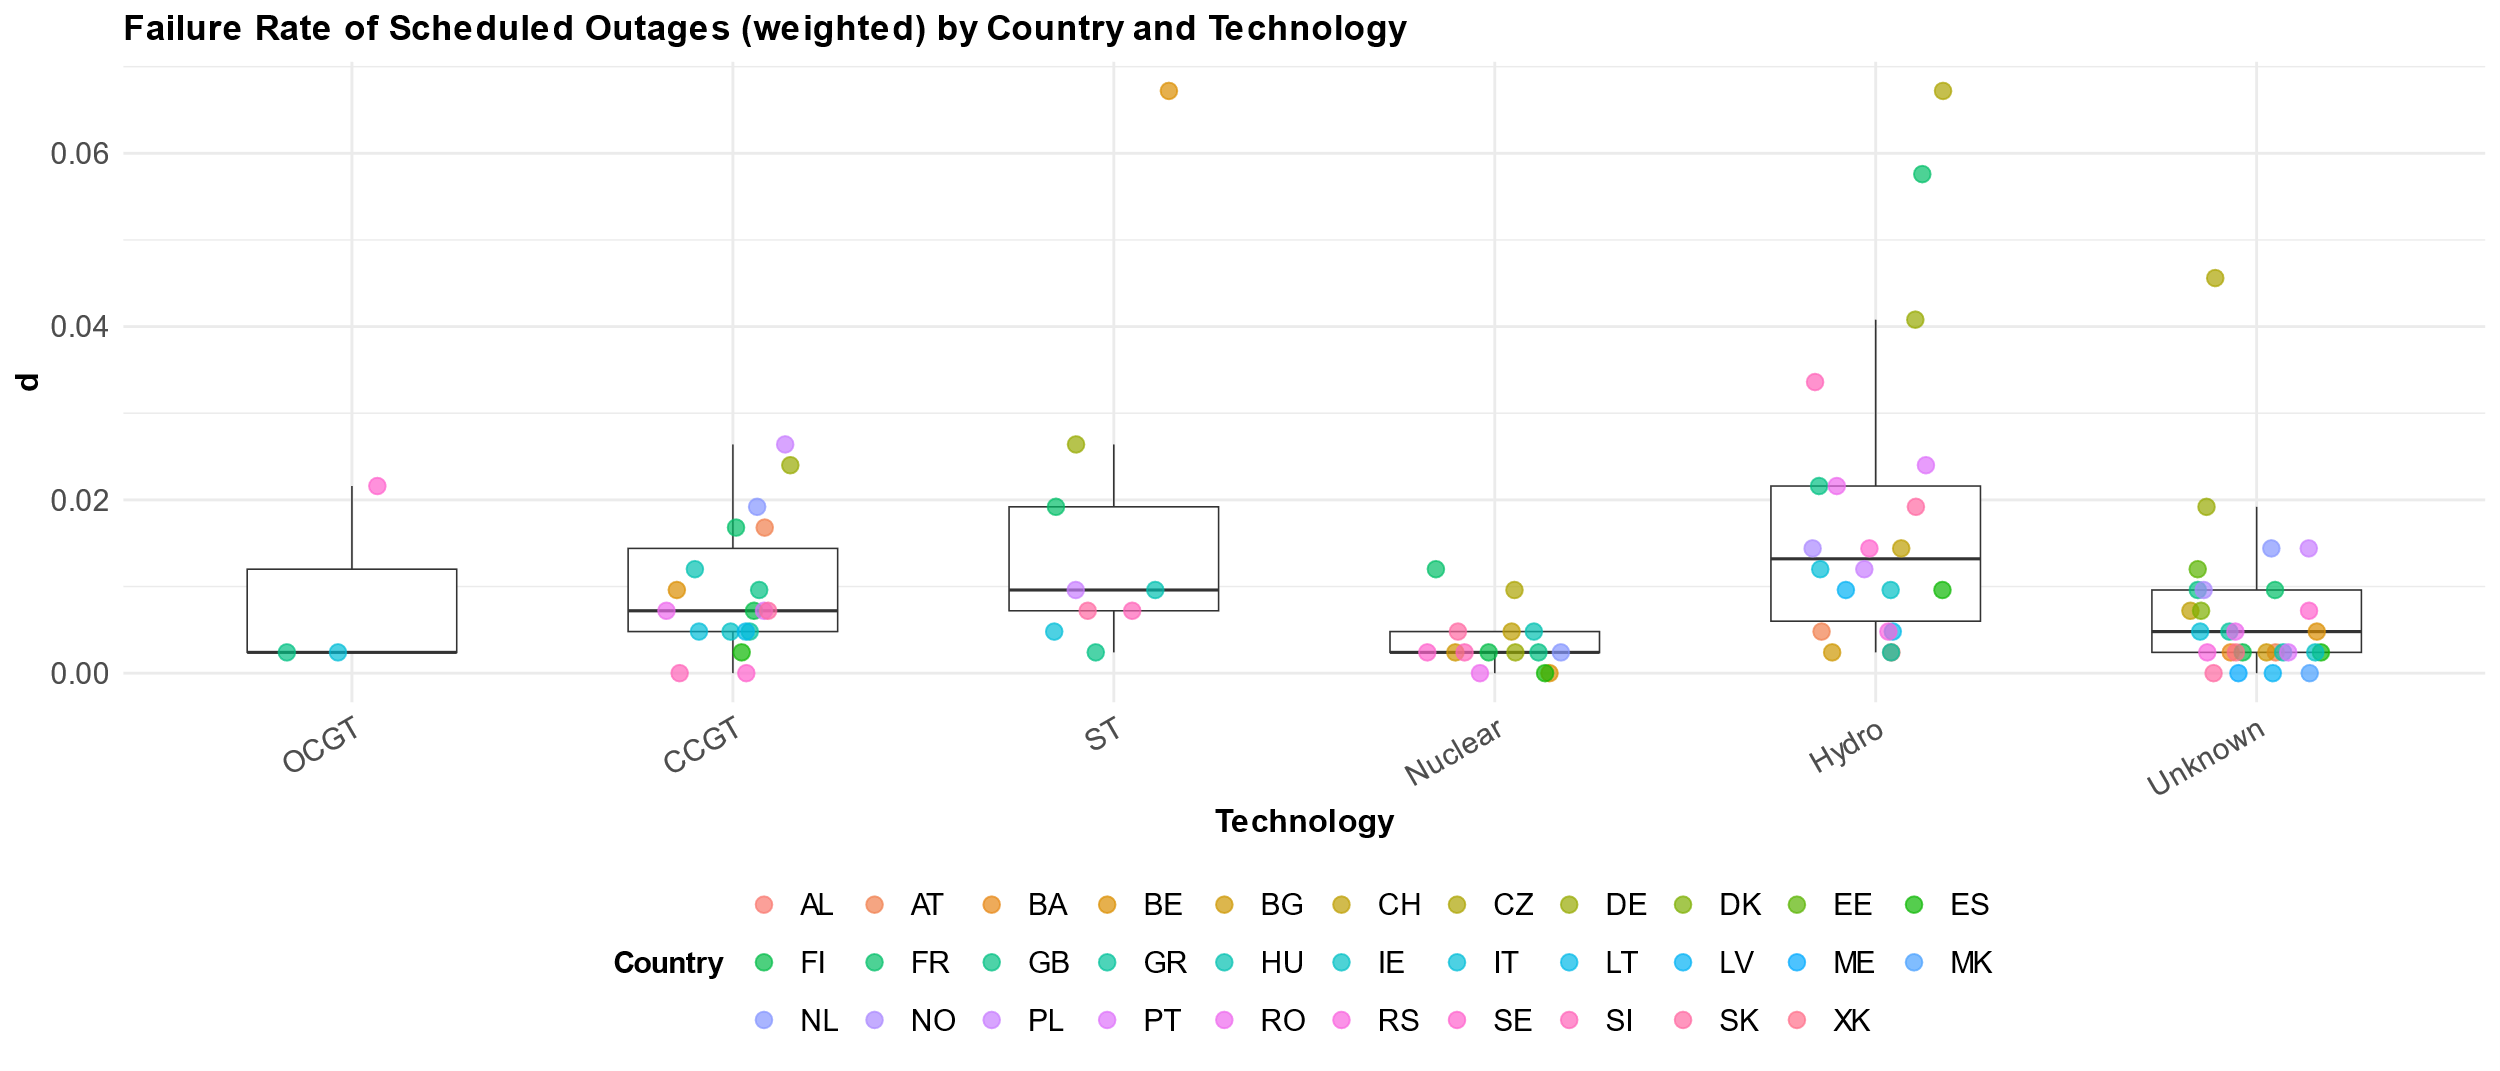


*Figure 11: Distribution of weighted failure rates by scheduled outages for plant technologies and countries of the data set*


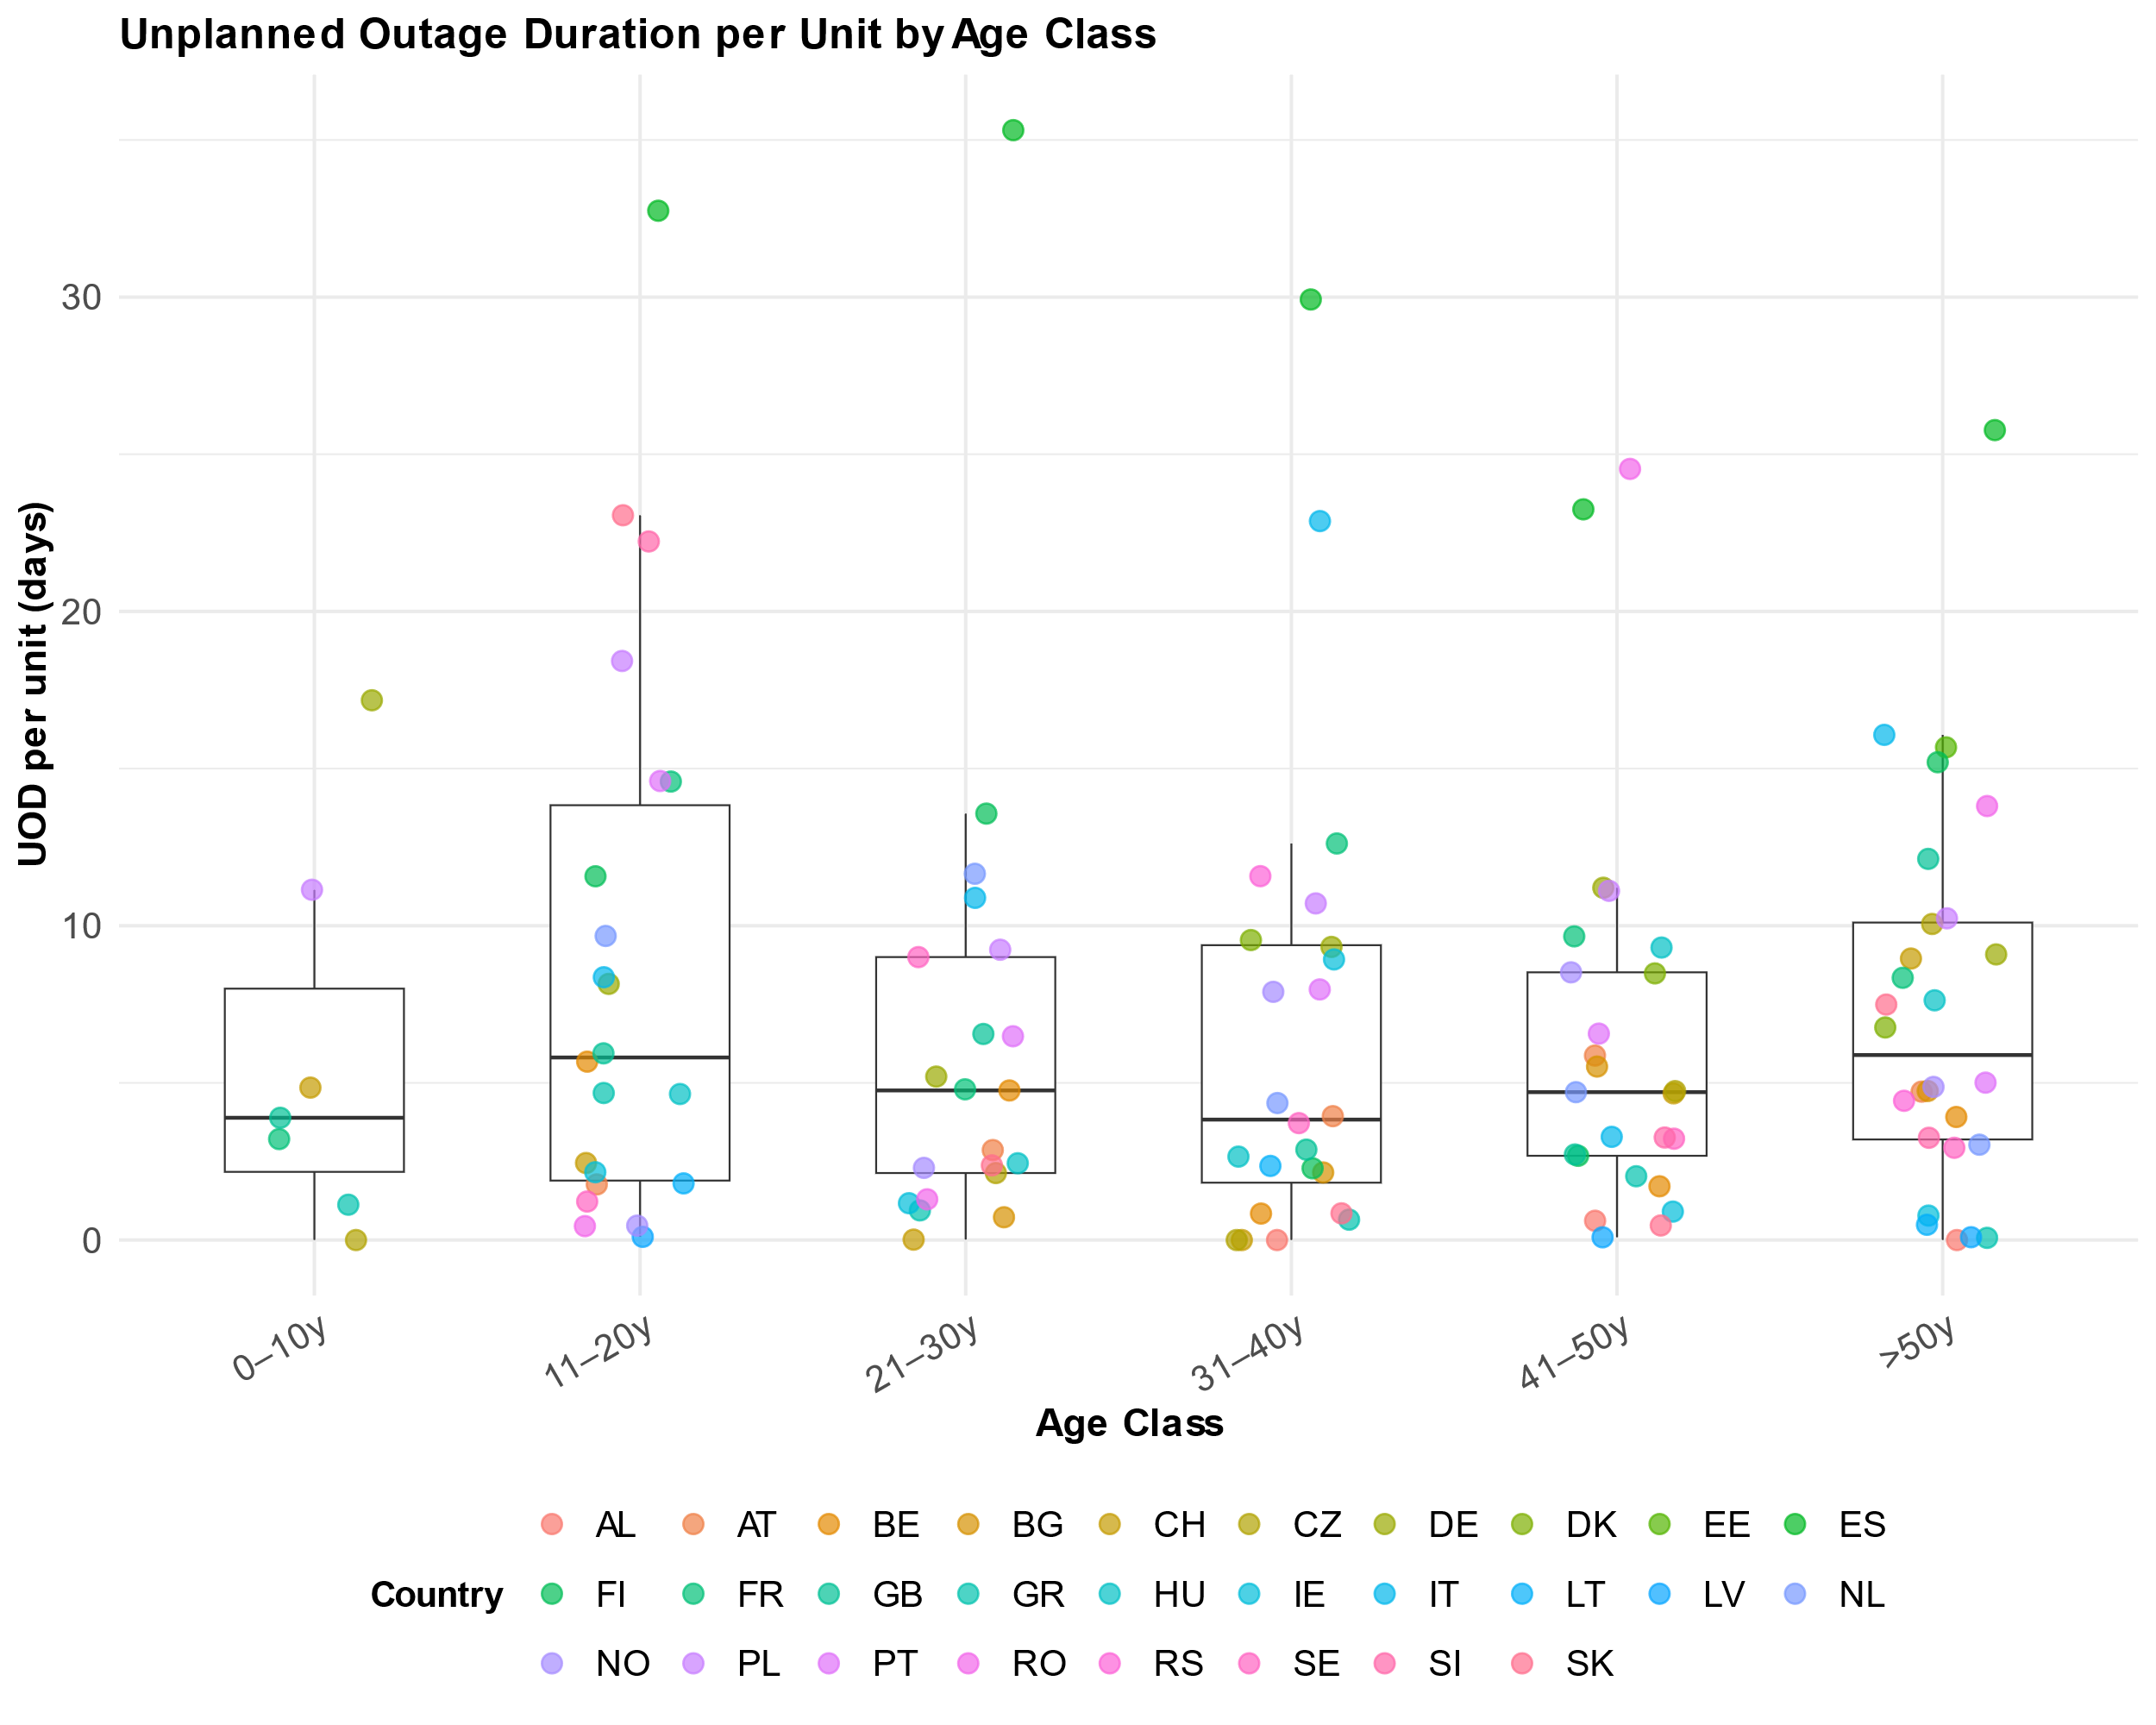


*Figure 12: Distribution of duration for unplanned outages for age classes and countries of the data set*


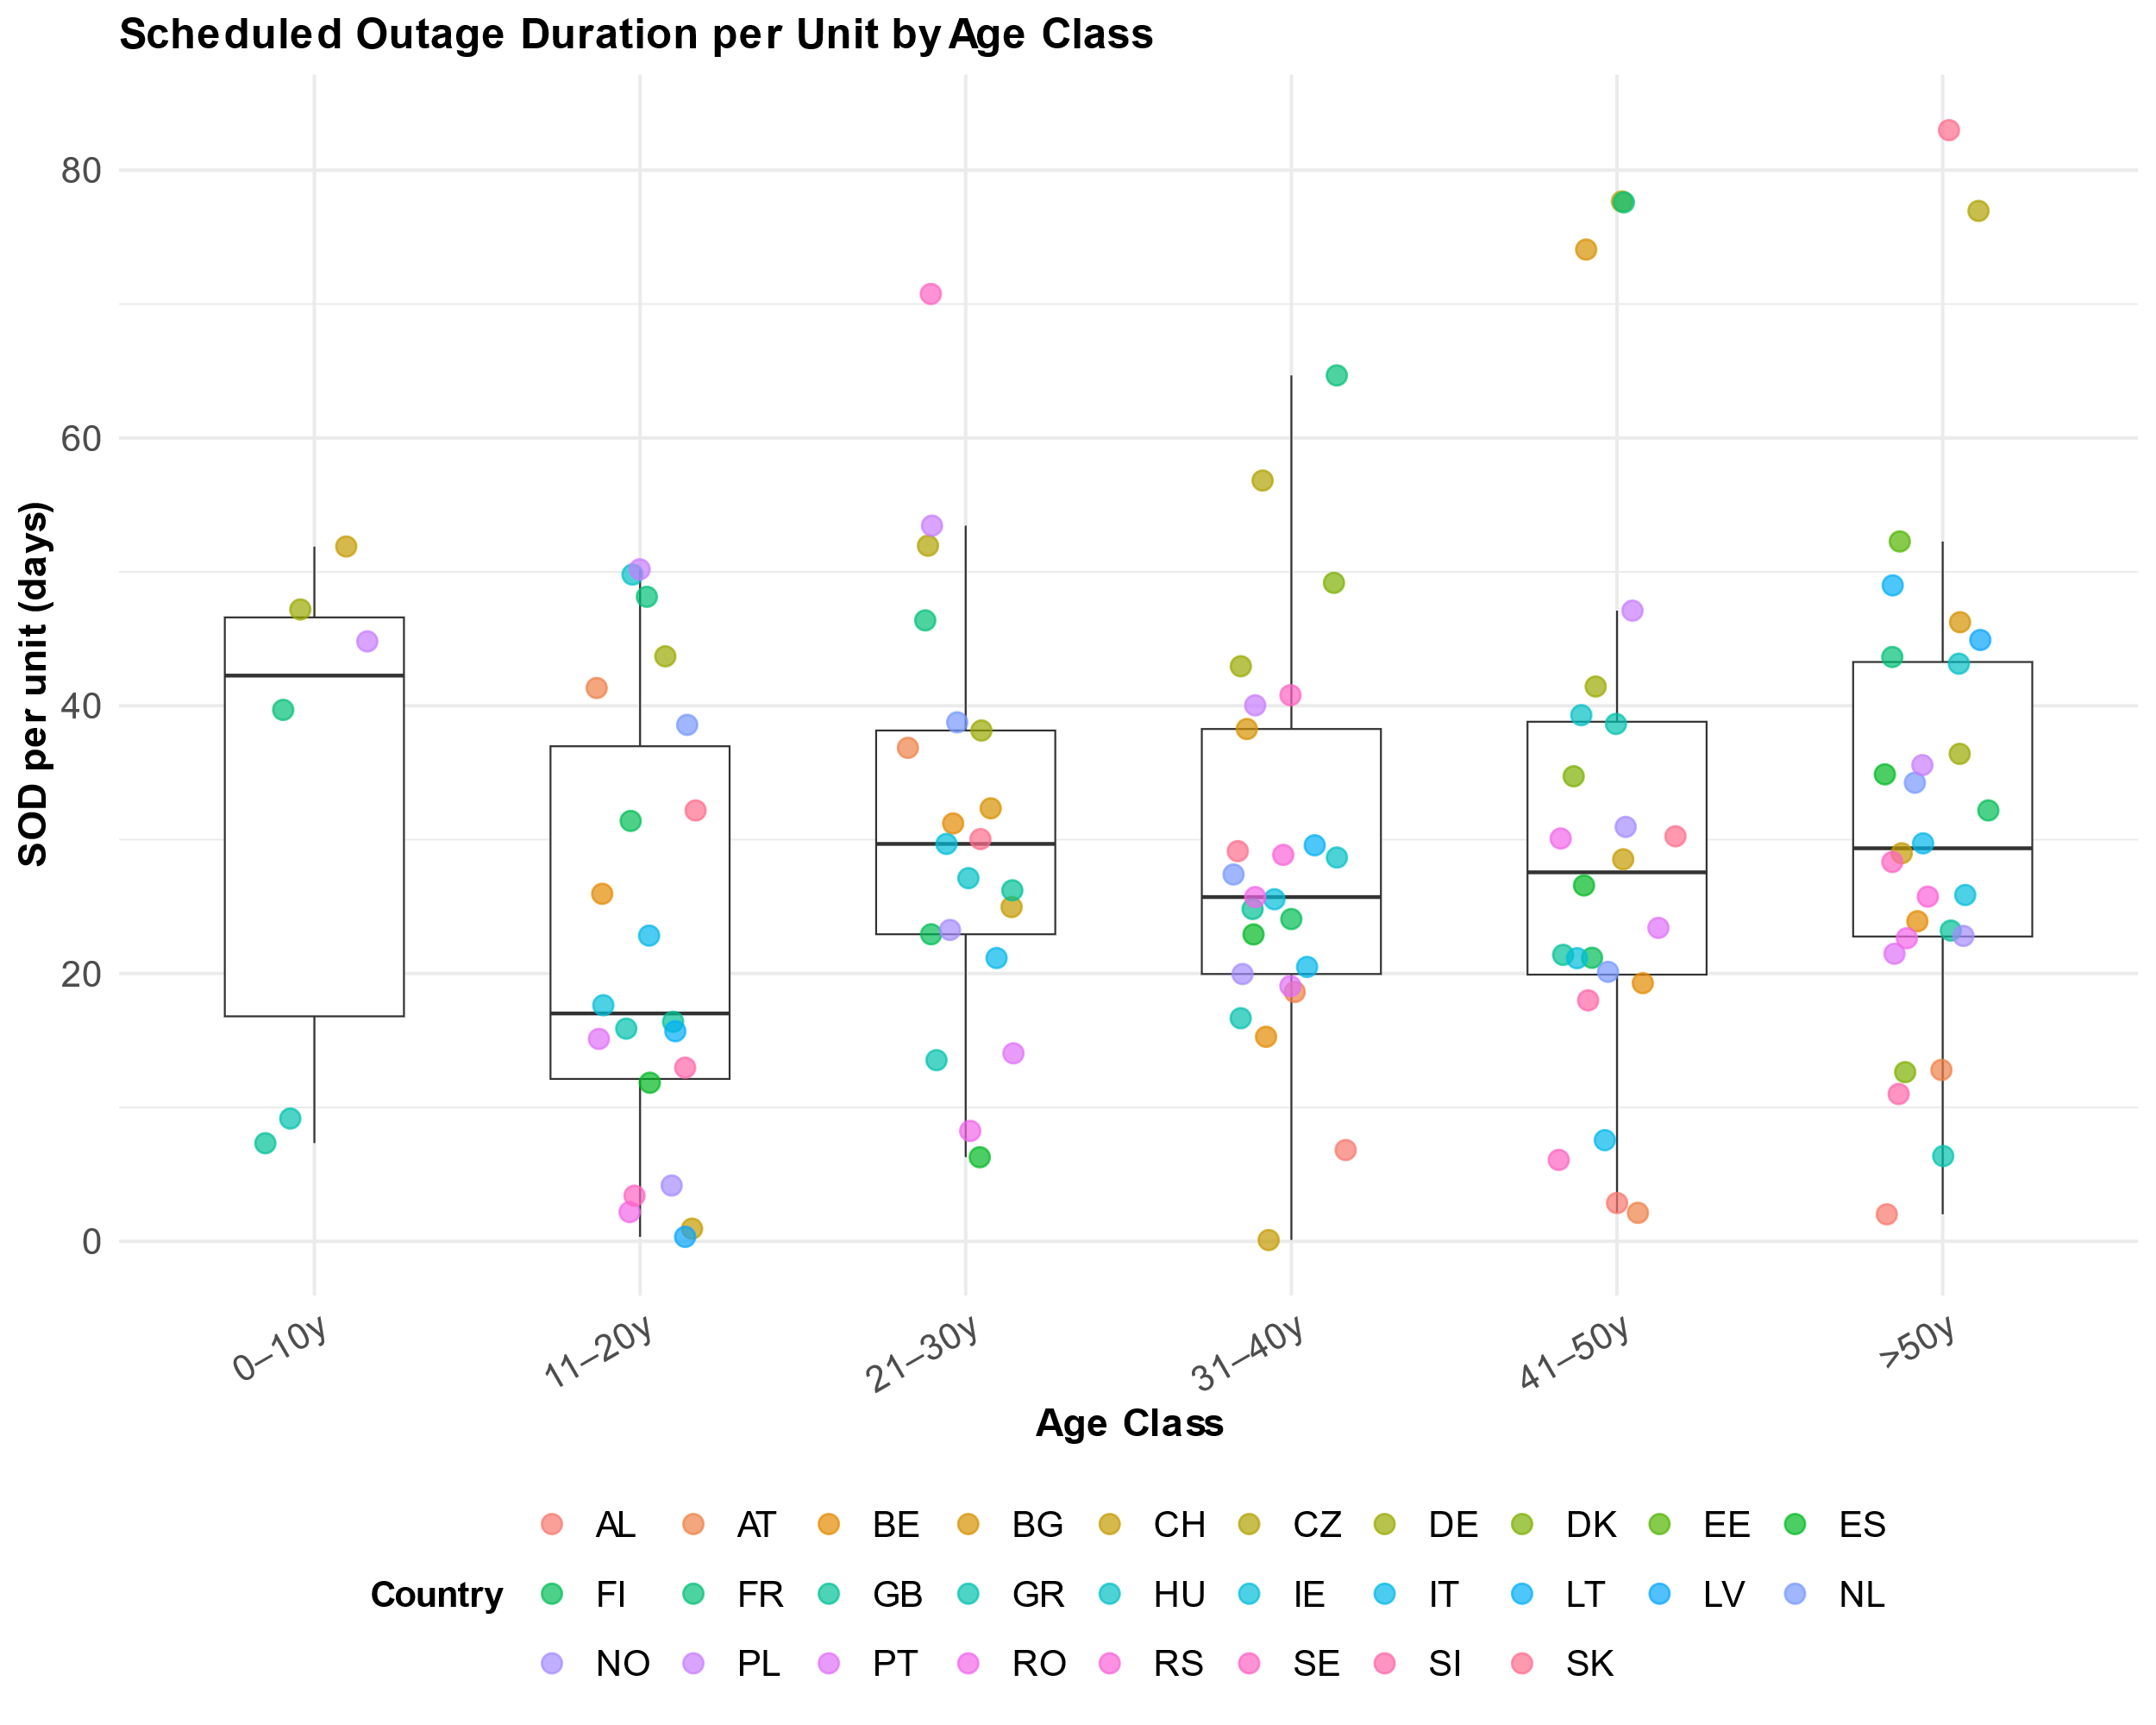


*Figure 13: Distribution of duration for scheduled outages for age classes and countries of the data set*

**Validation of performance measures**

**Other studies**


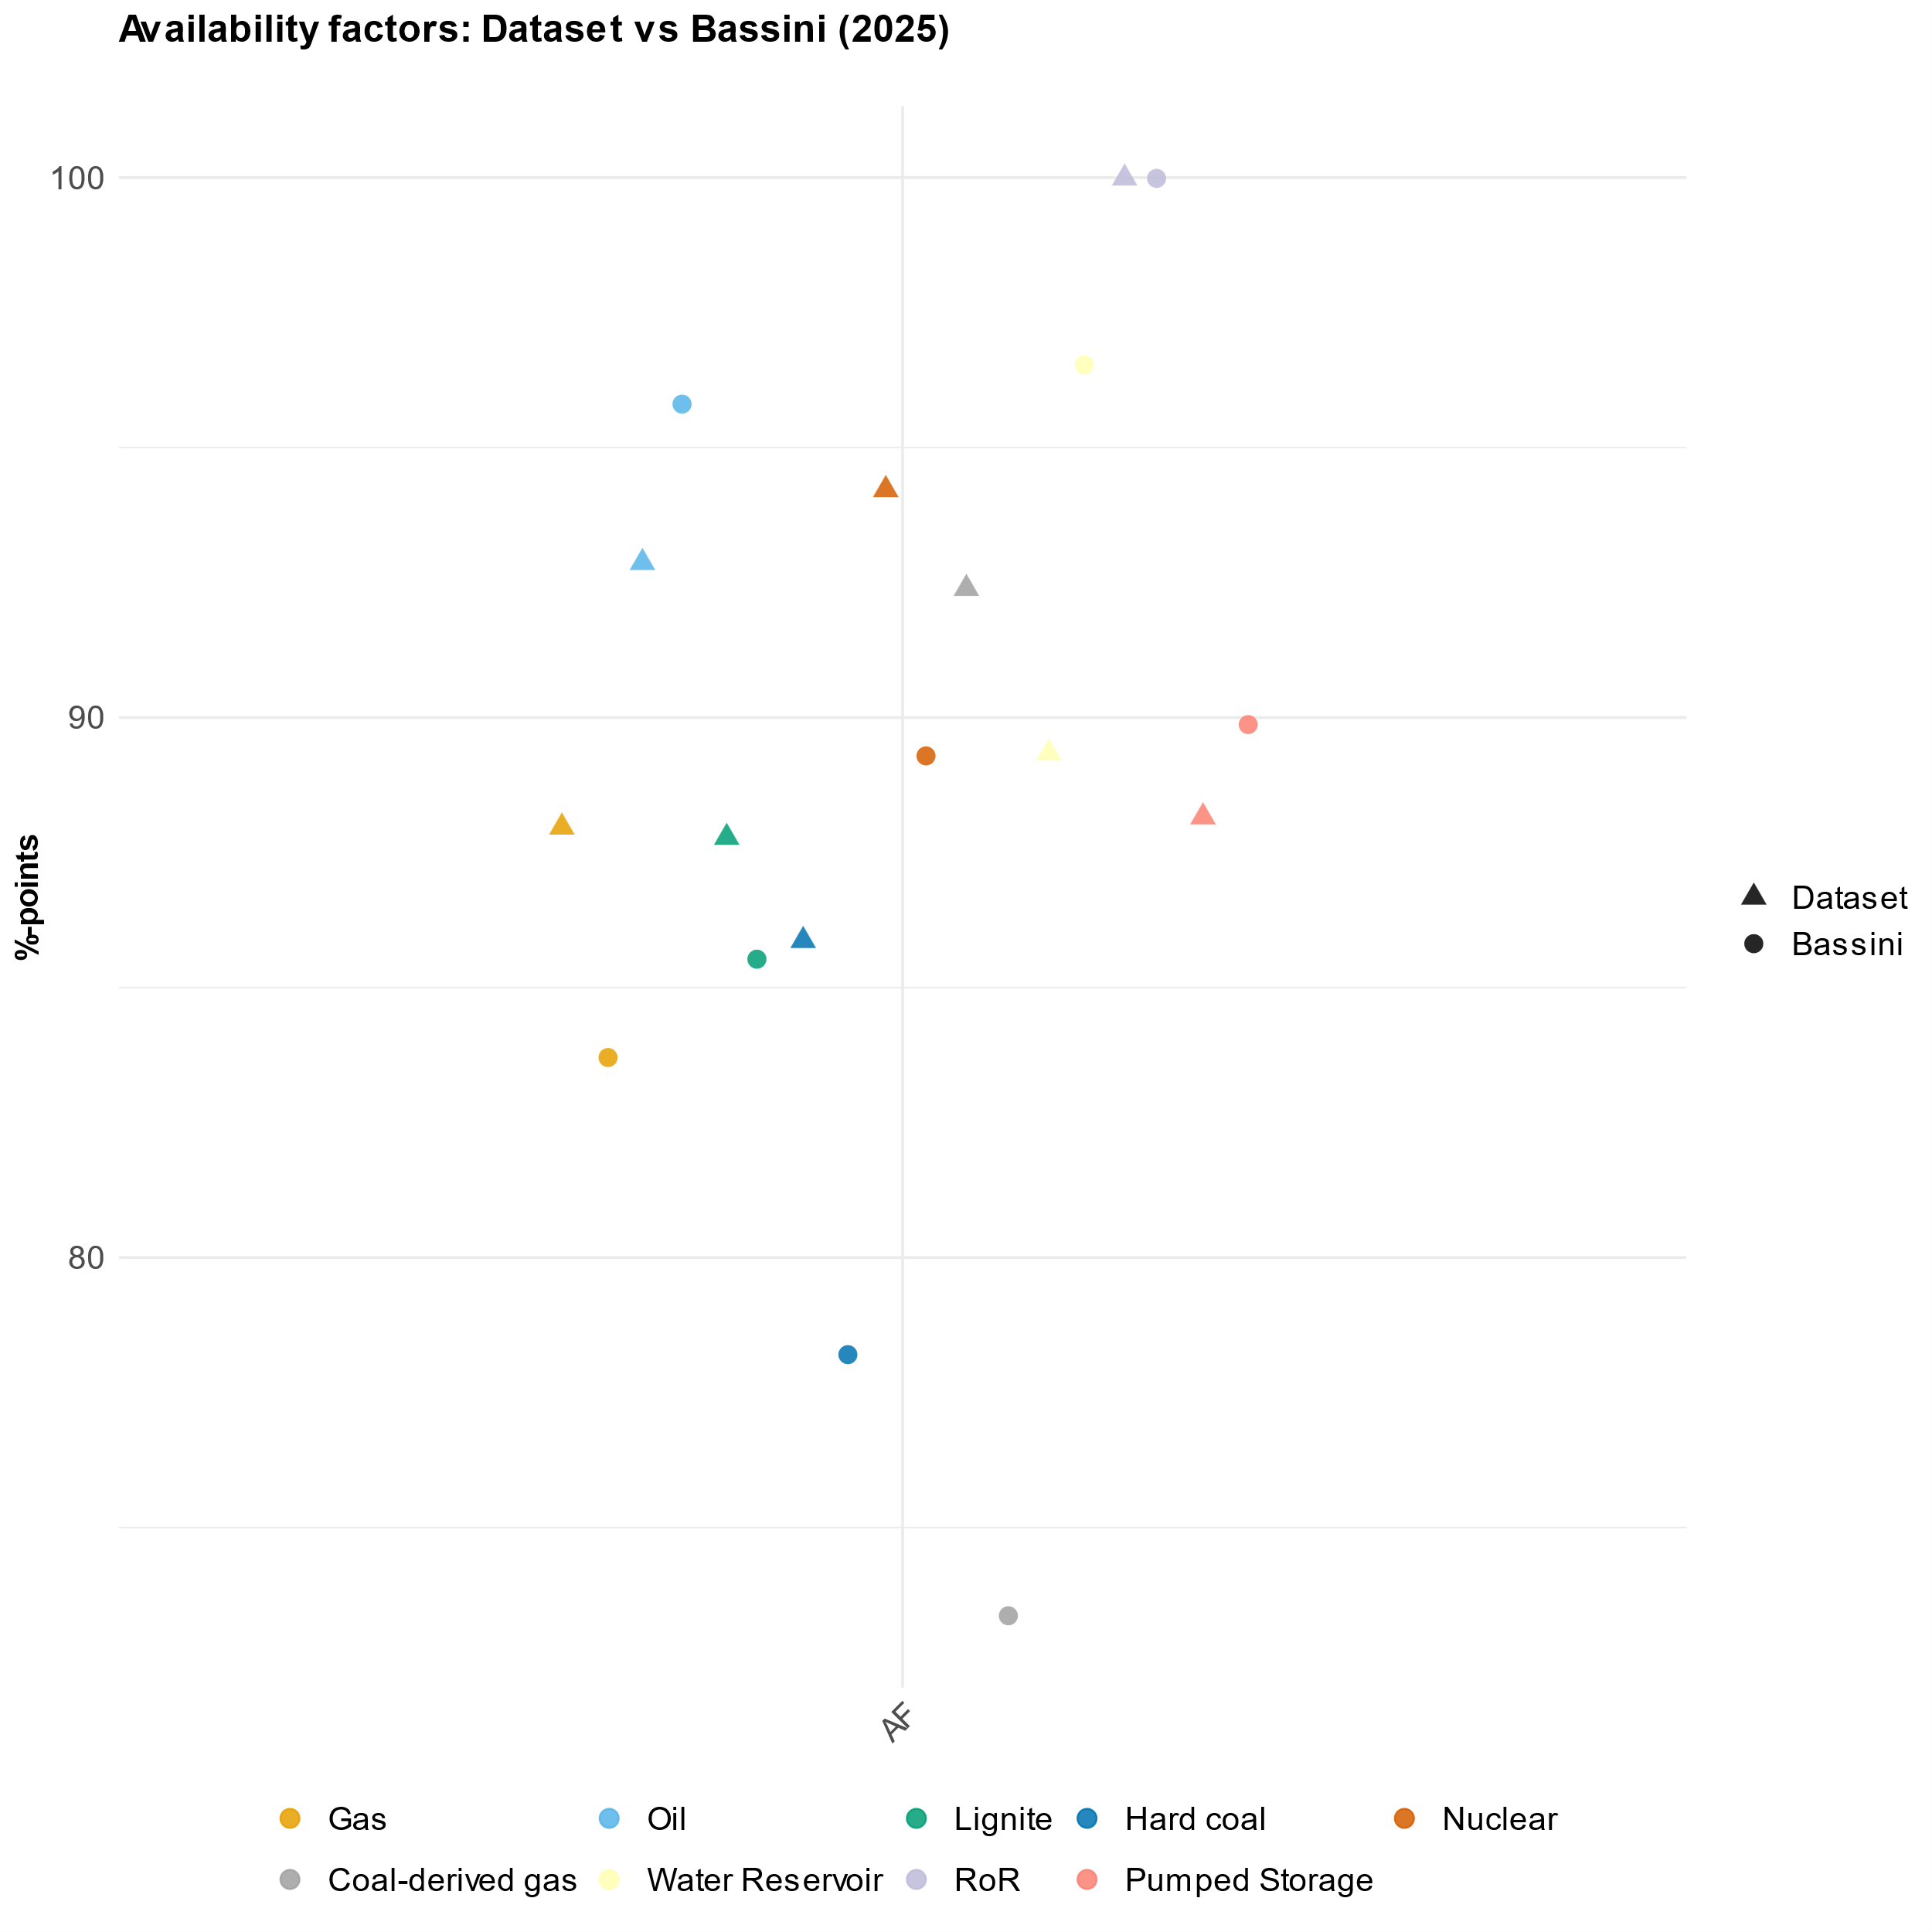


*Figure 14: Comparison of aggregated availability factors for German plant types from Bassini 2025.*

**Historical generation**


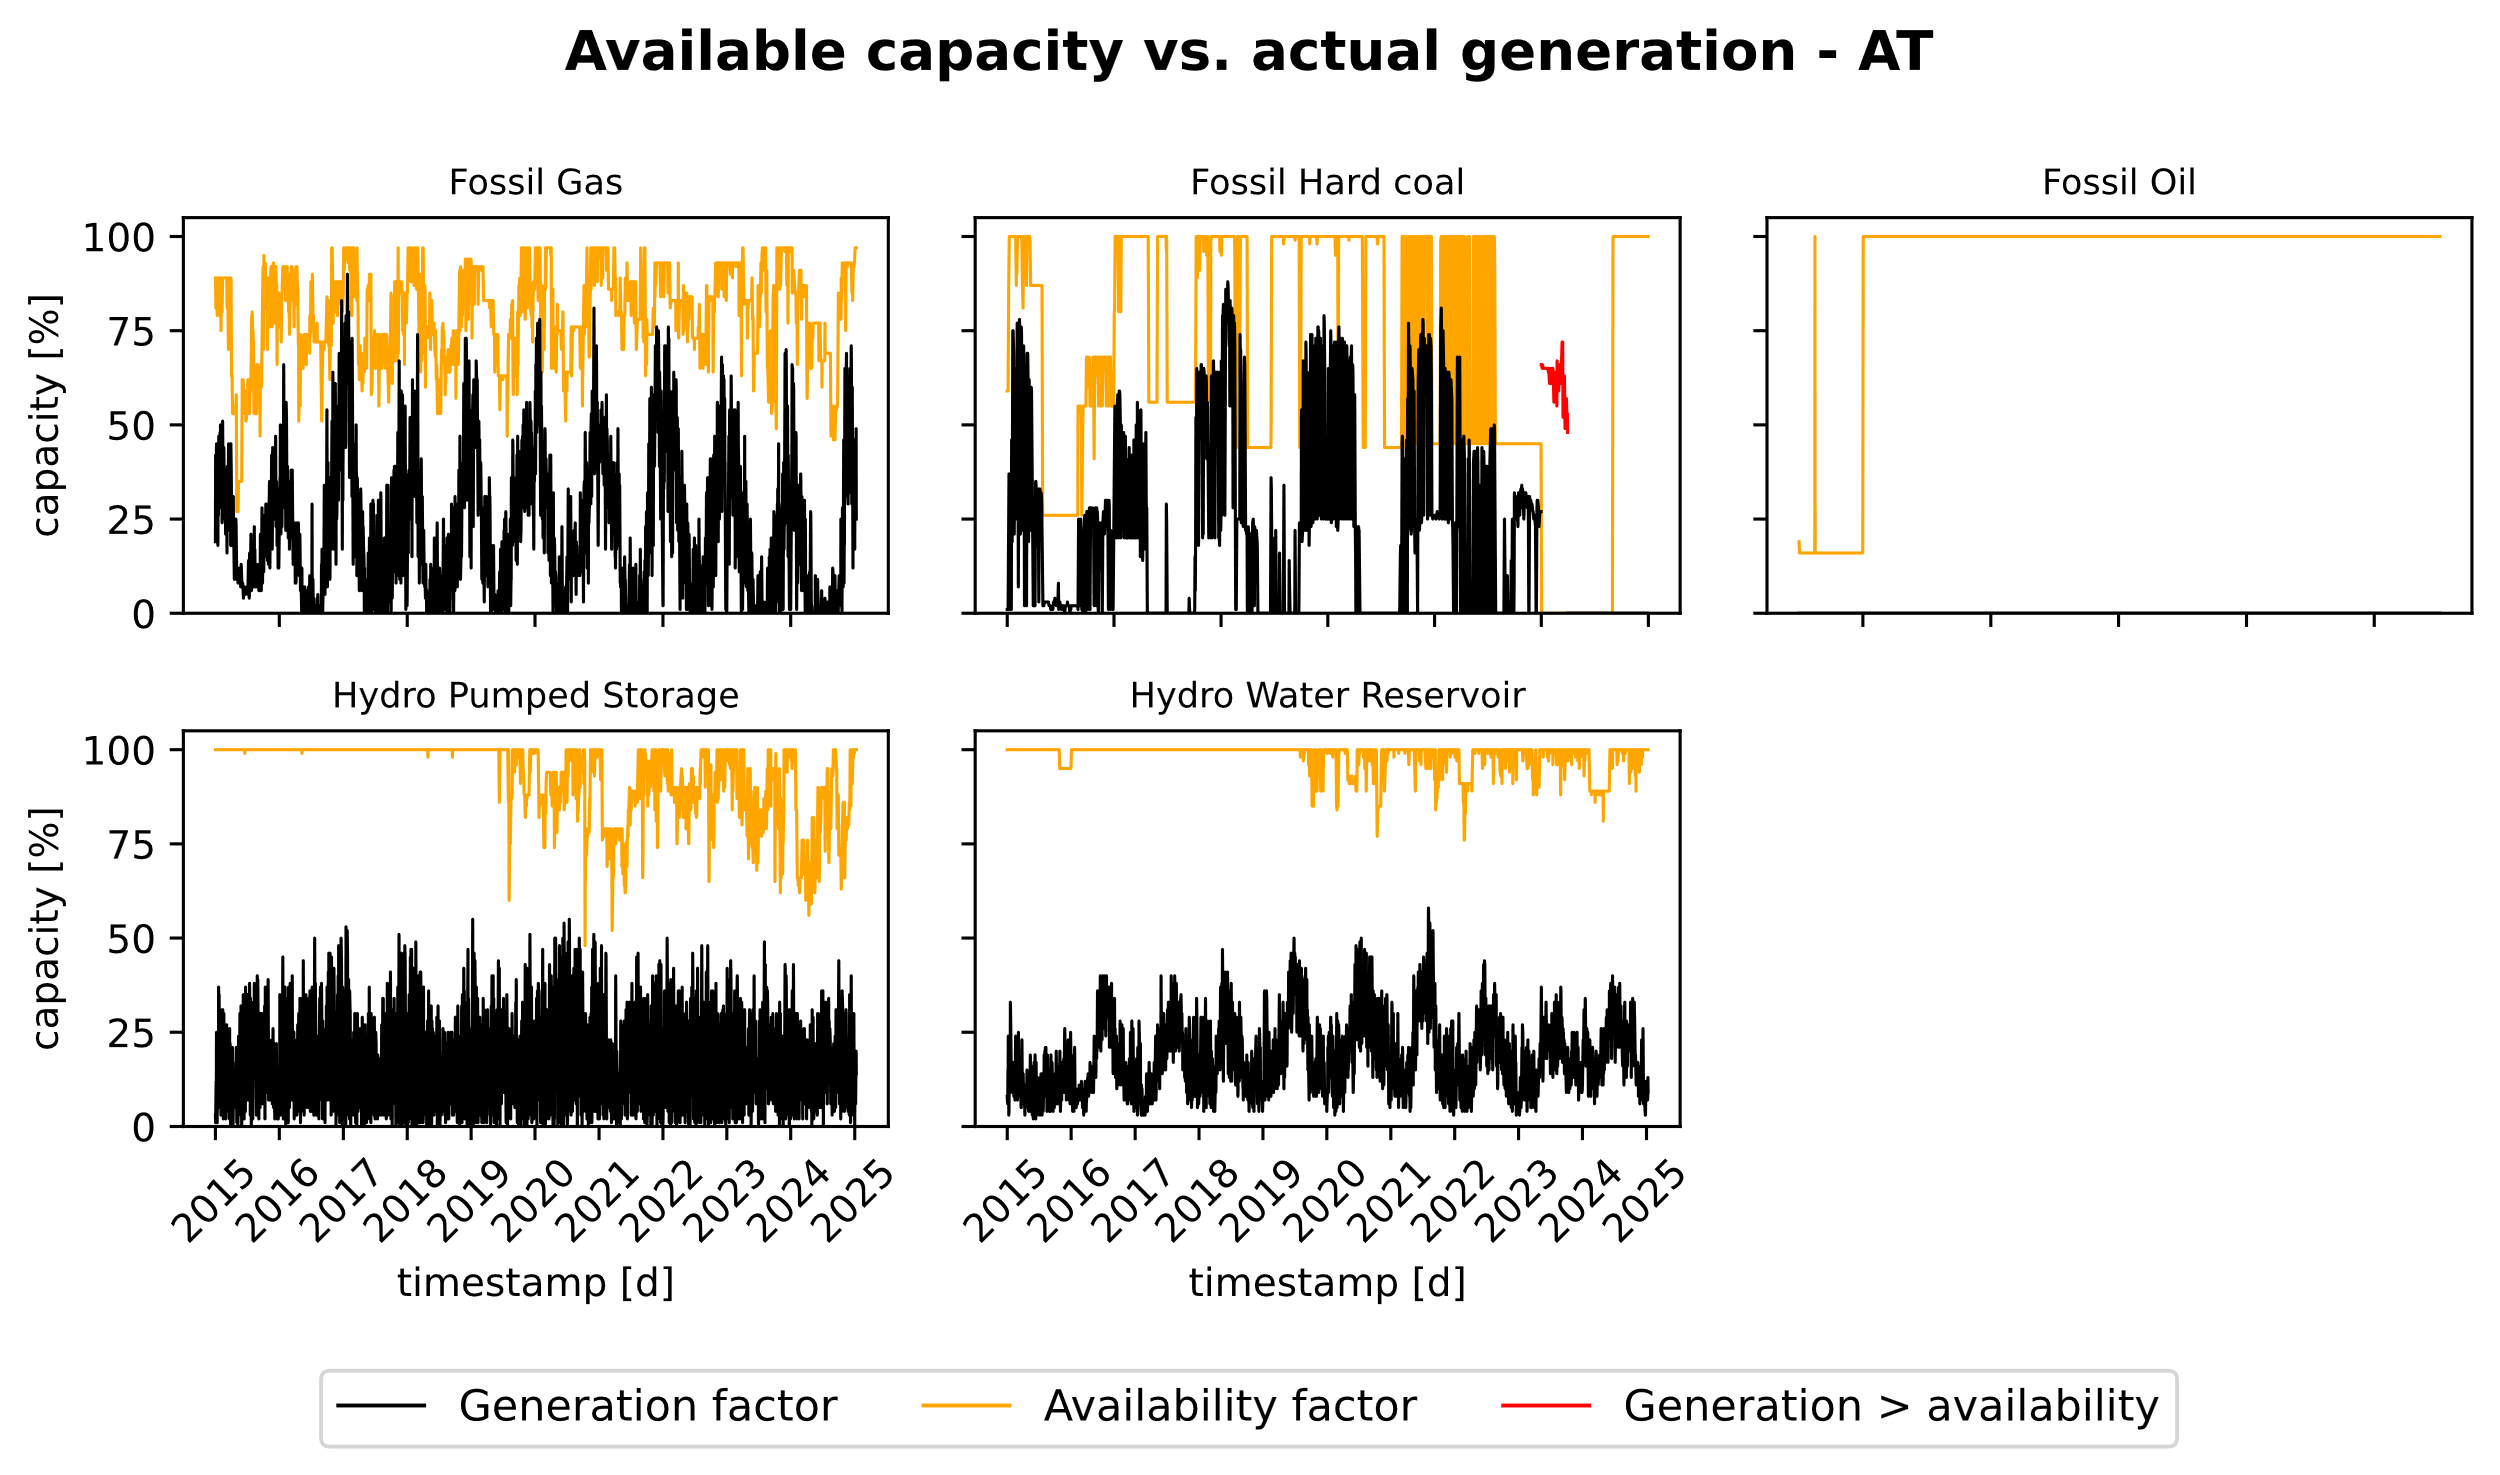


*Figure 15: Comparison of aggregated available capacity vs daily generation for Austria*


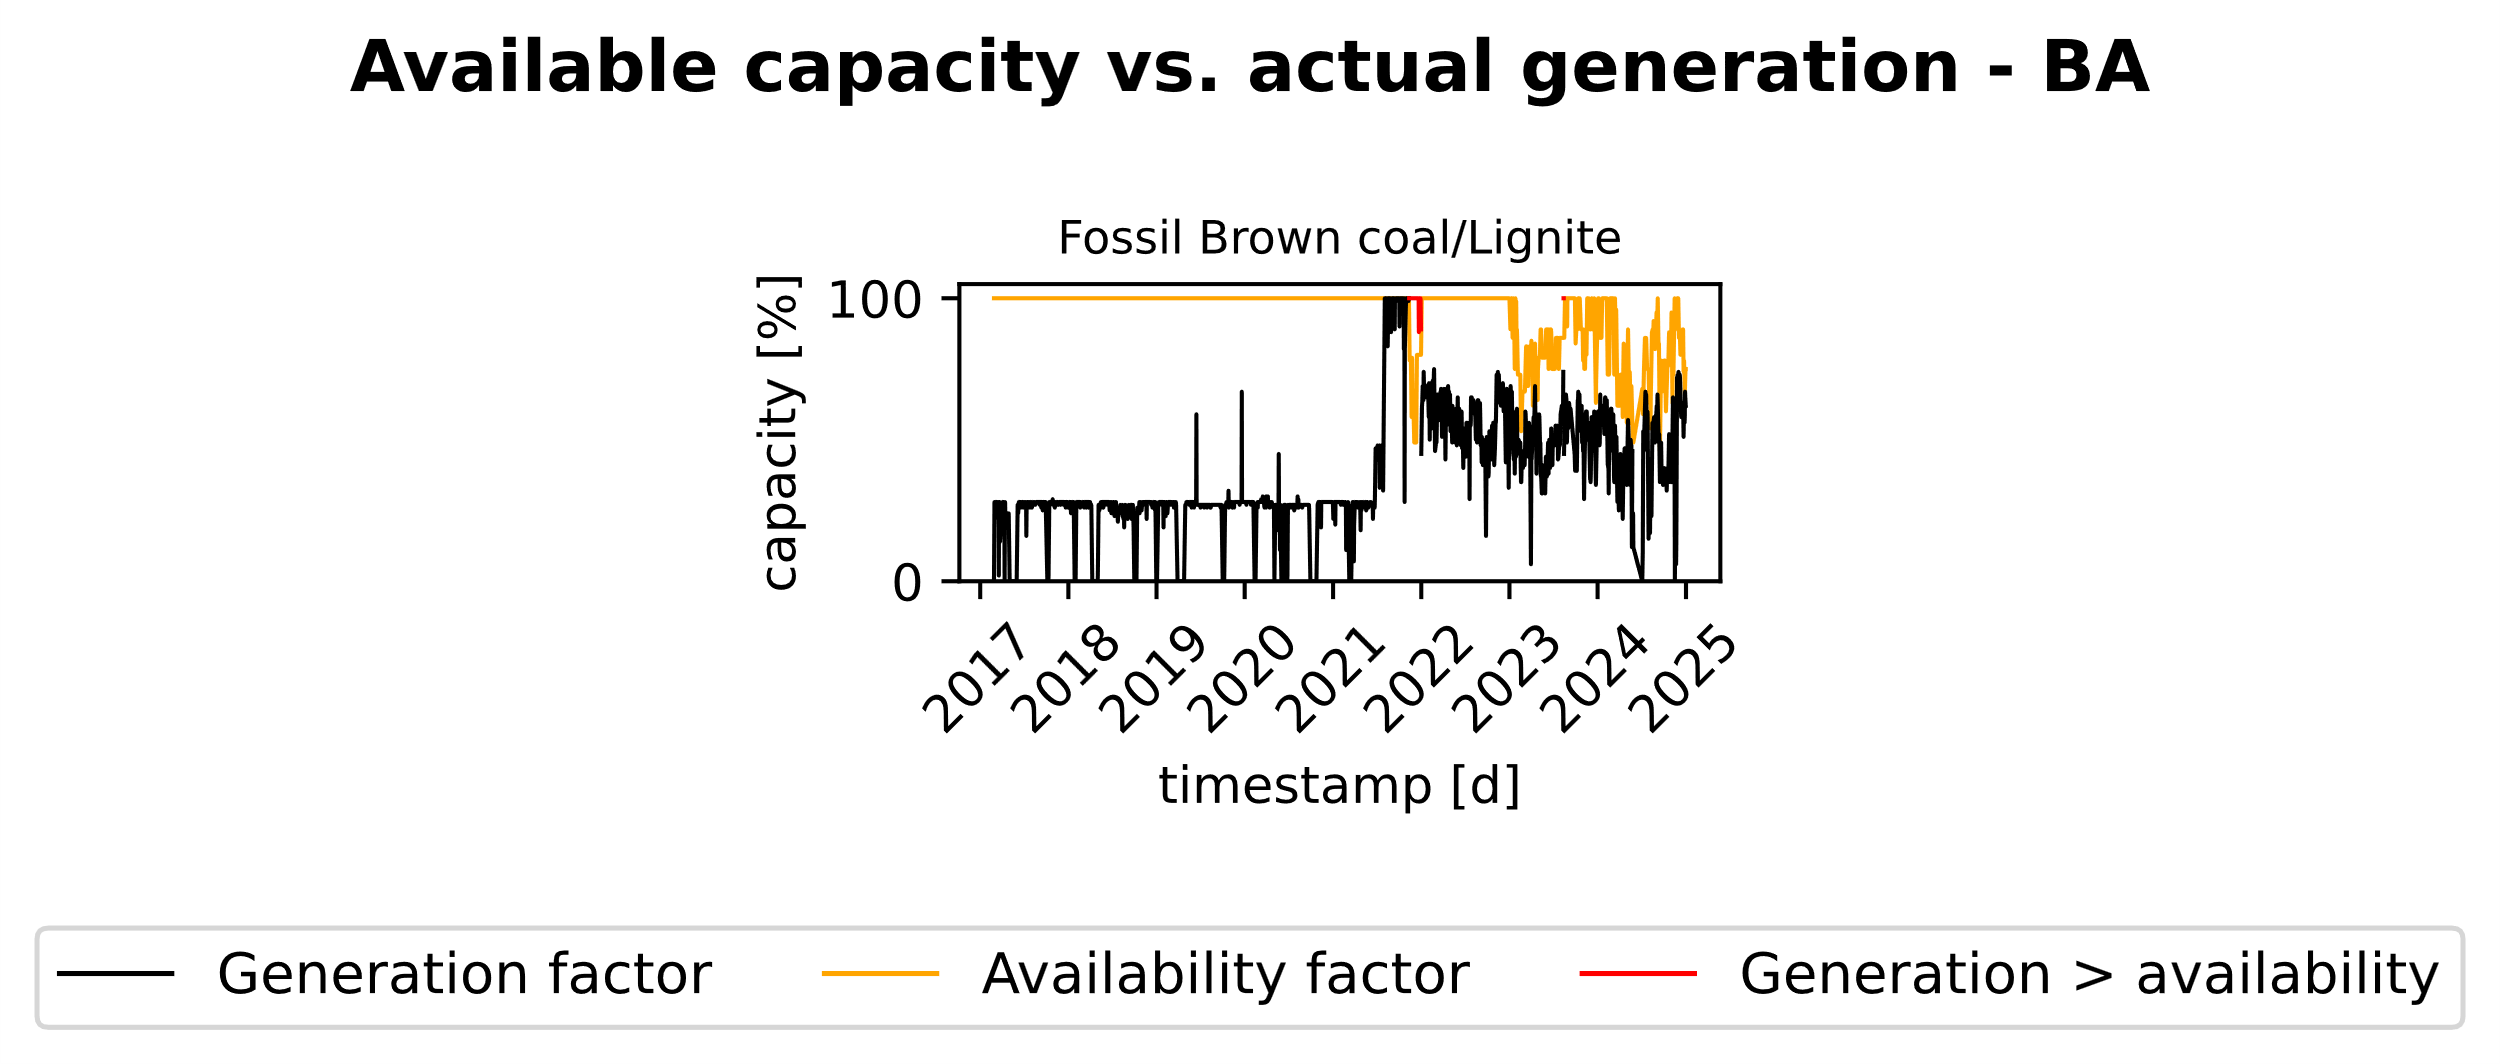


*Figure 16: Comparison of aggregated available capacity vs daily generation for Bosnia-Herzegovina*


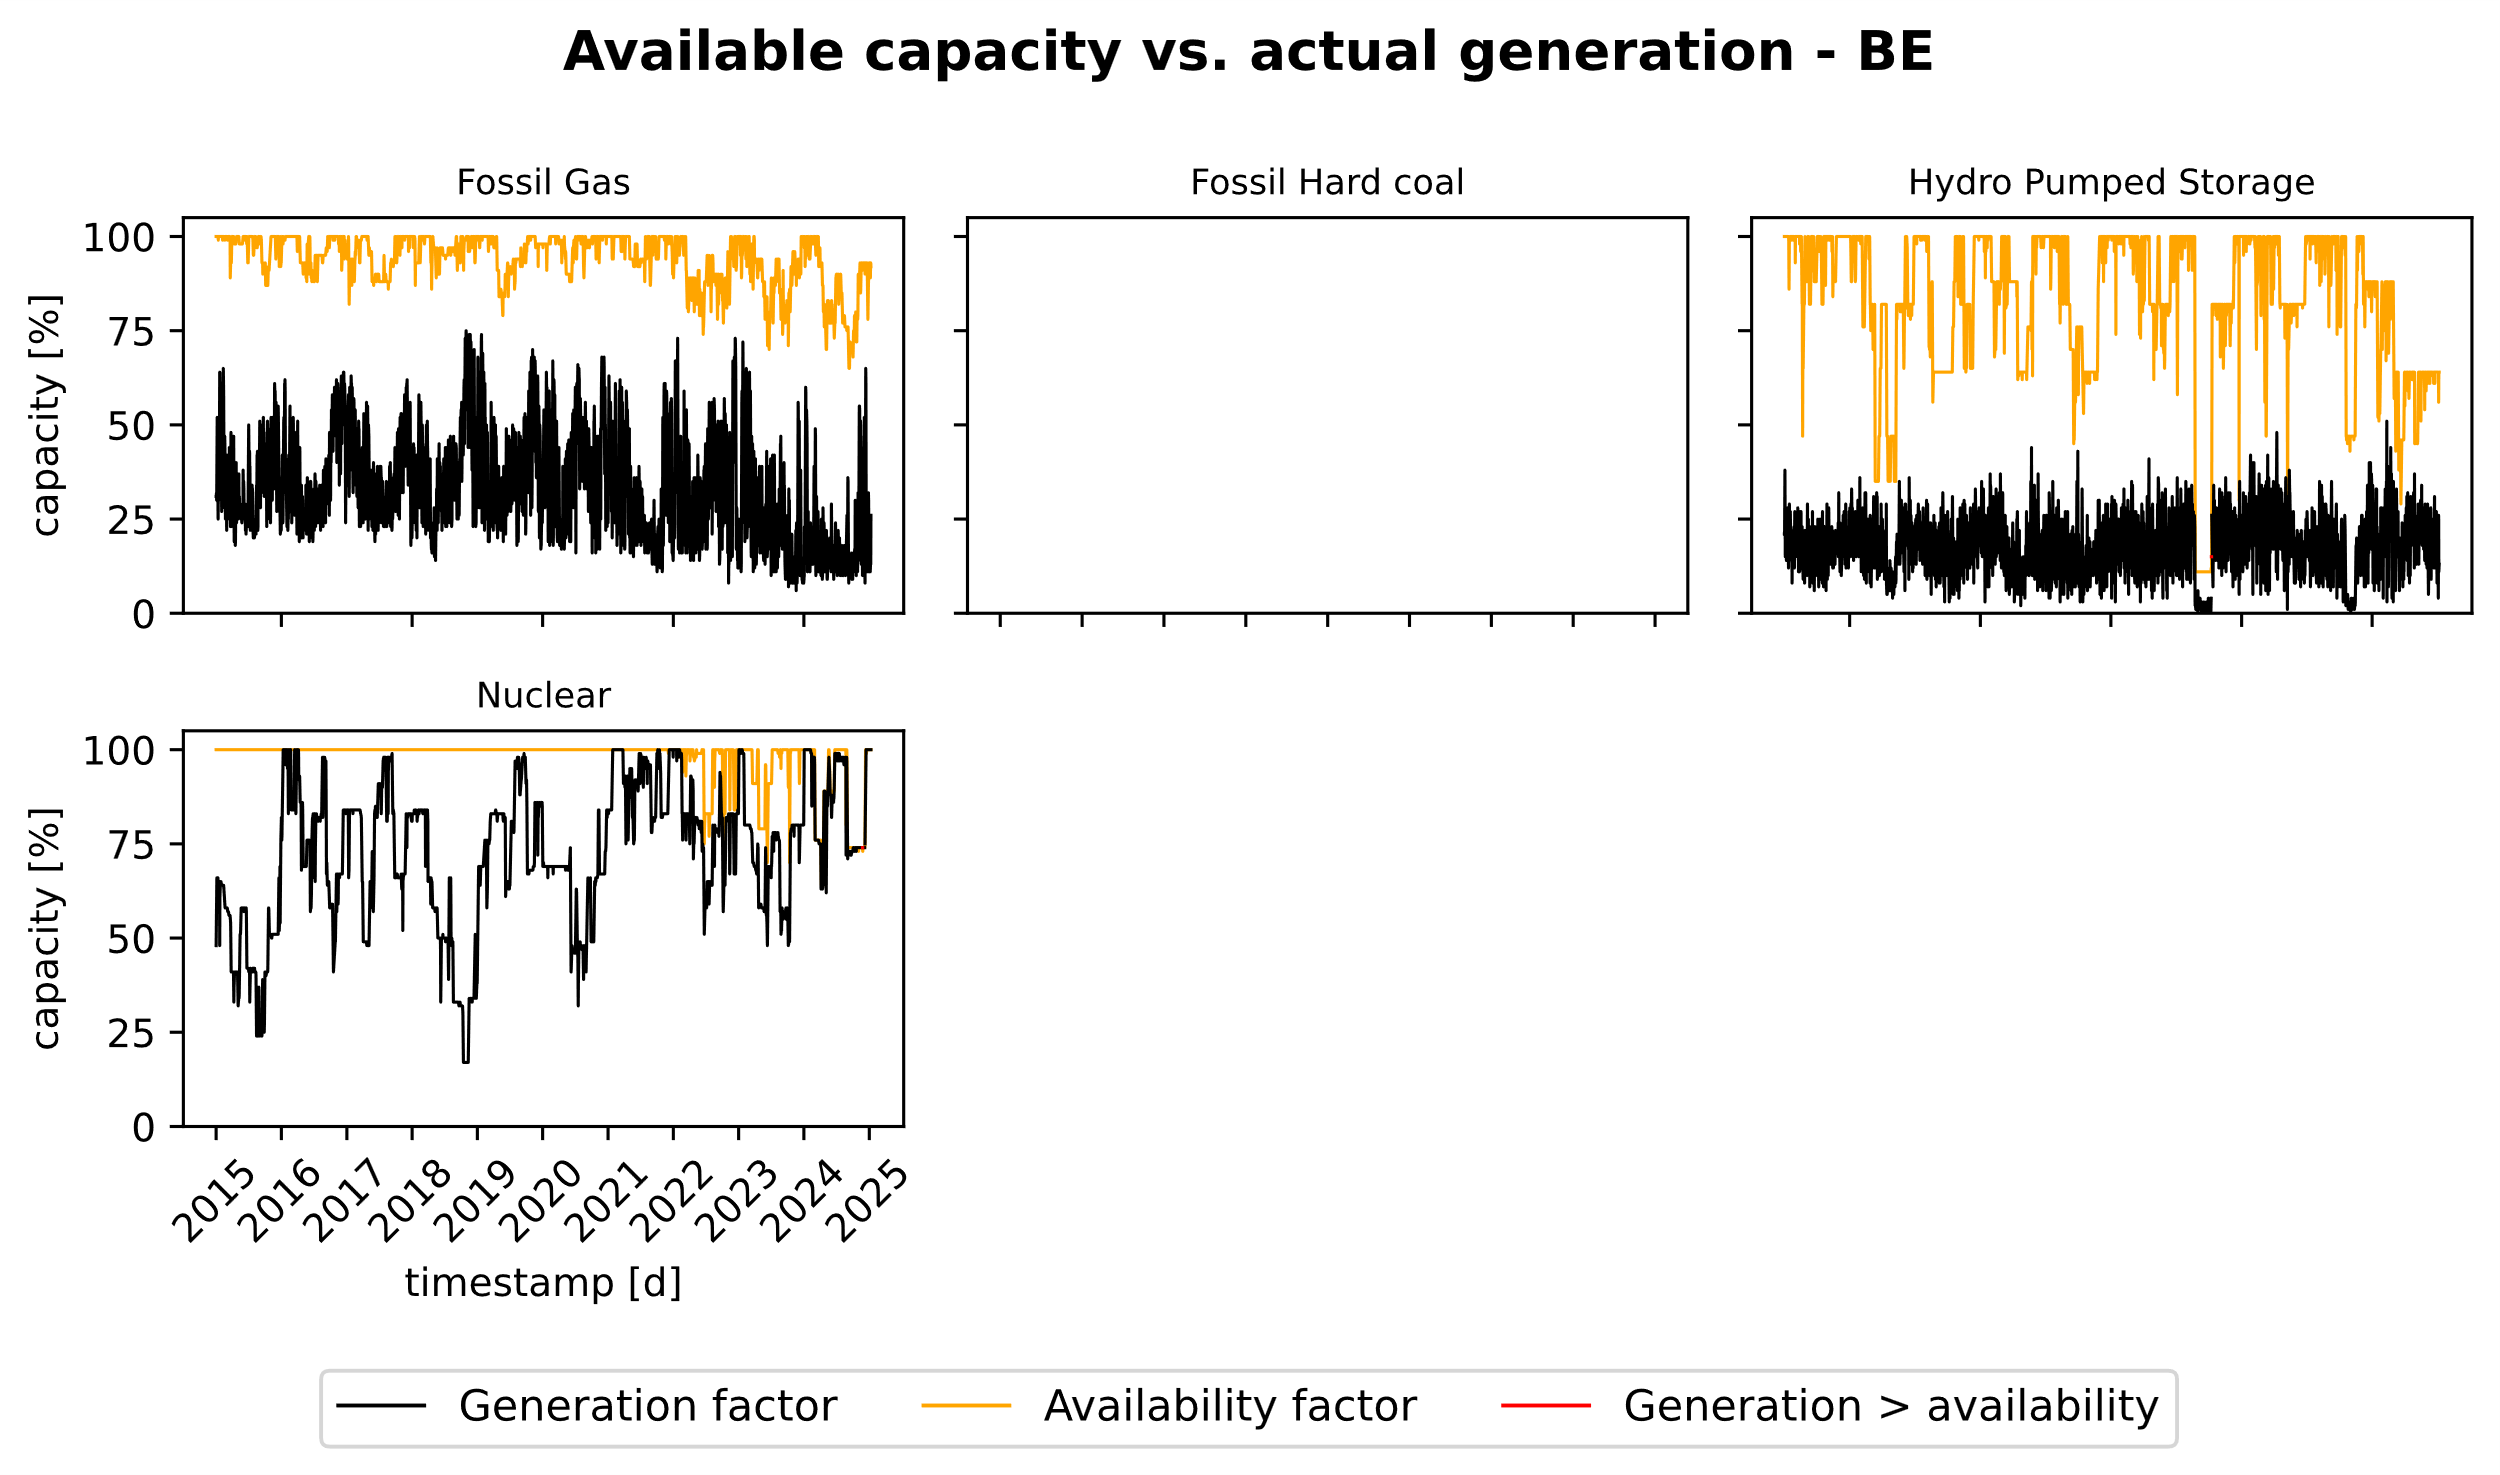


*Figure 17: Comparison of aggregated available capacity vs daily generation for Belgium*


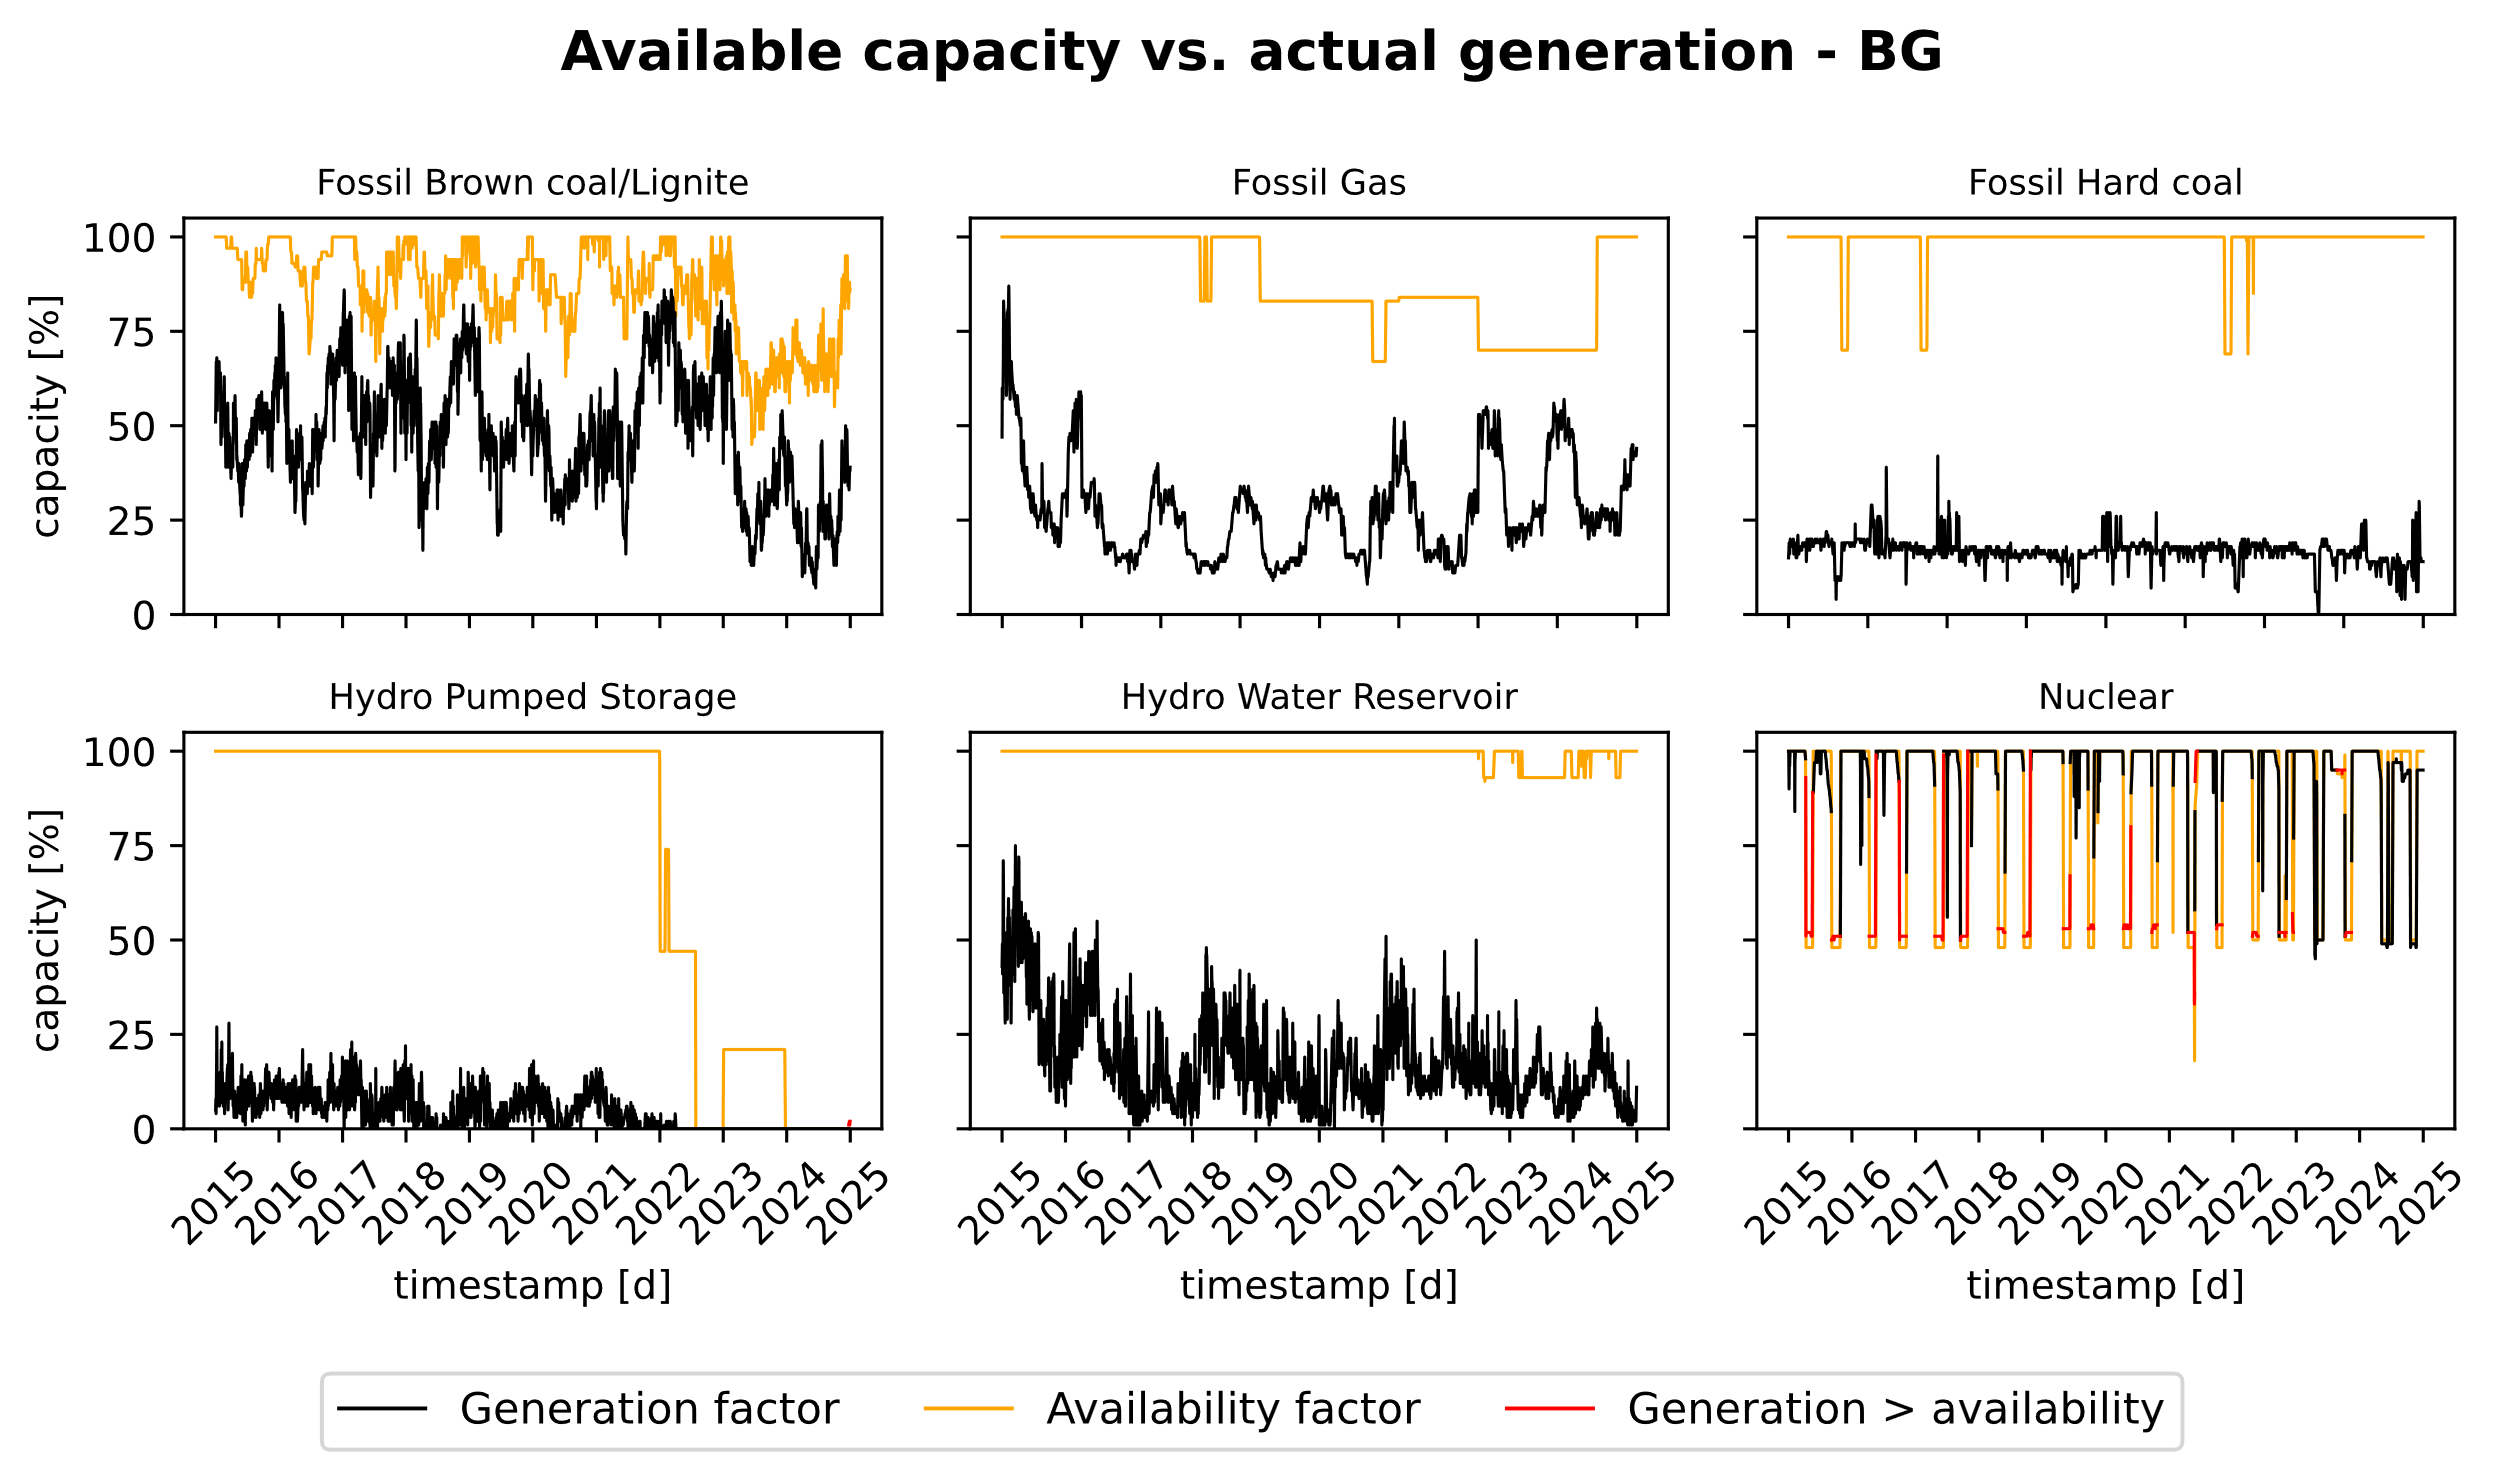


*Figure 18: Comparison of aggregated available capacity vs daily generation for Bulgaria*


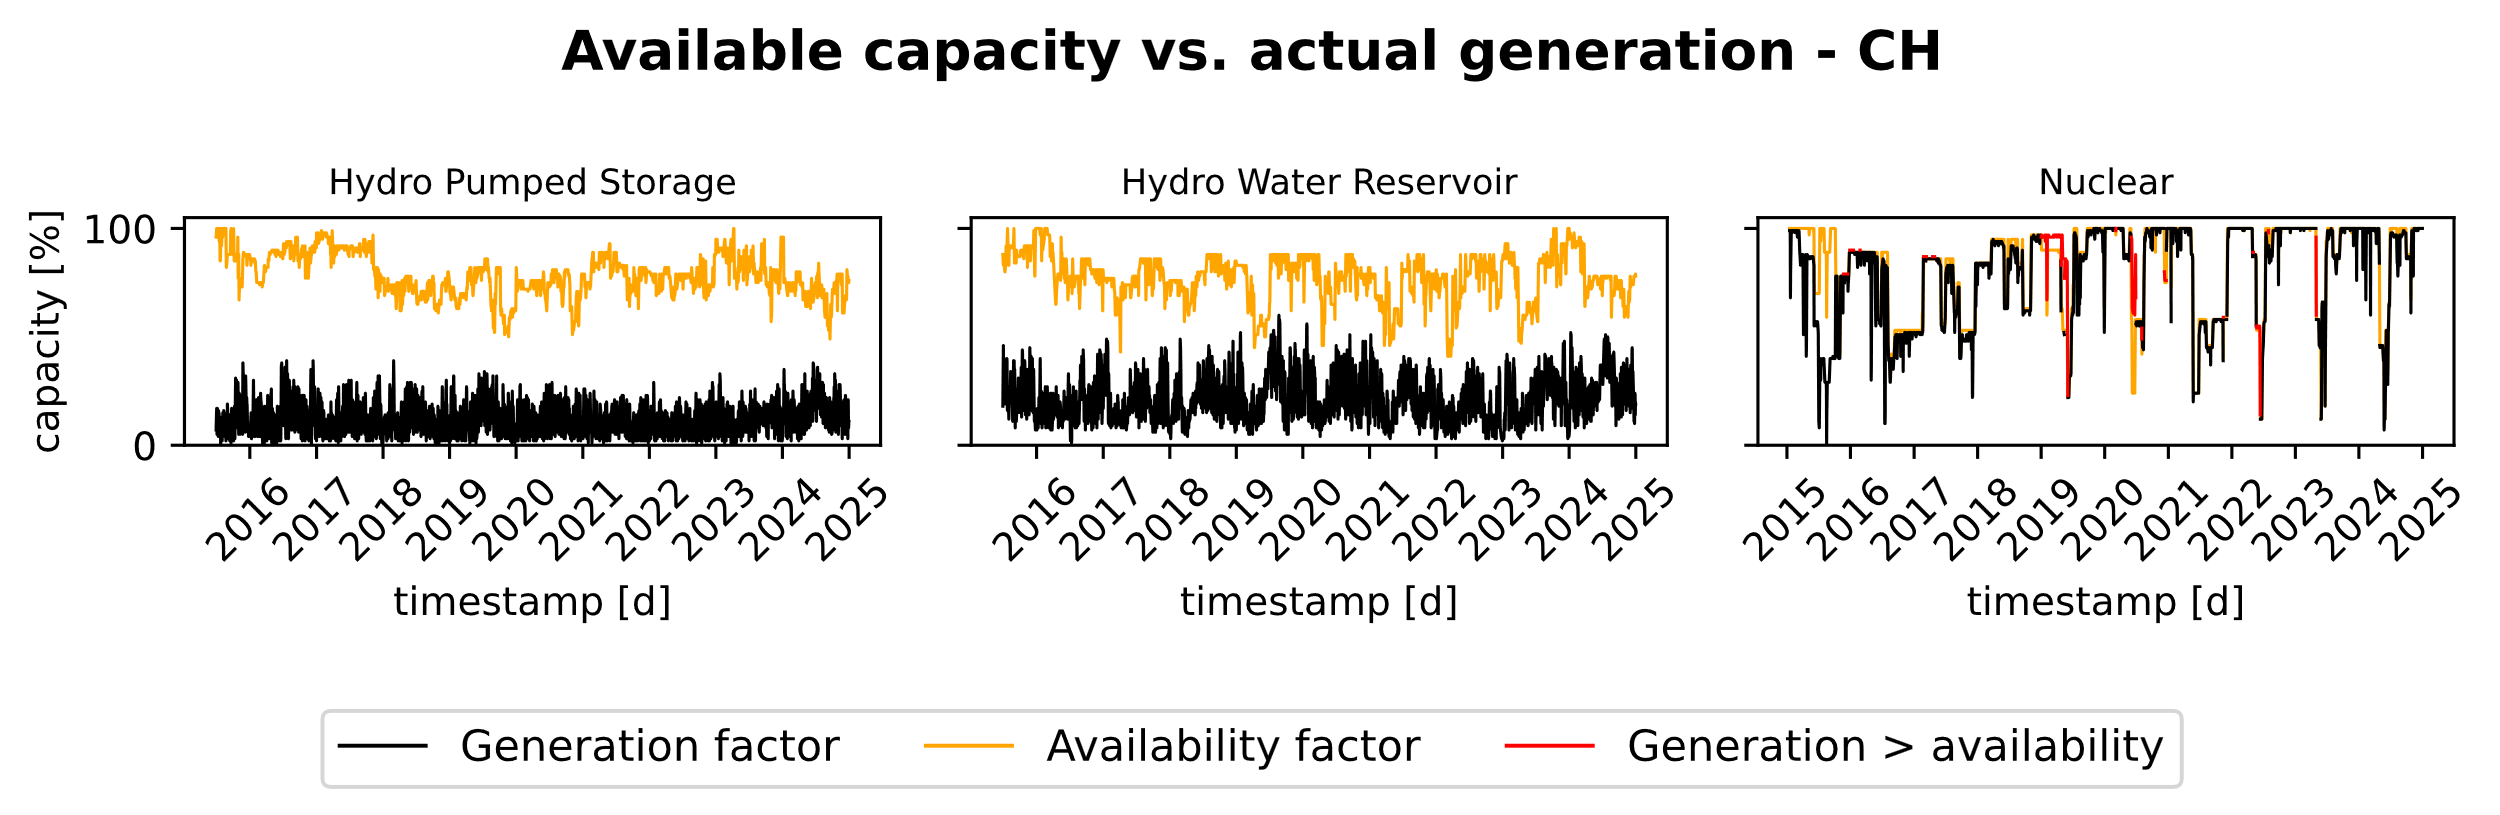


*Figure 19: Comparison of aggregated available capacity vs daily generation for Switzerland*


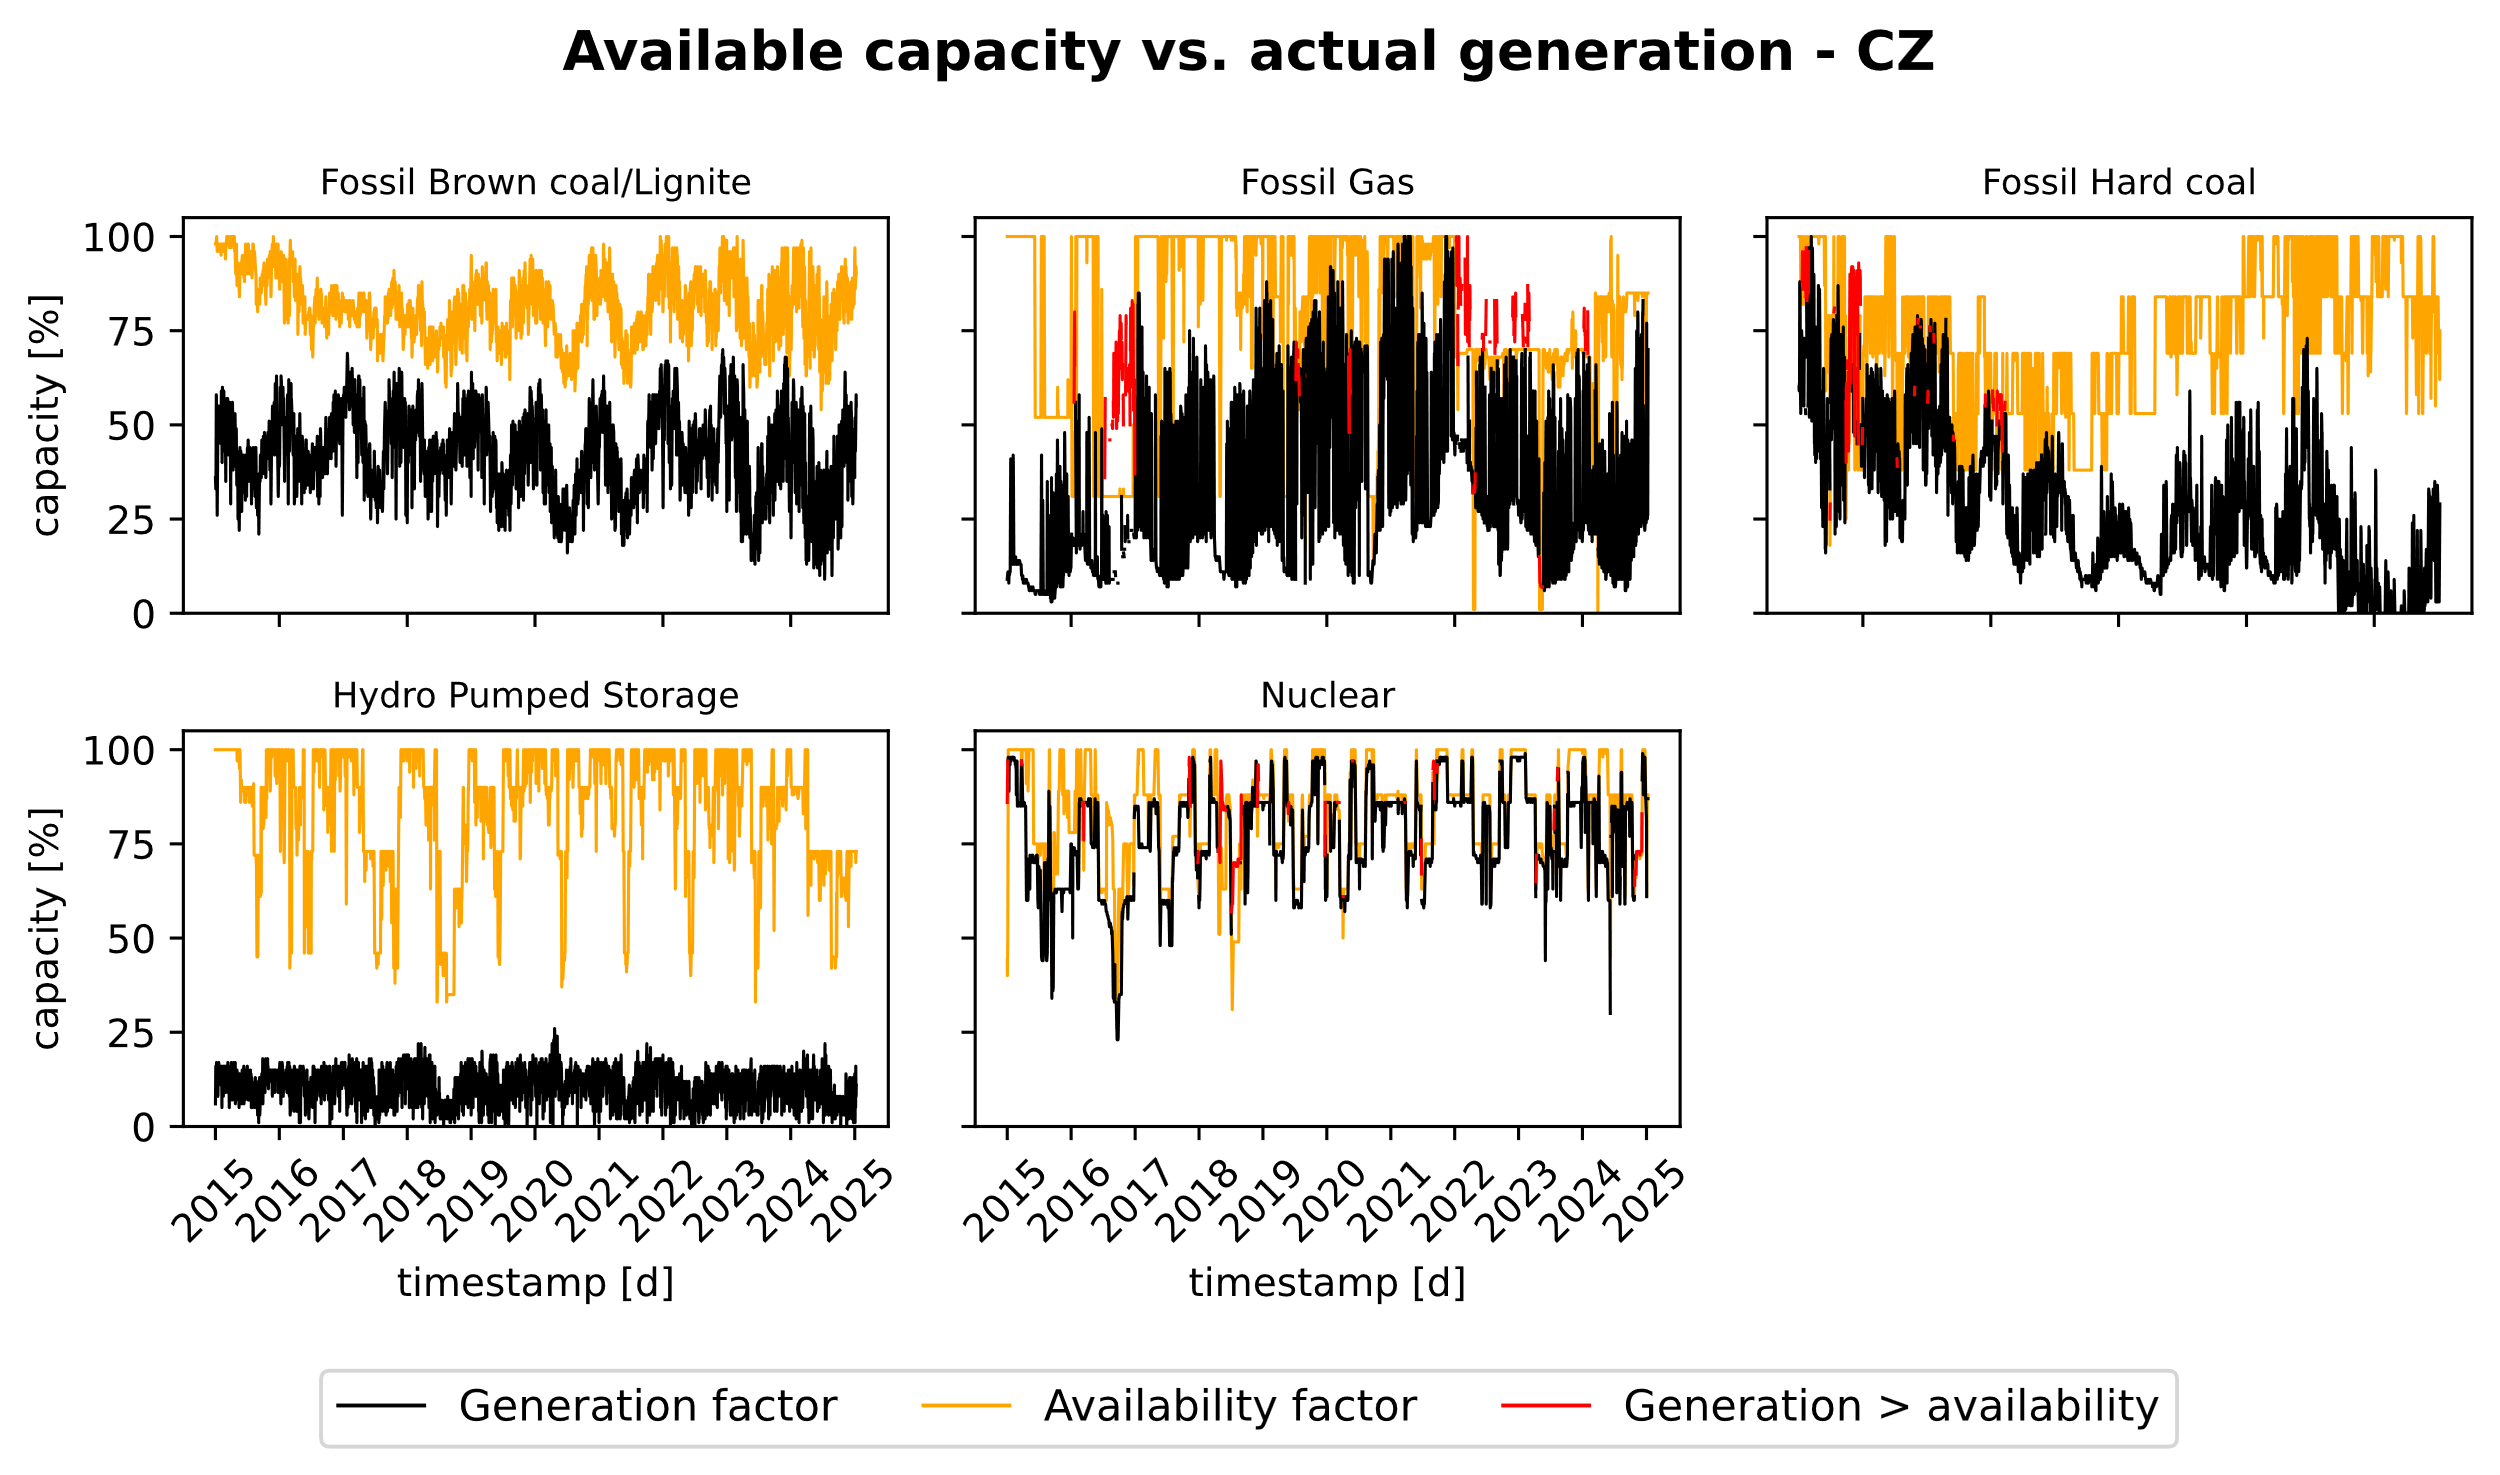


*Figure 20: Comparison of aggregated available capacity vs daily generation for Czech Republic*


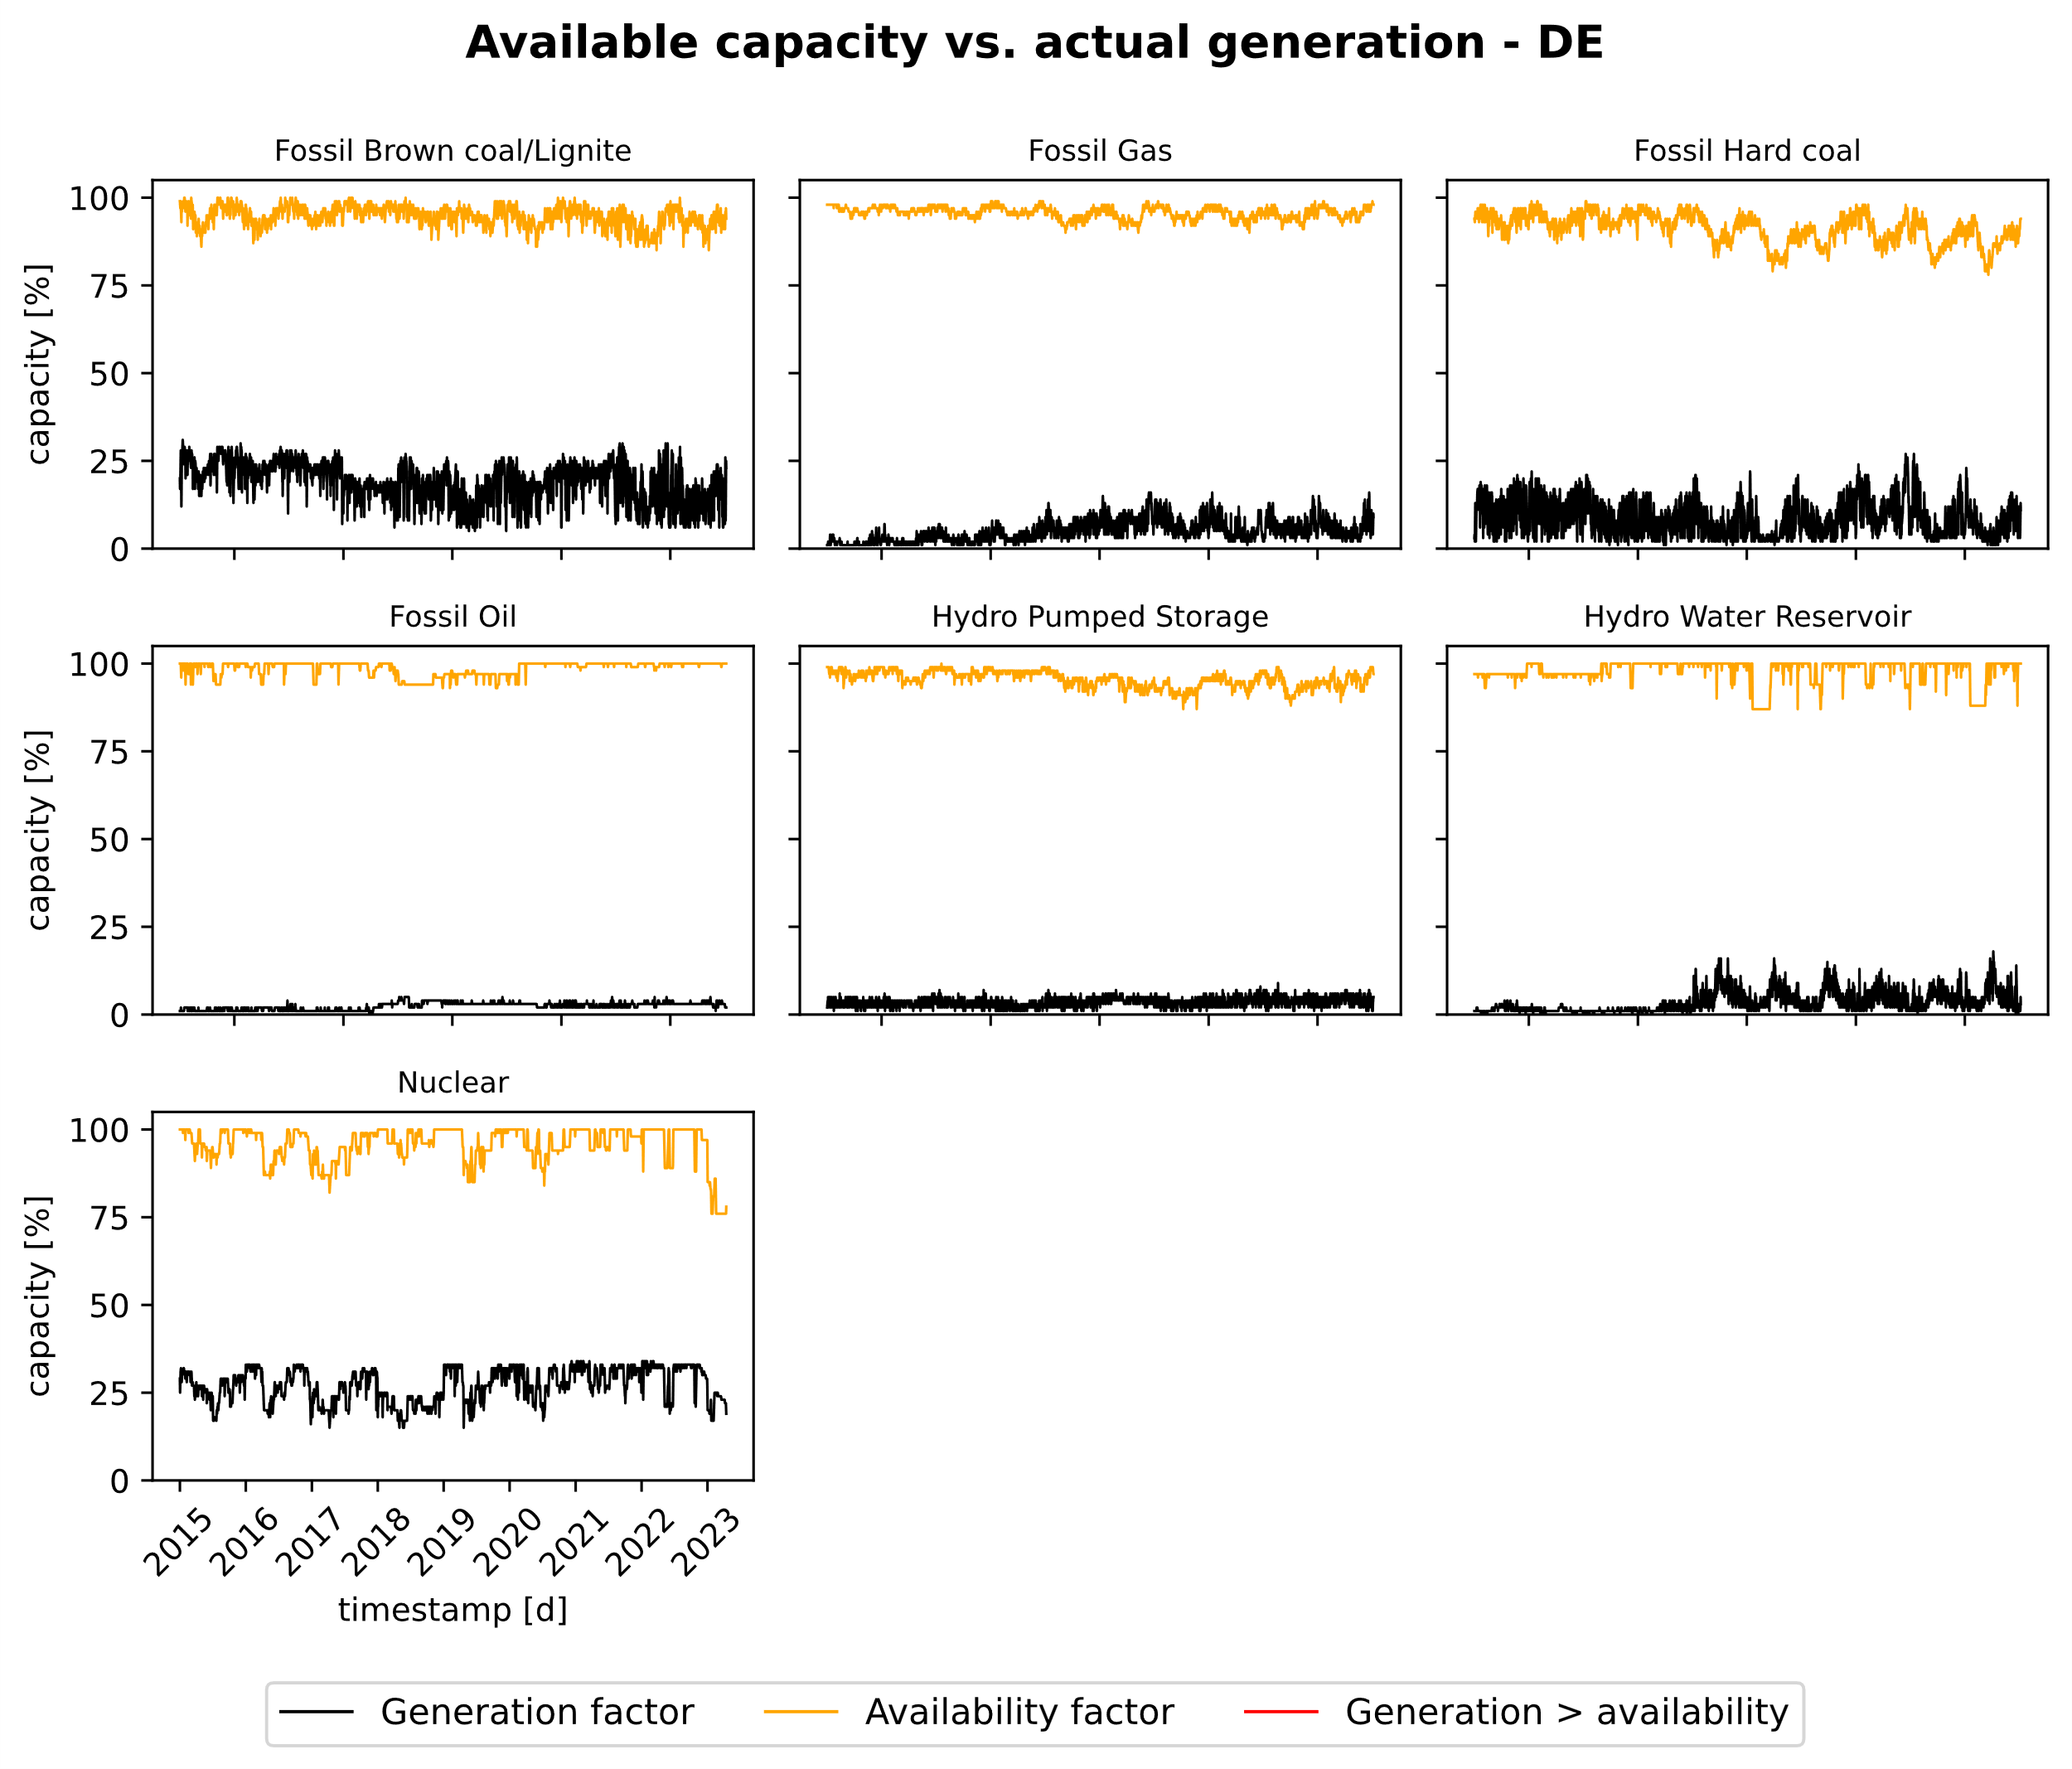


*Figure 21: Comparison of aggregated available capacity vs daily generation for Germany*


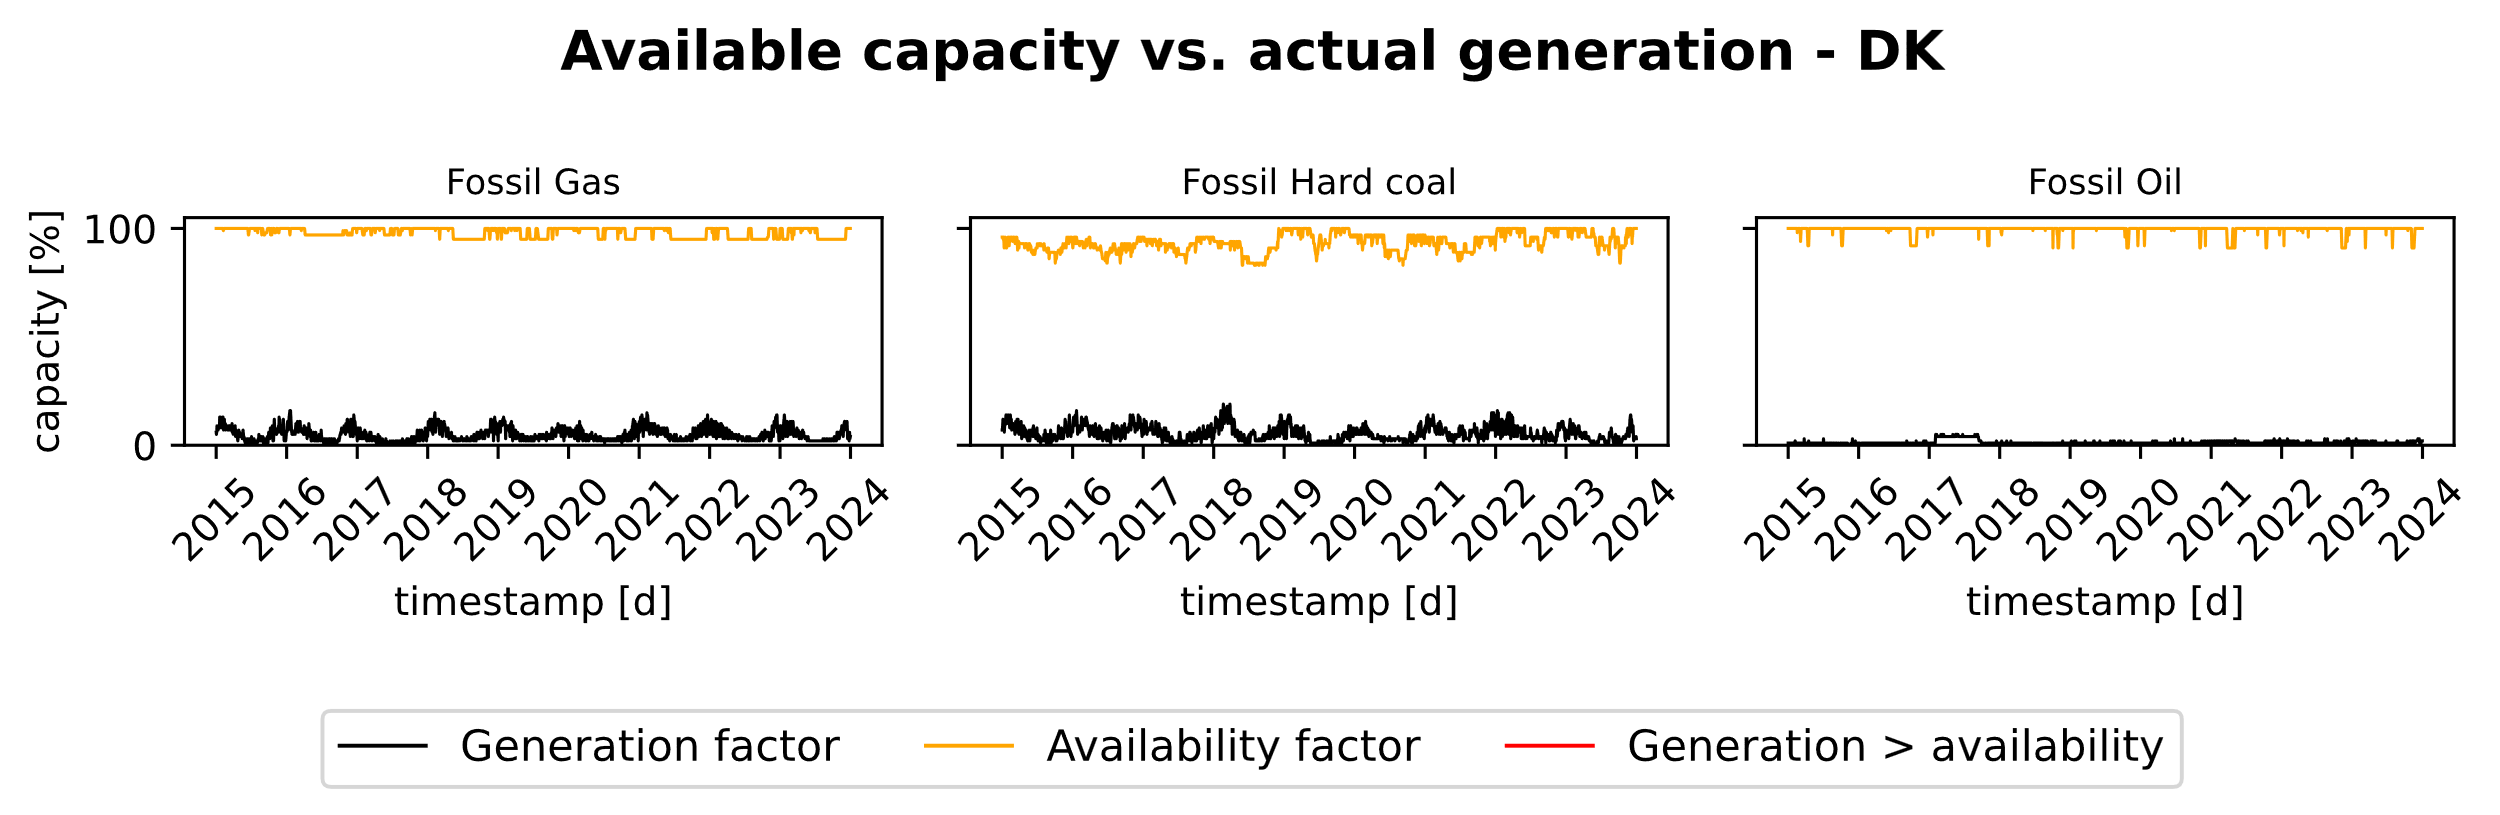


*Figure 22: Comparison of aggregated available capacity vs daily generation for Denmark*


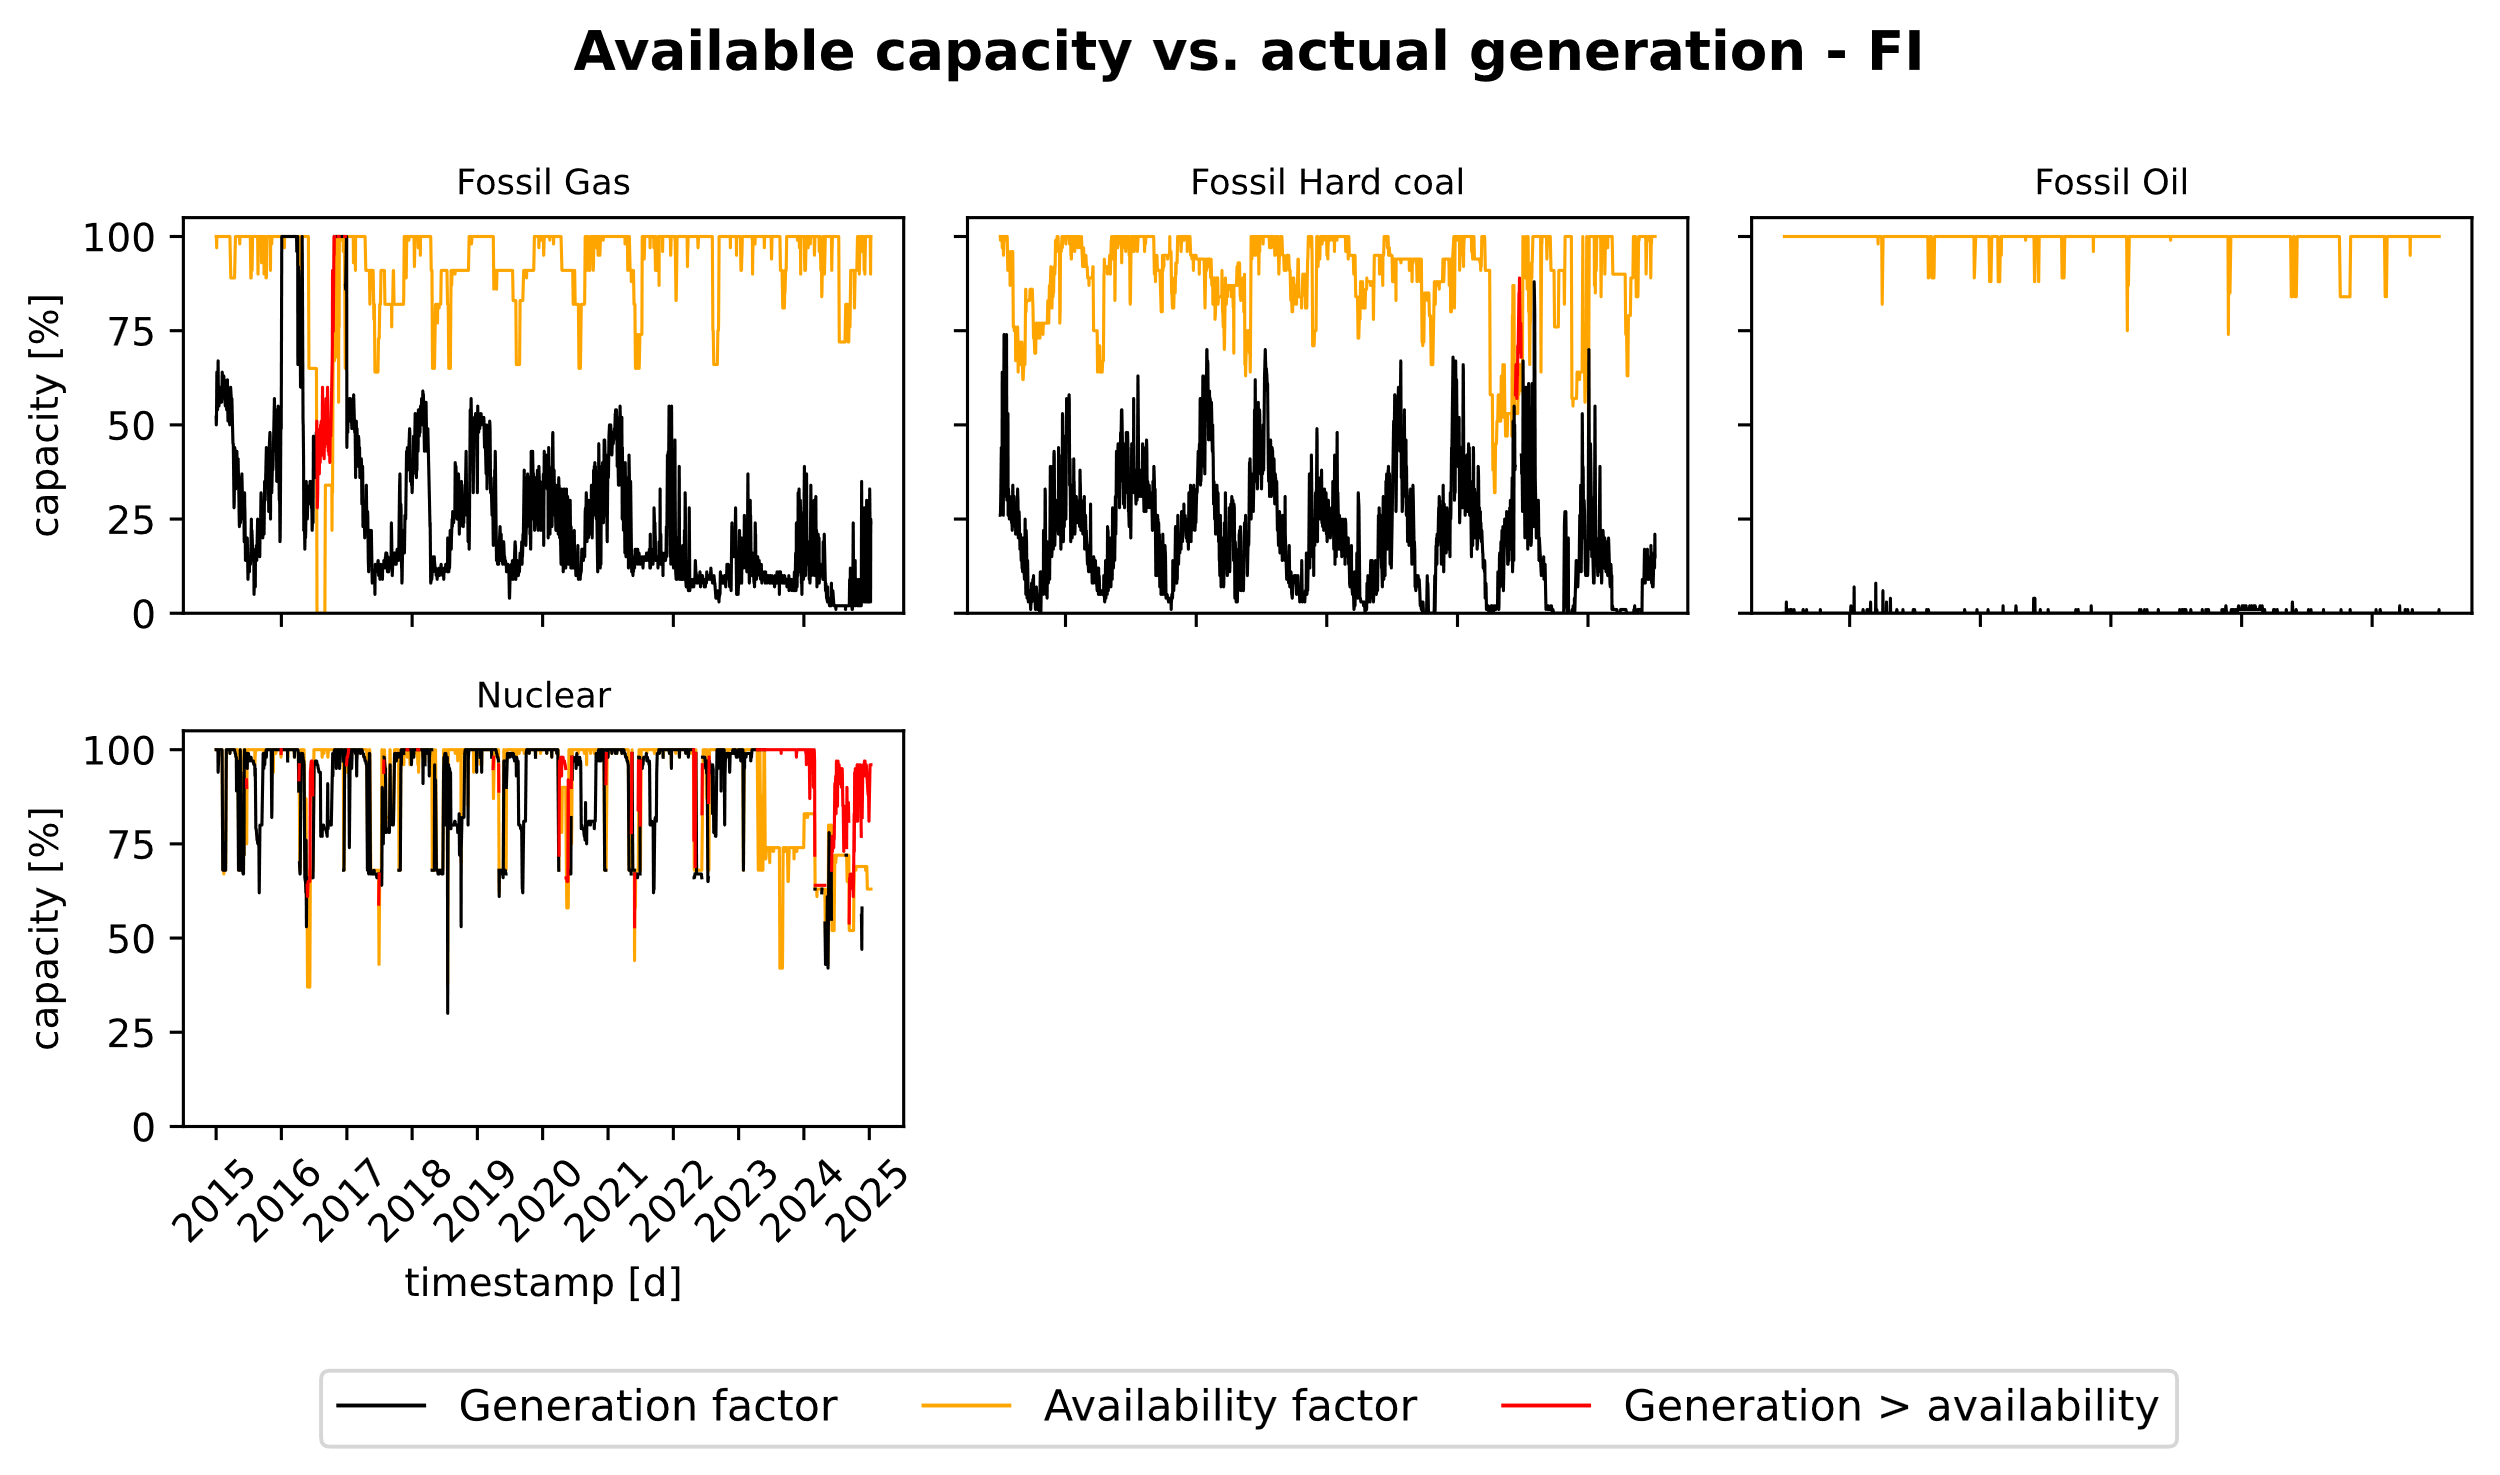


*Figure 23: Comparison of aggregated available capacity vs daily generation for Finland*


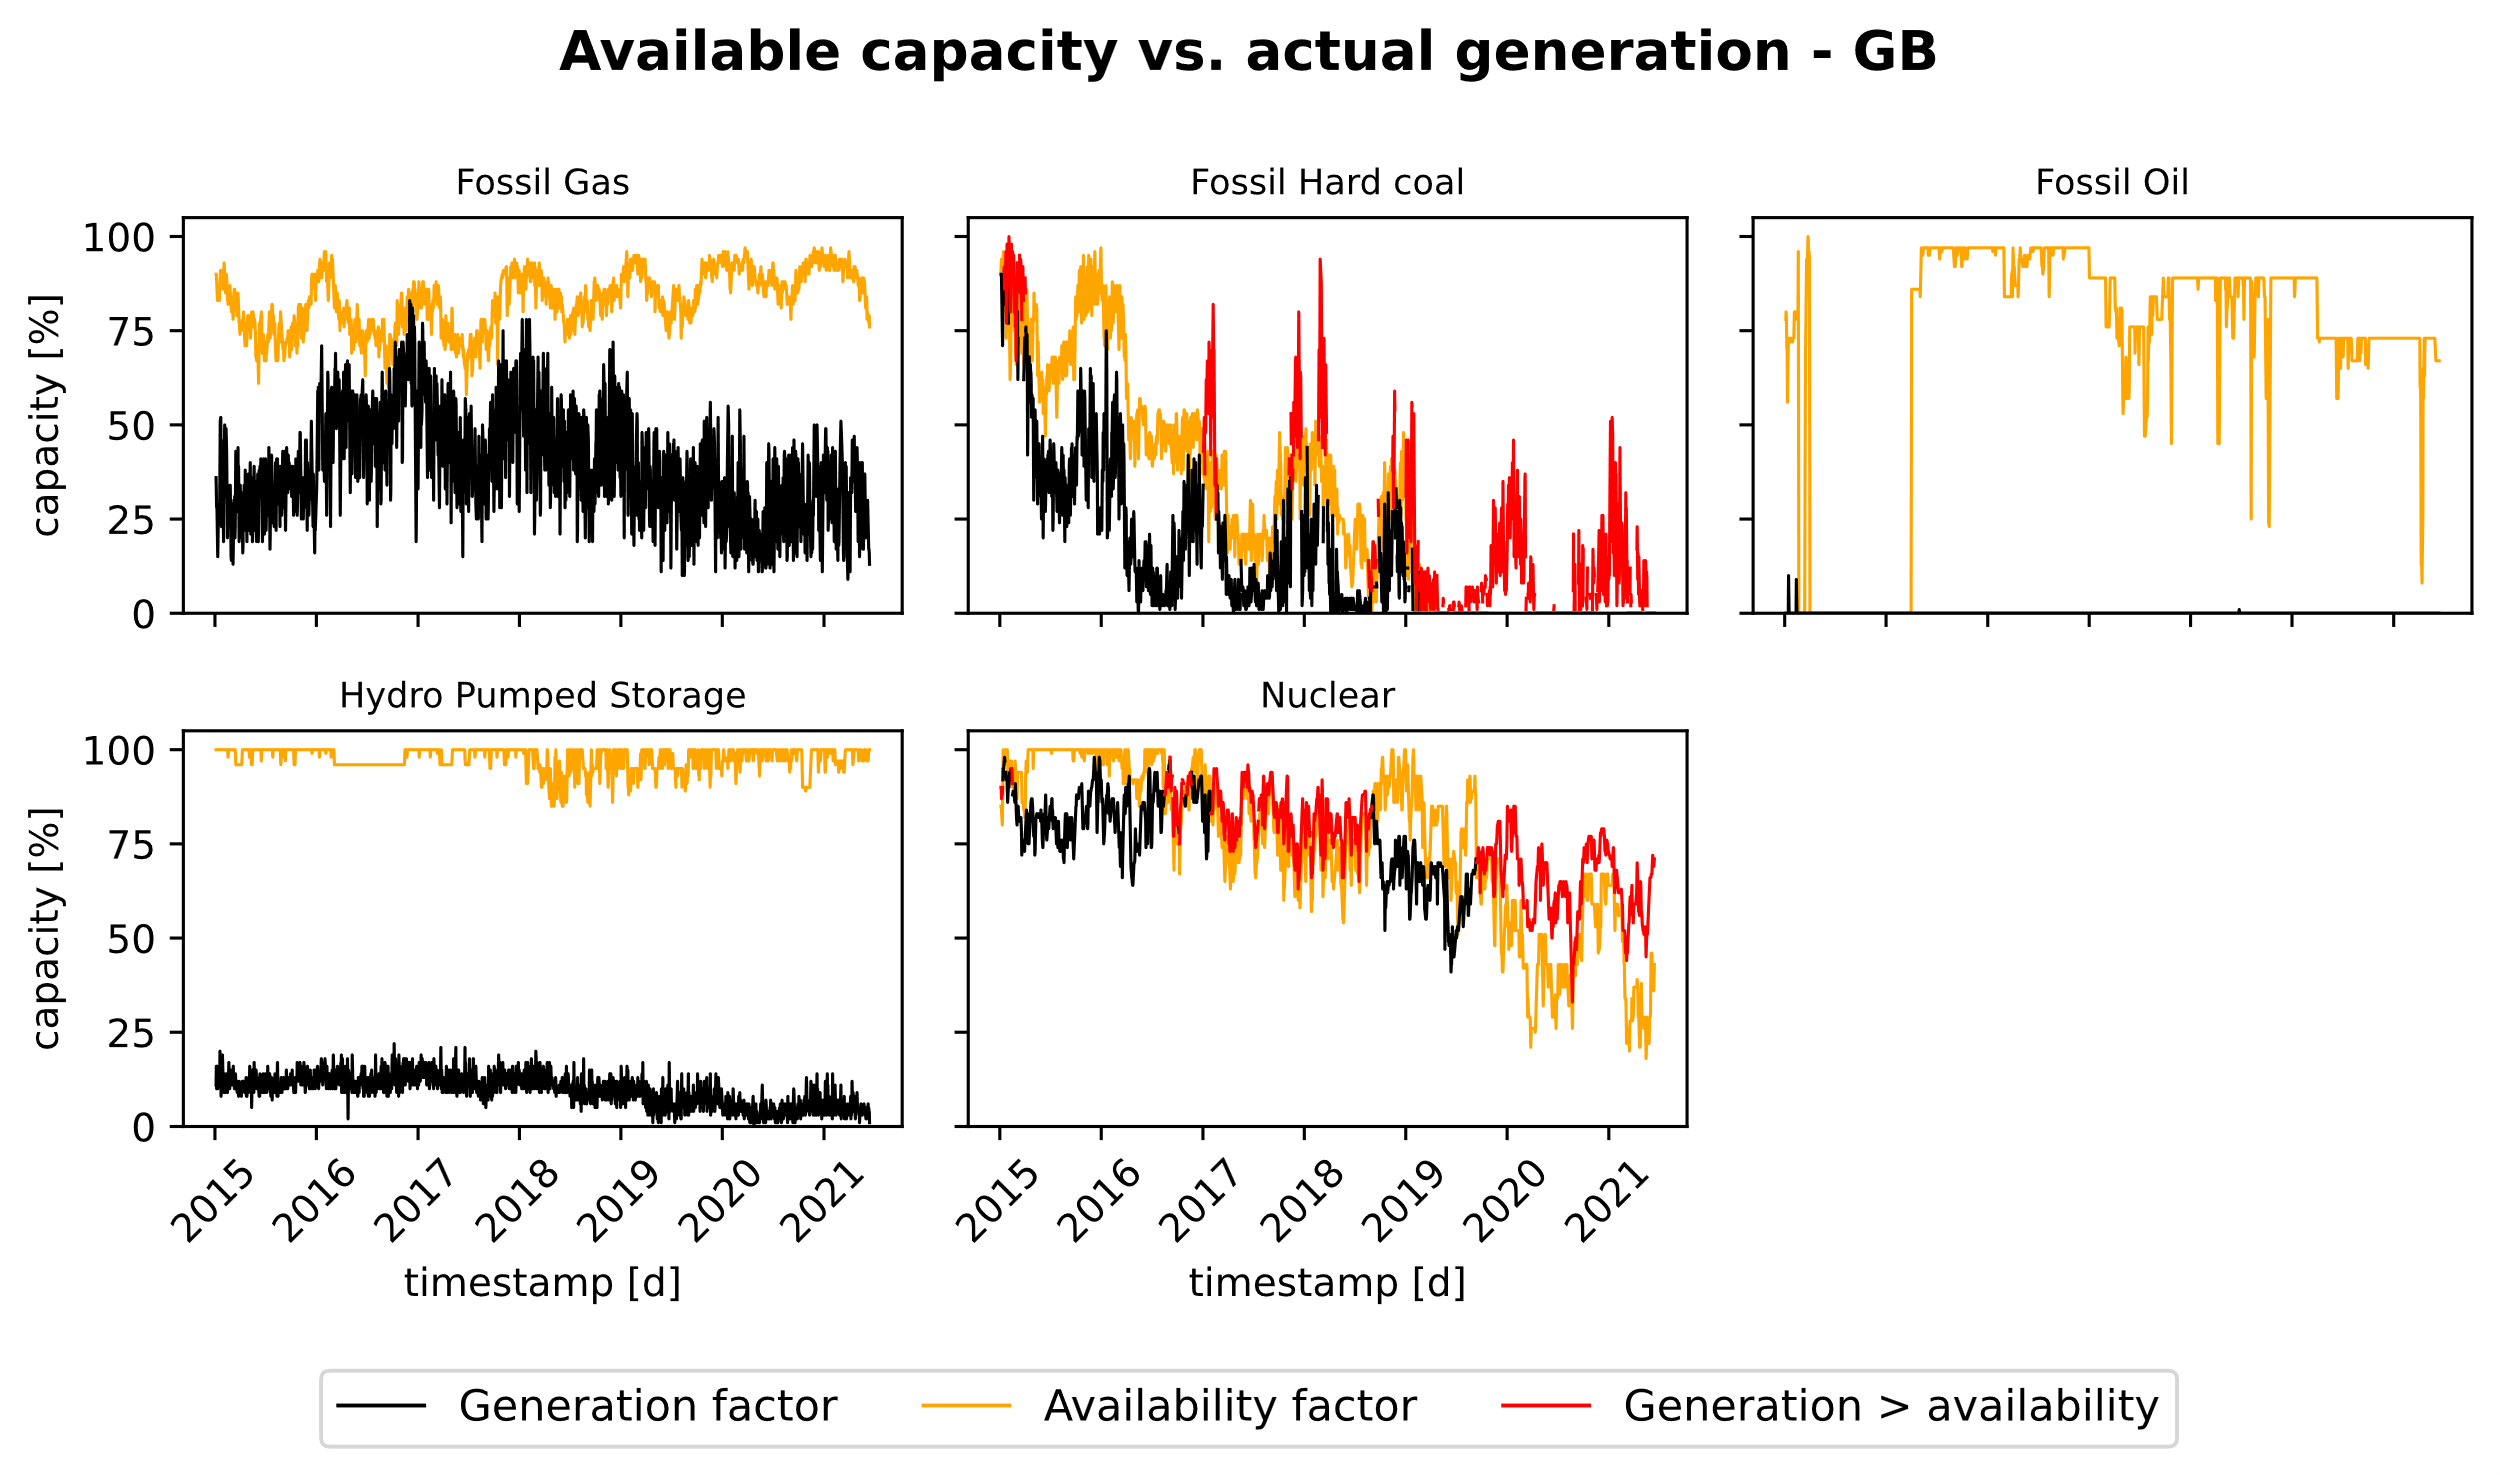


*Figure 24: Comparison of aggregated available capacity vs daily generation for Great Britain*


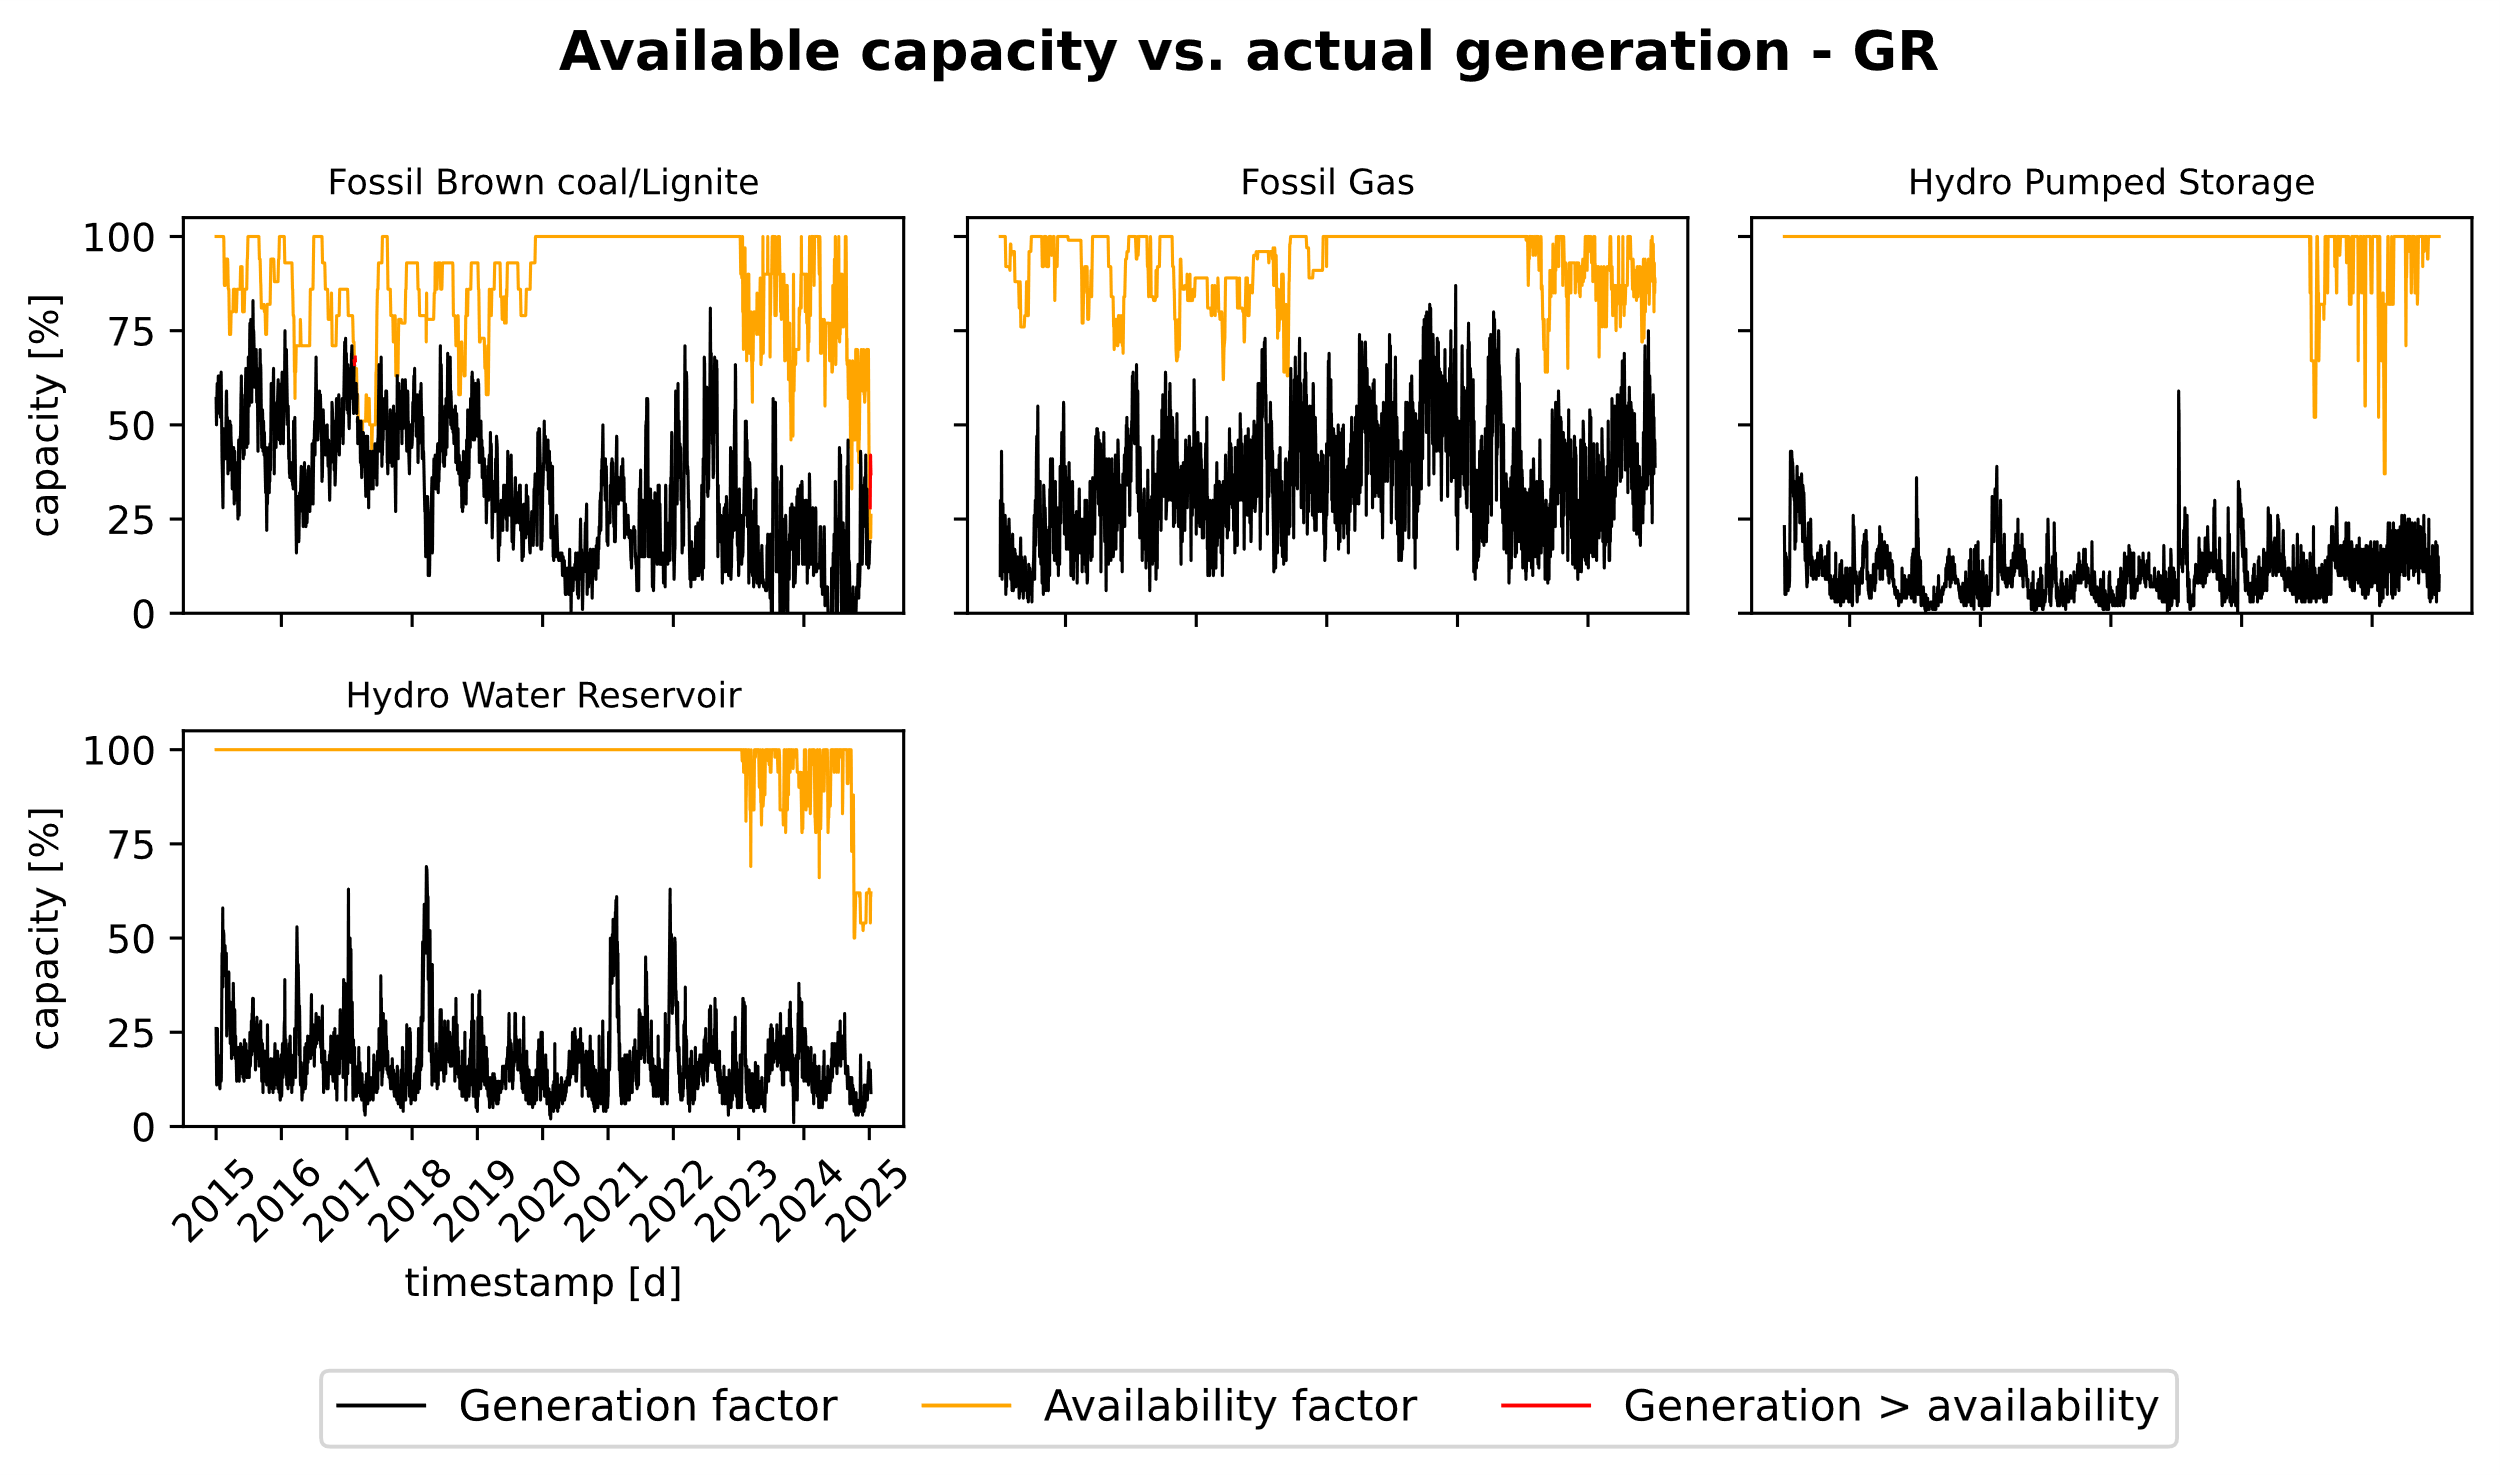


*Figure 25: Comparison of aggregated available capacity vs daily generation for Greece*


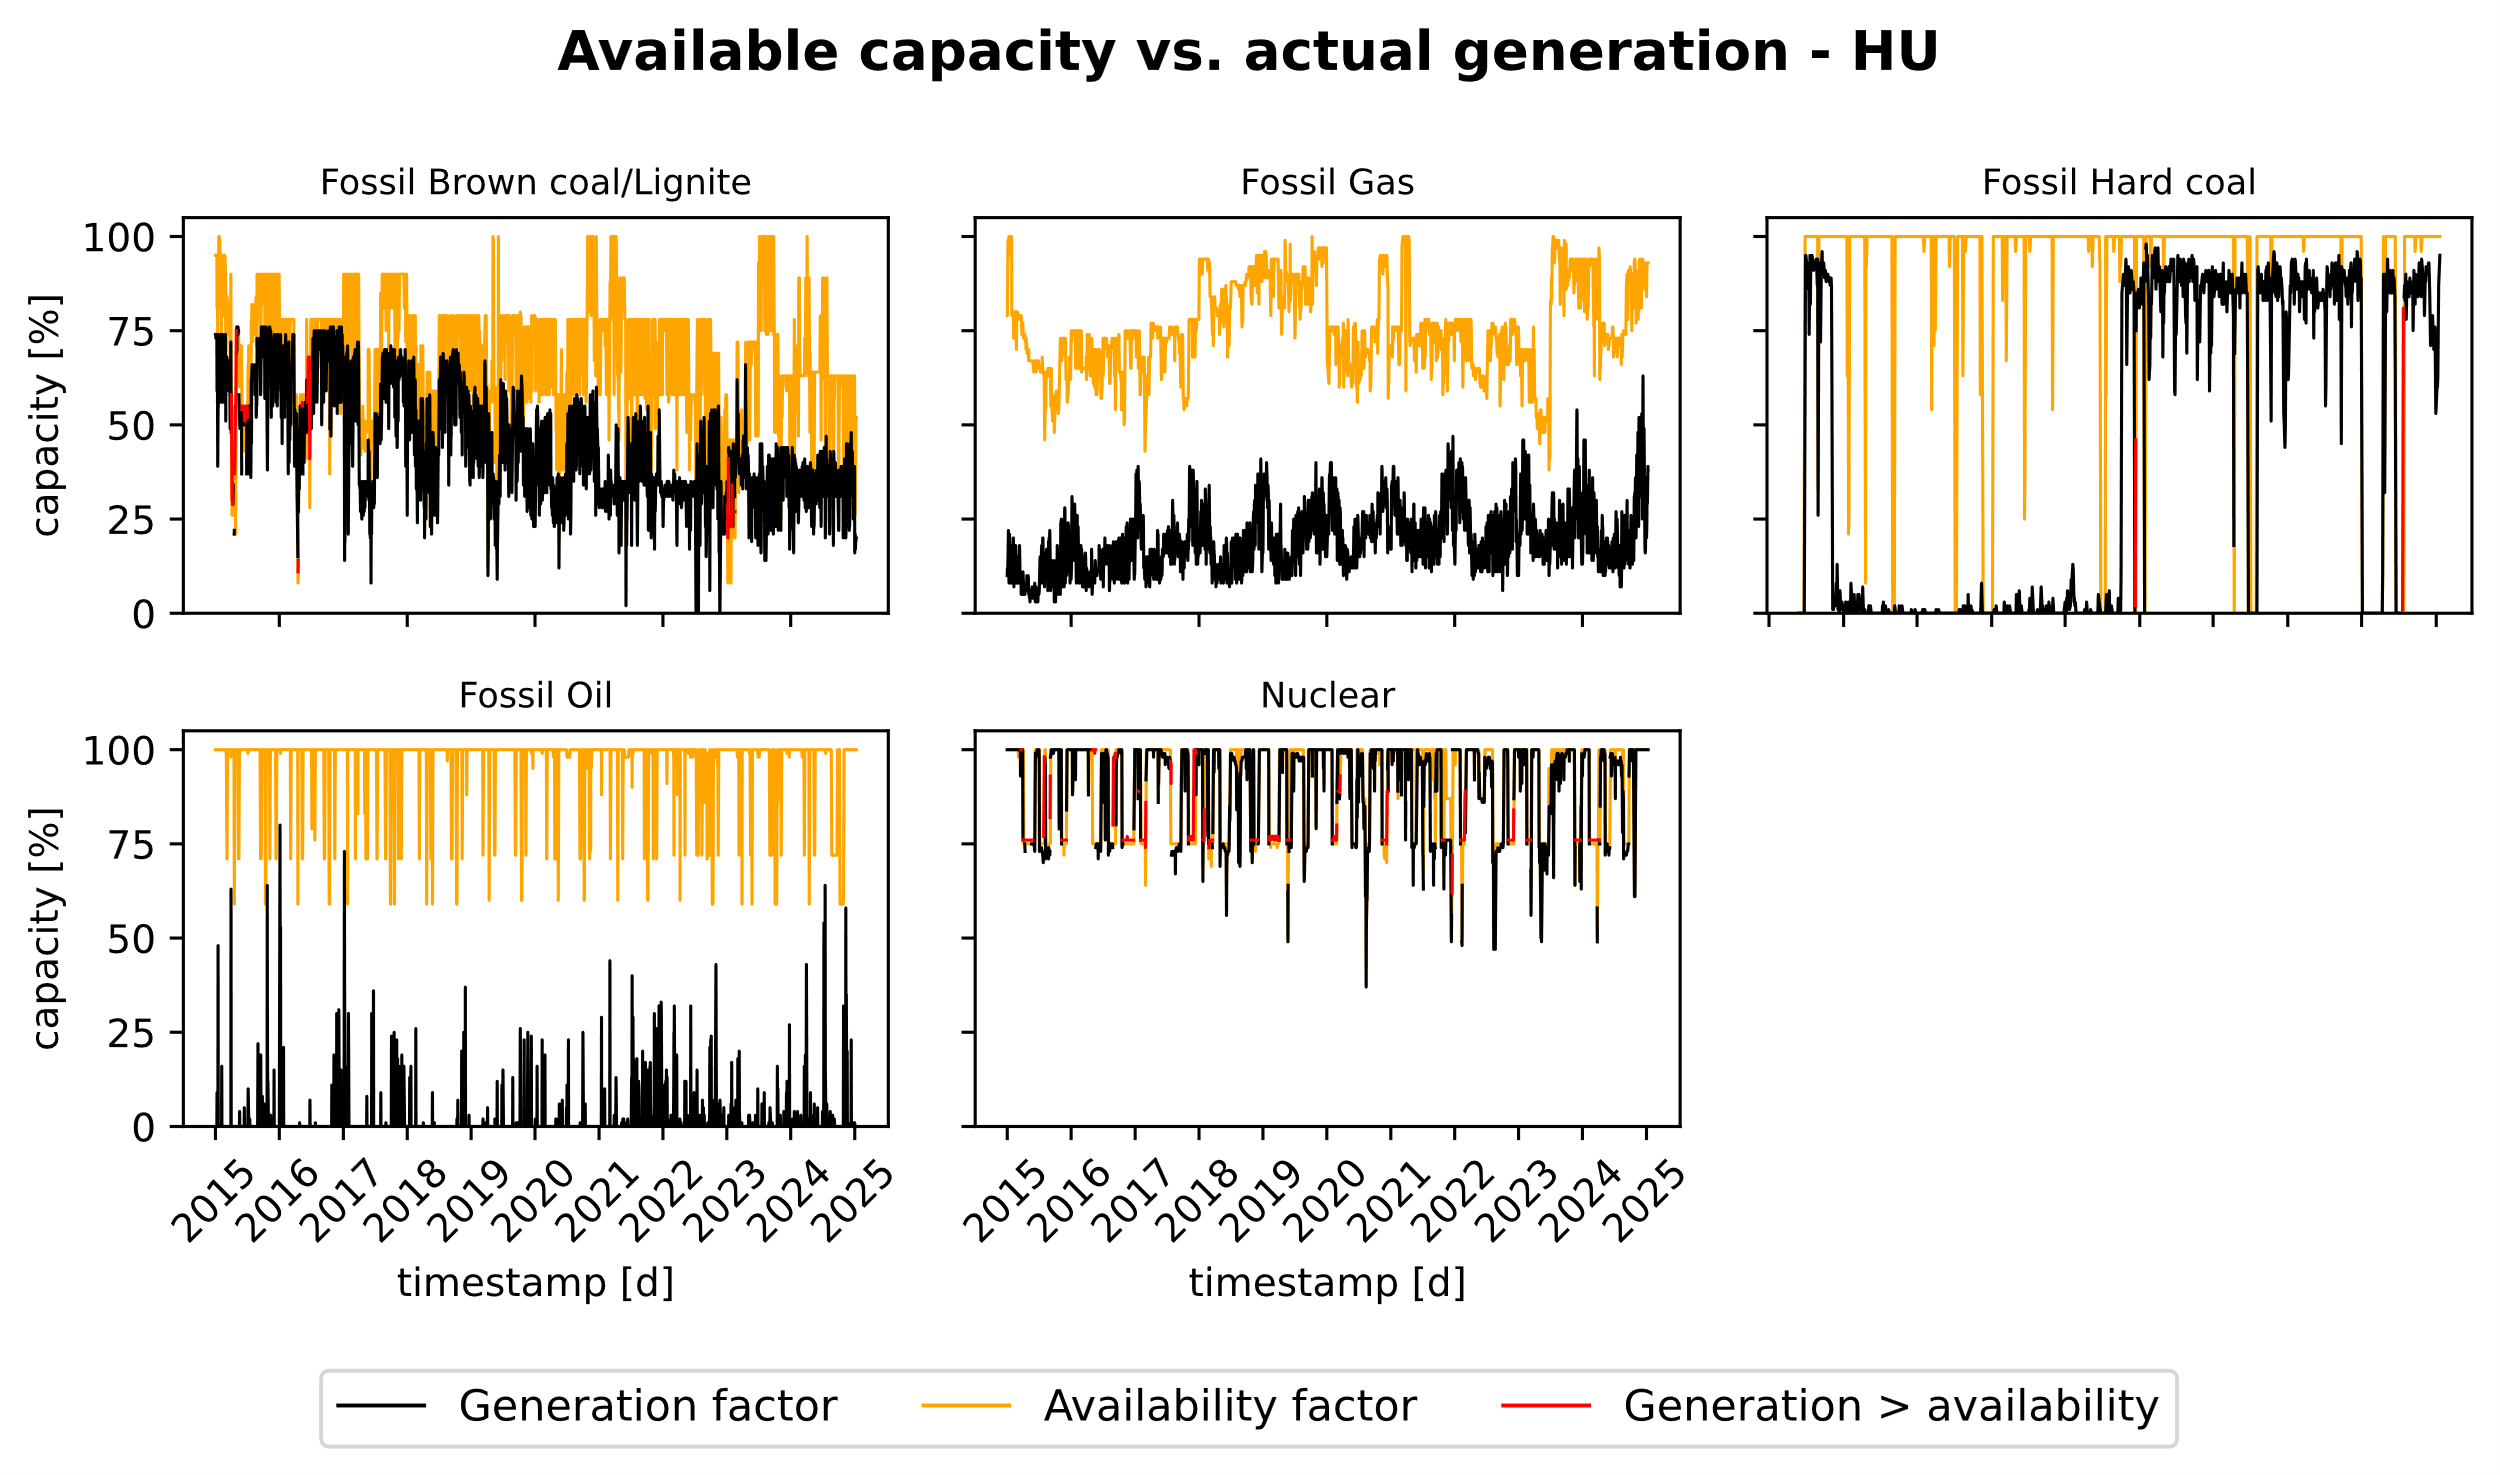


*Figure 26: Comparison of aggregated available capacity vs daily generation for Hungary*


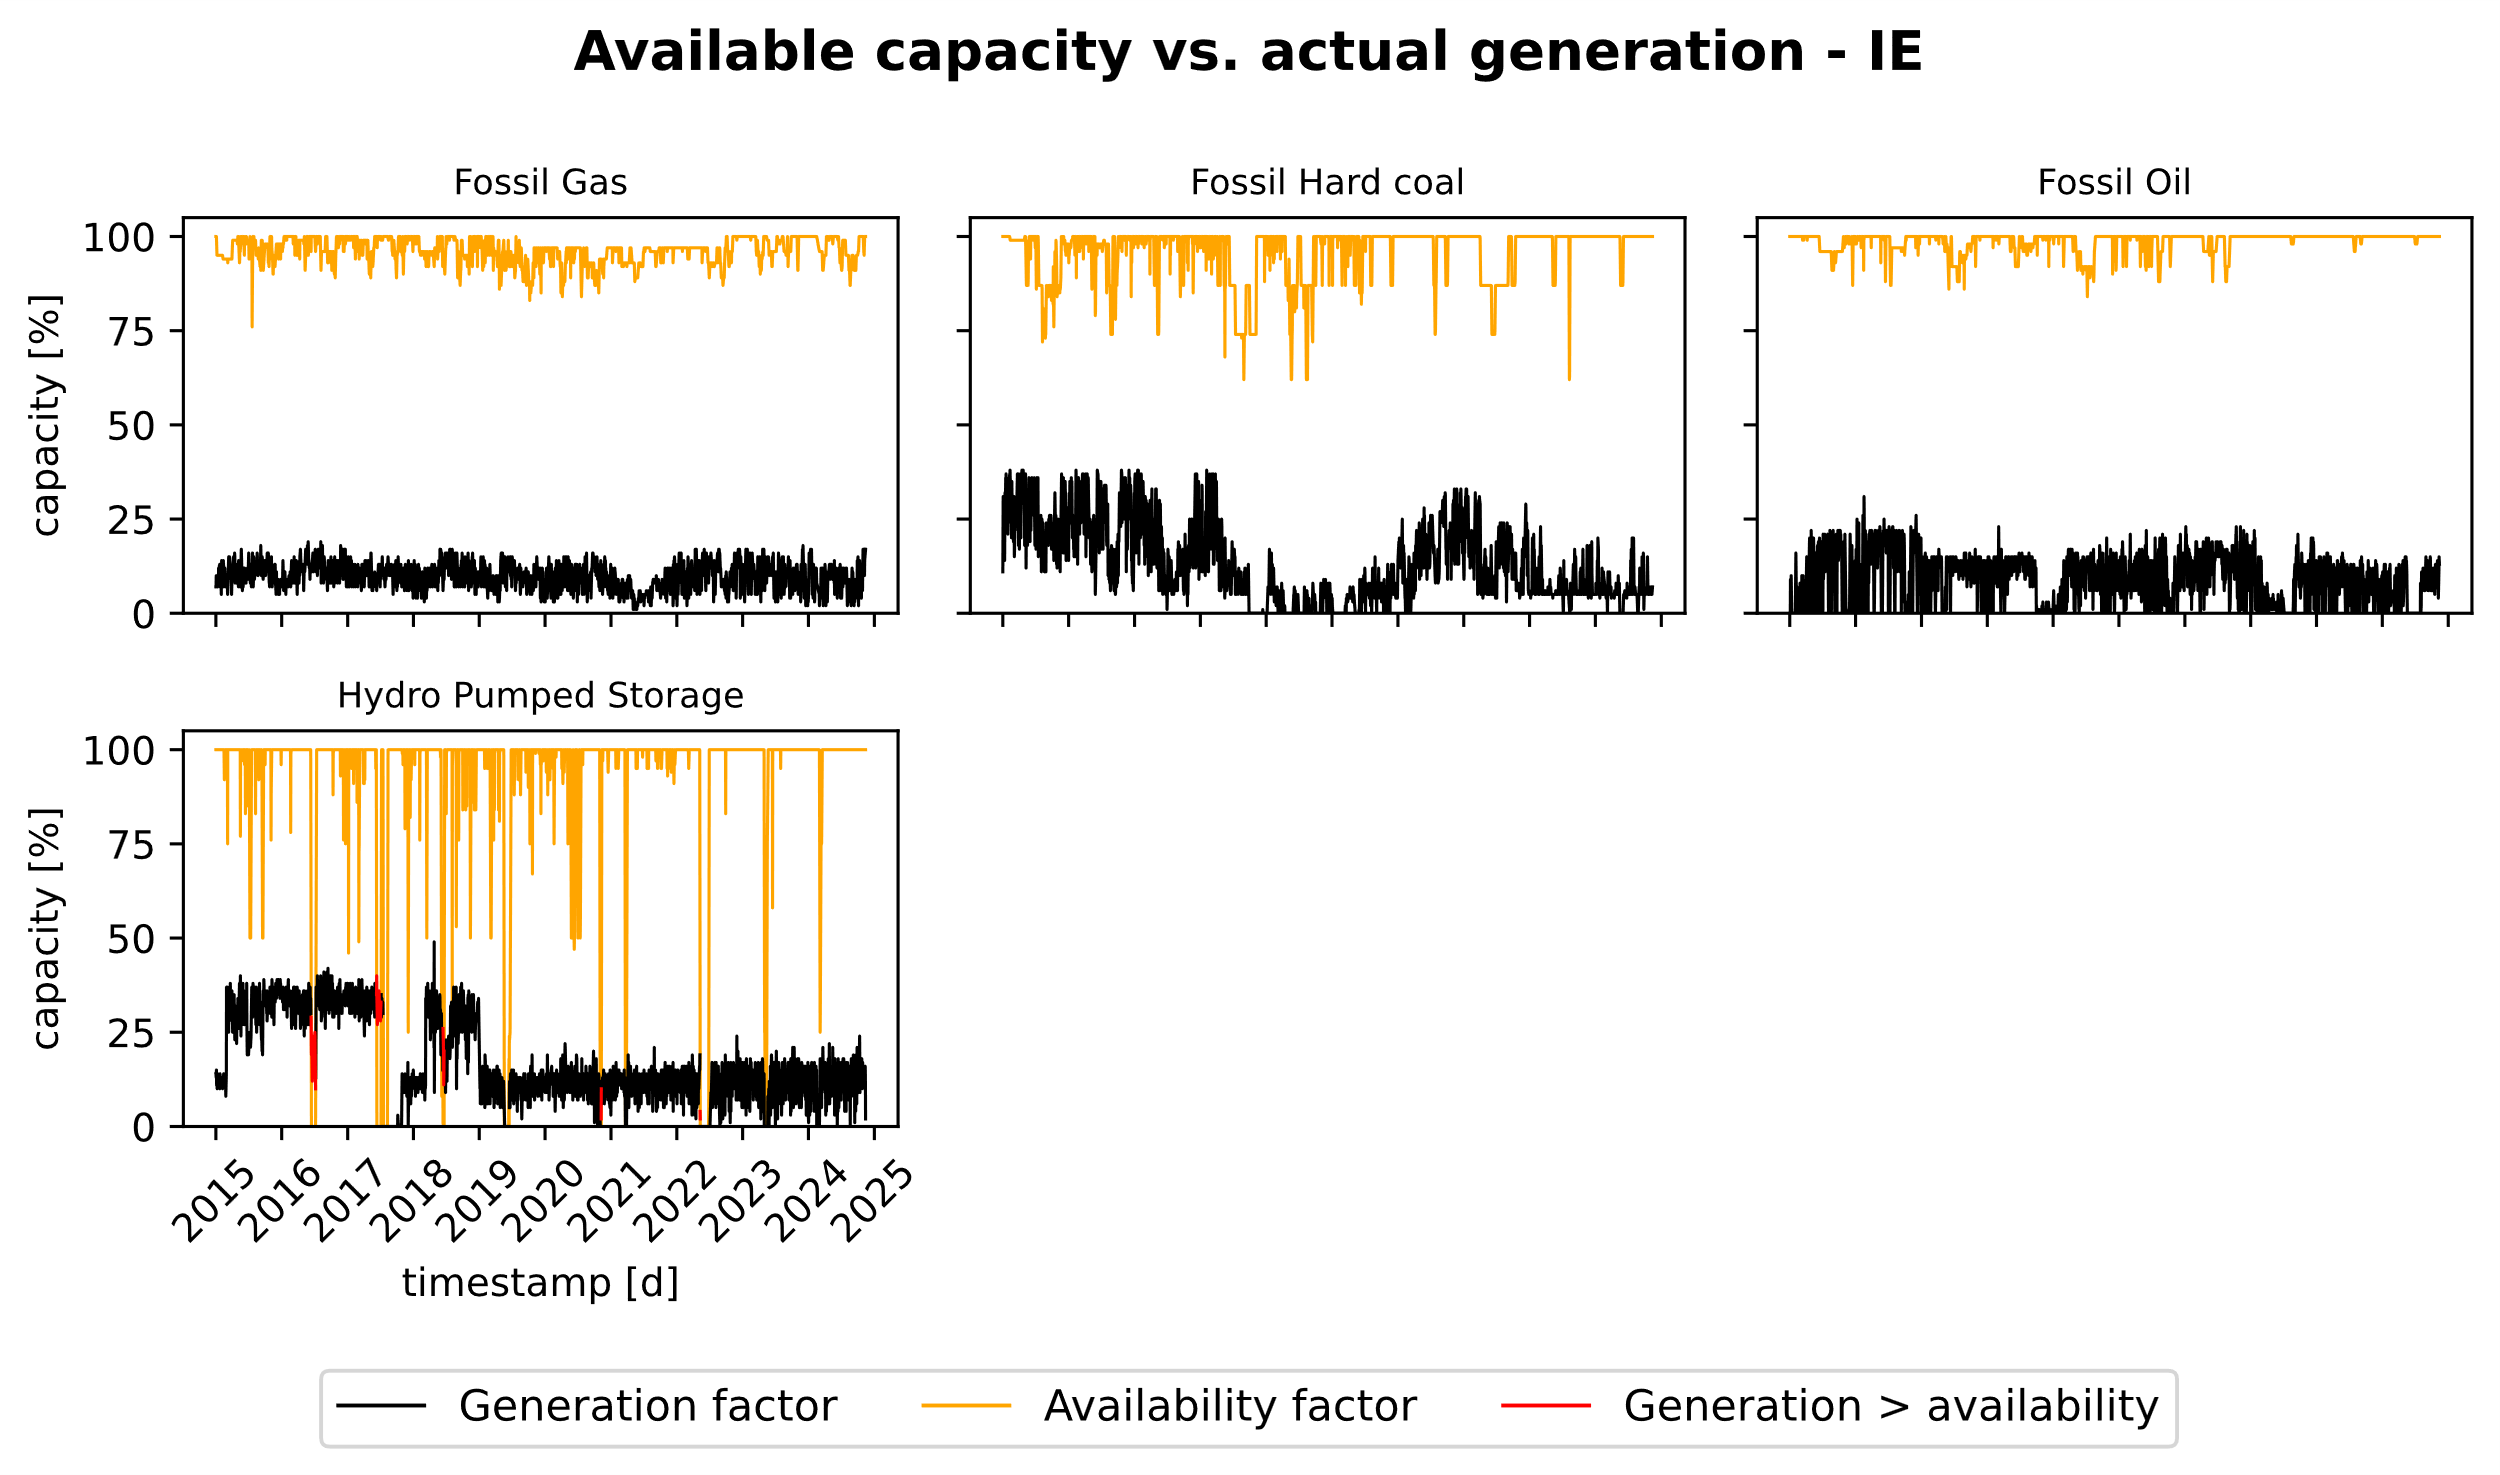


*Figure 27: Comparison of aggregated available capacity vs daily generation for Ireland*


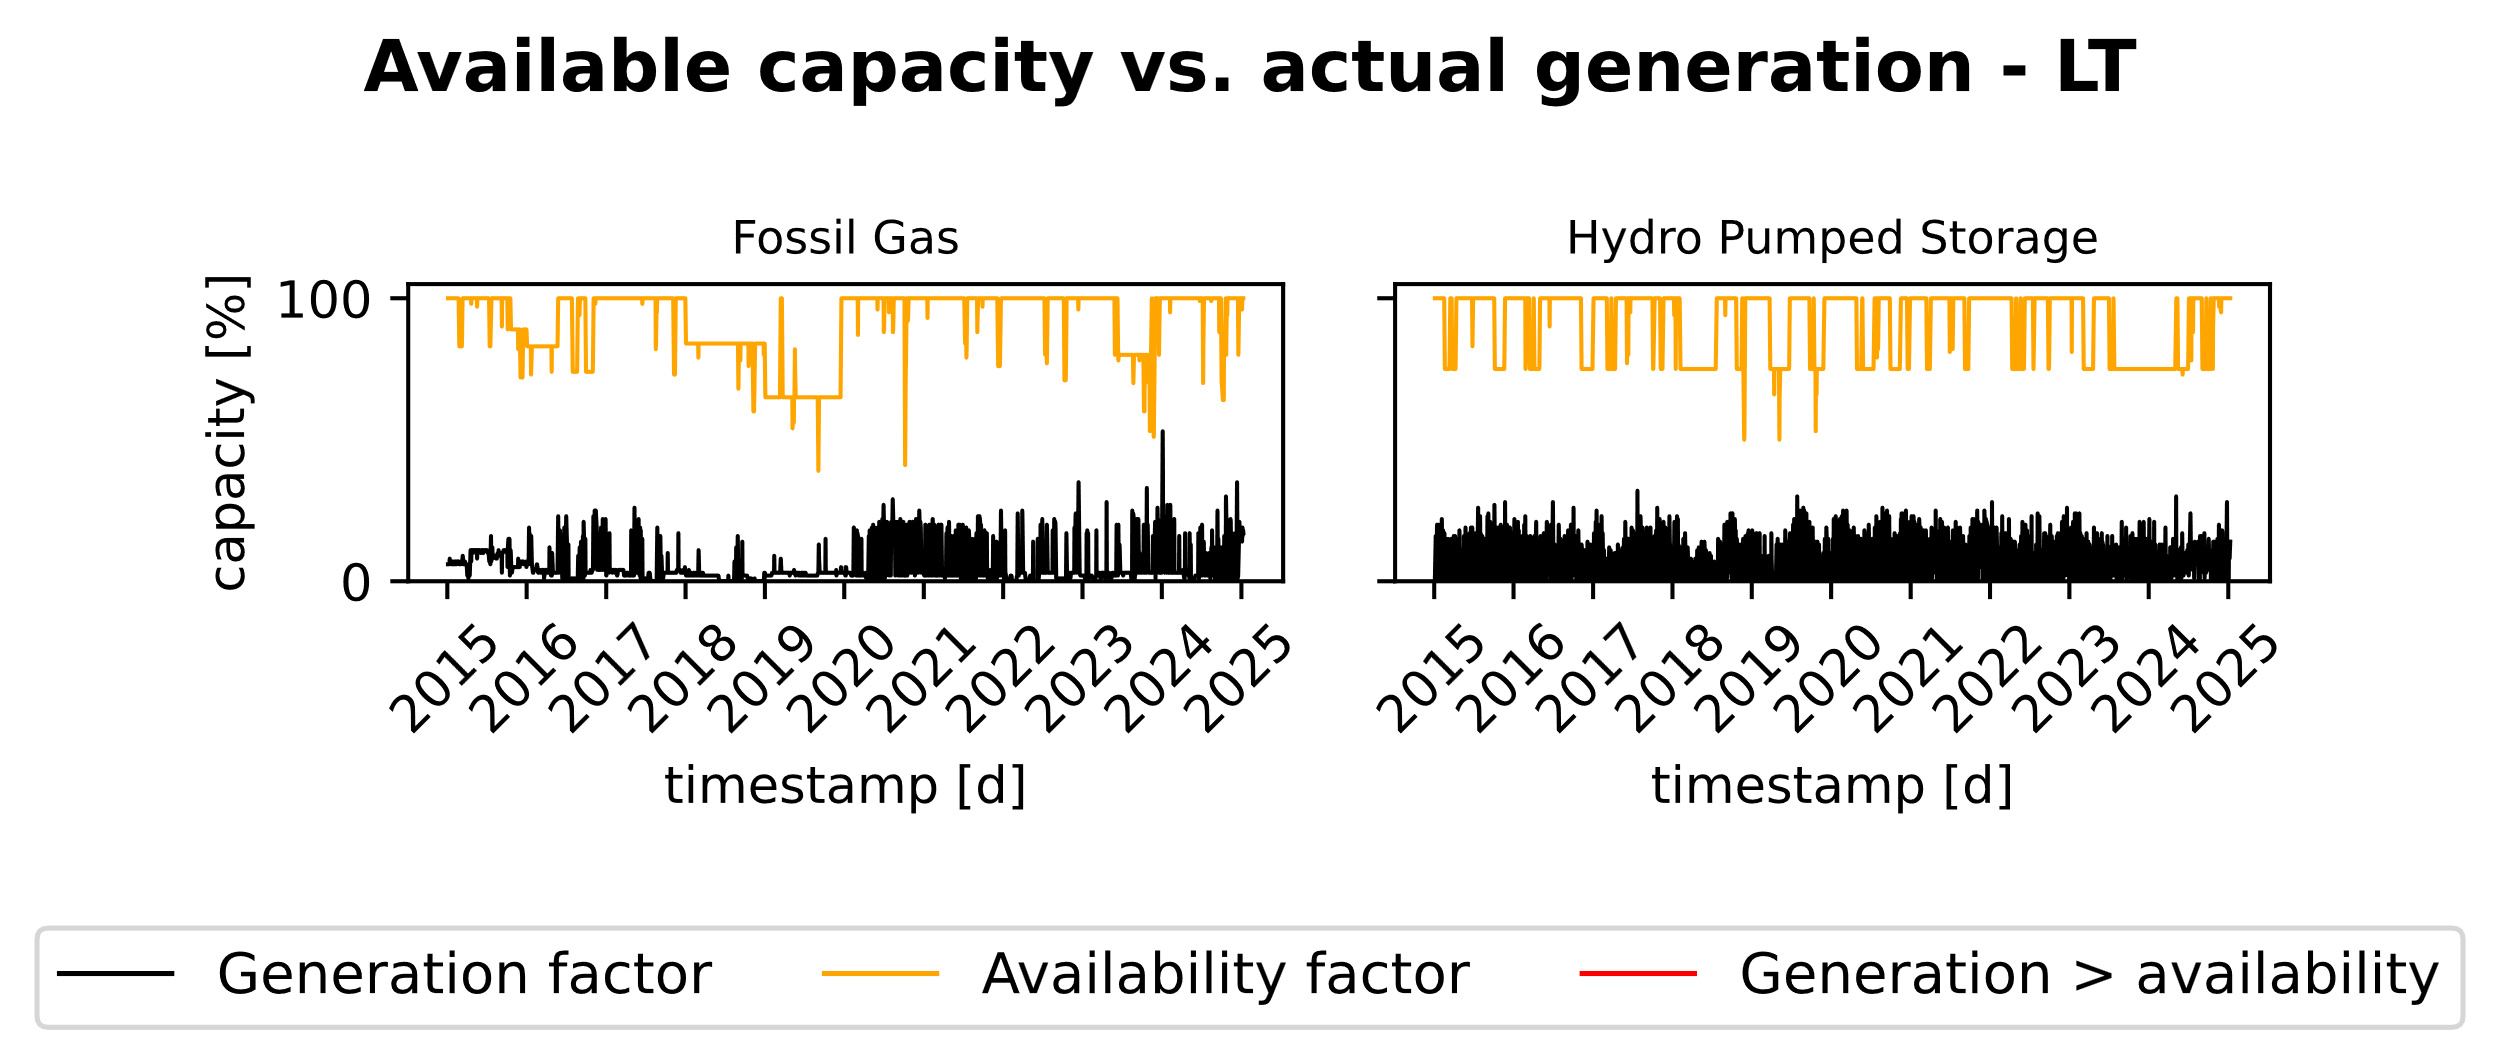


*Figure 28: Comparison of aggregated available capacity vs daily generation for Lithuania*


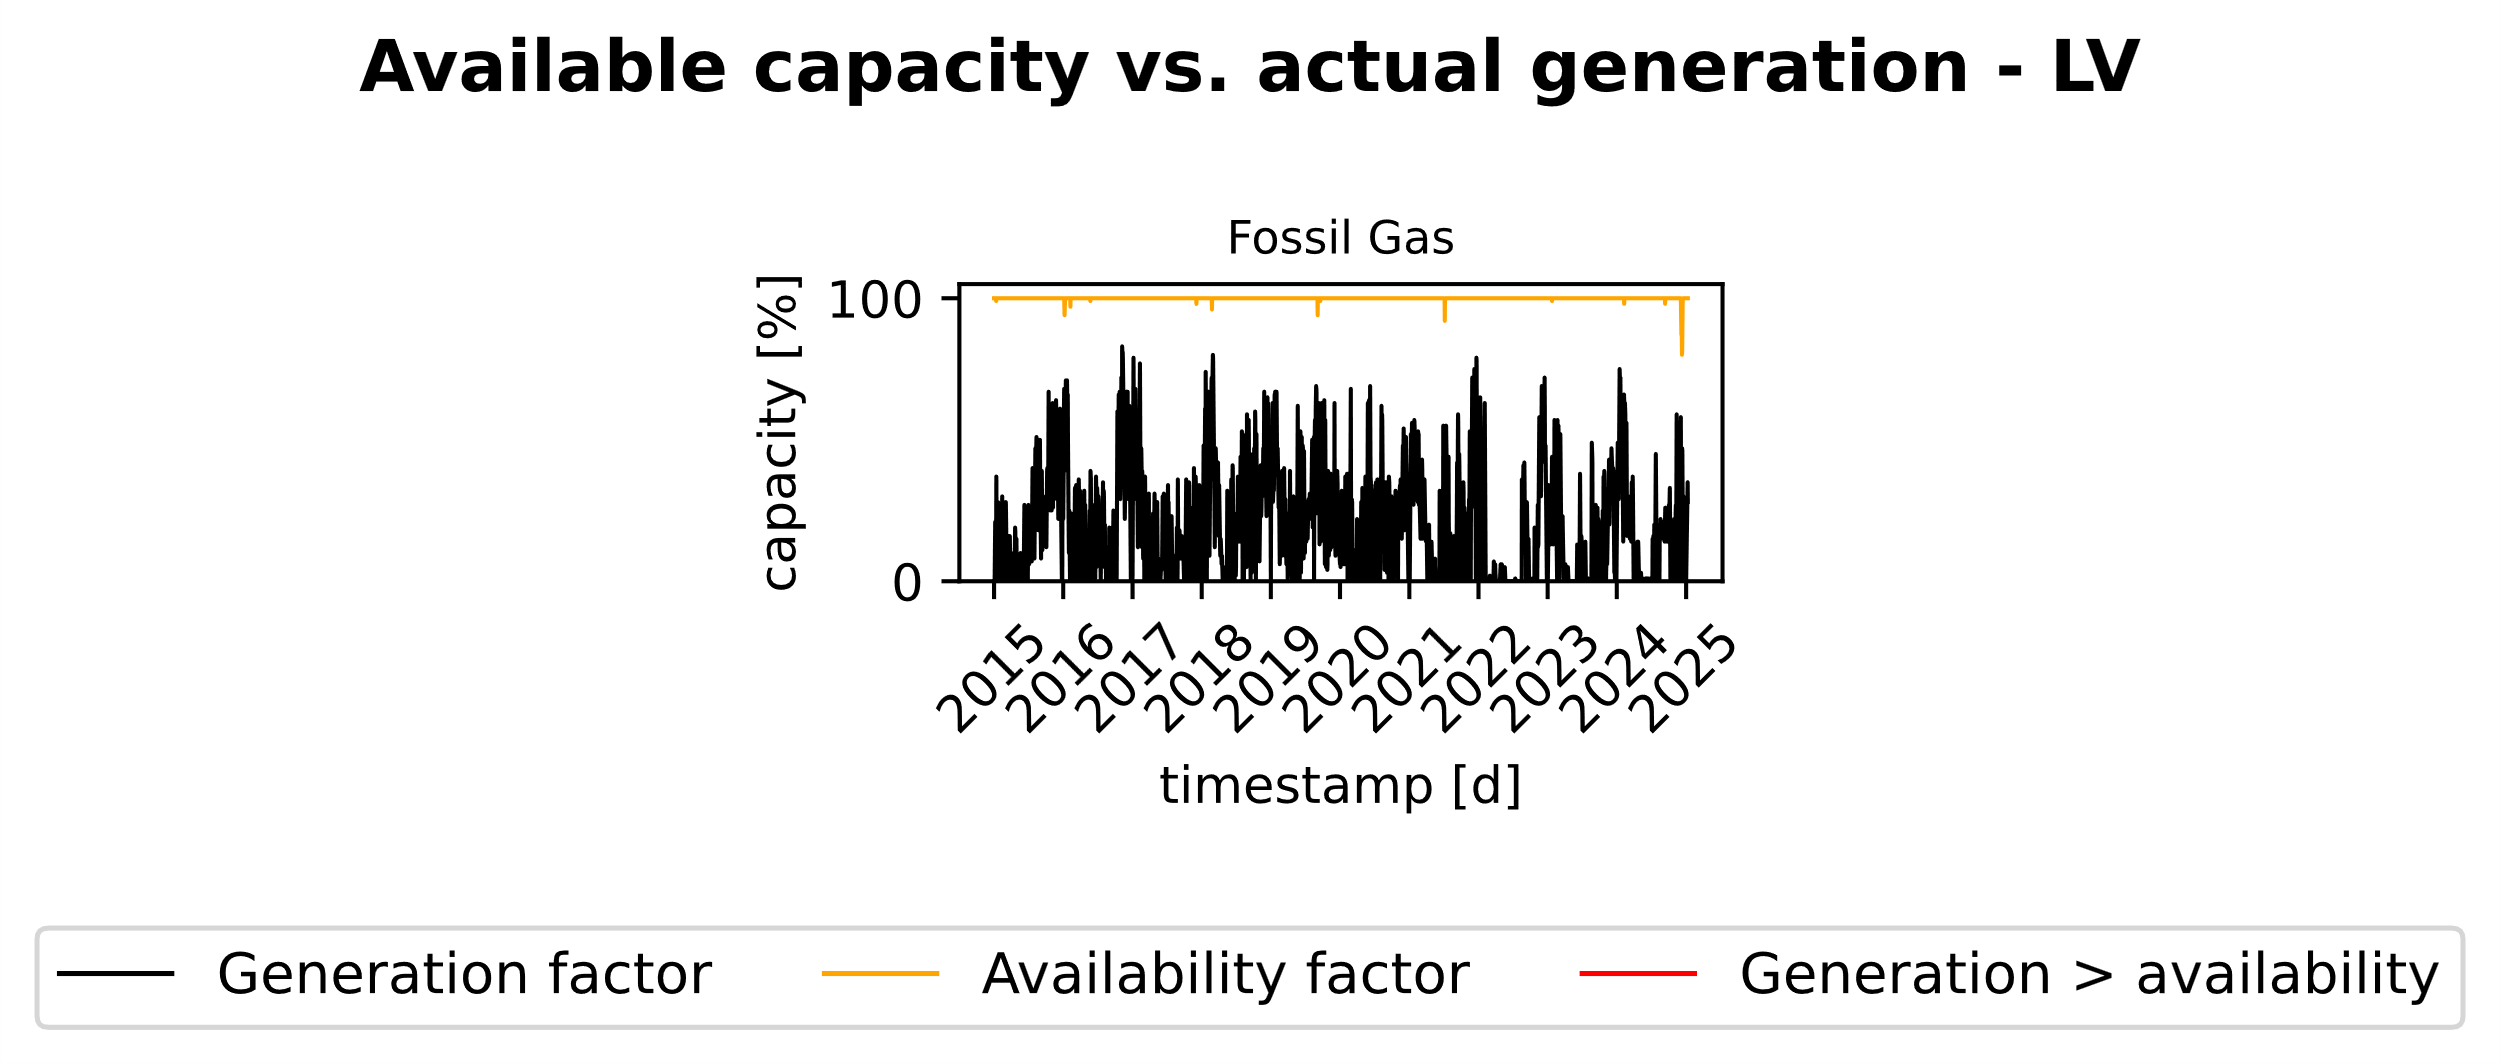


*Figure 29: Comparison of aggregated available capacity vs daily generation for Latvia*


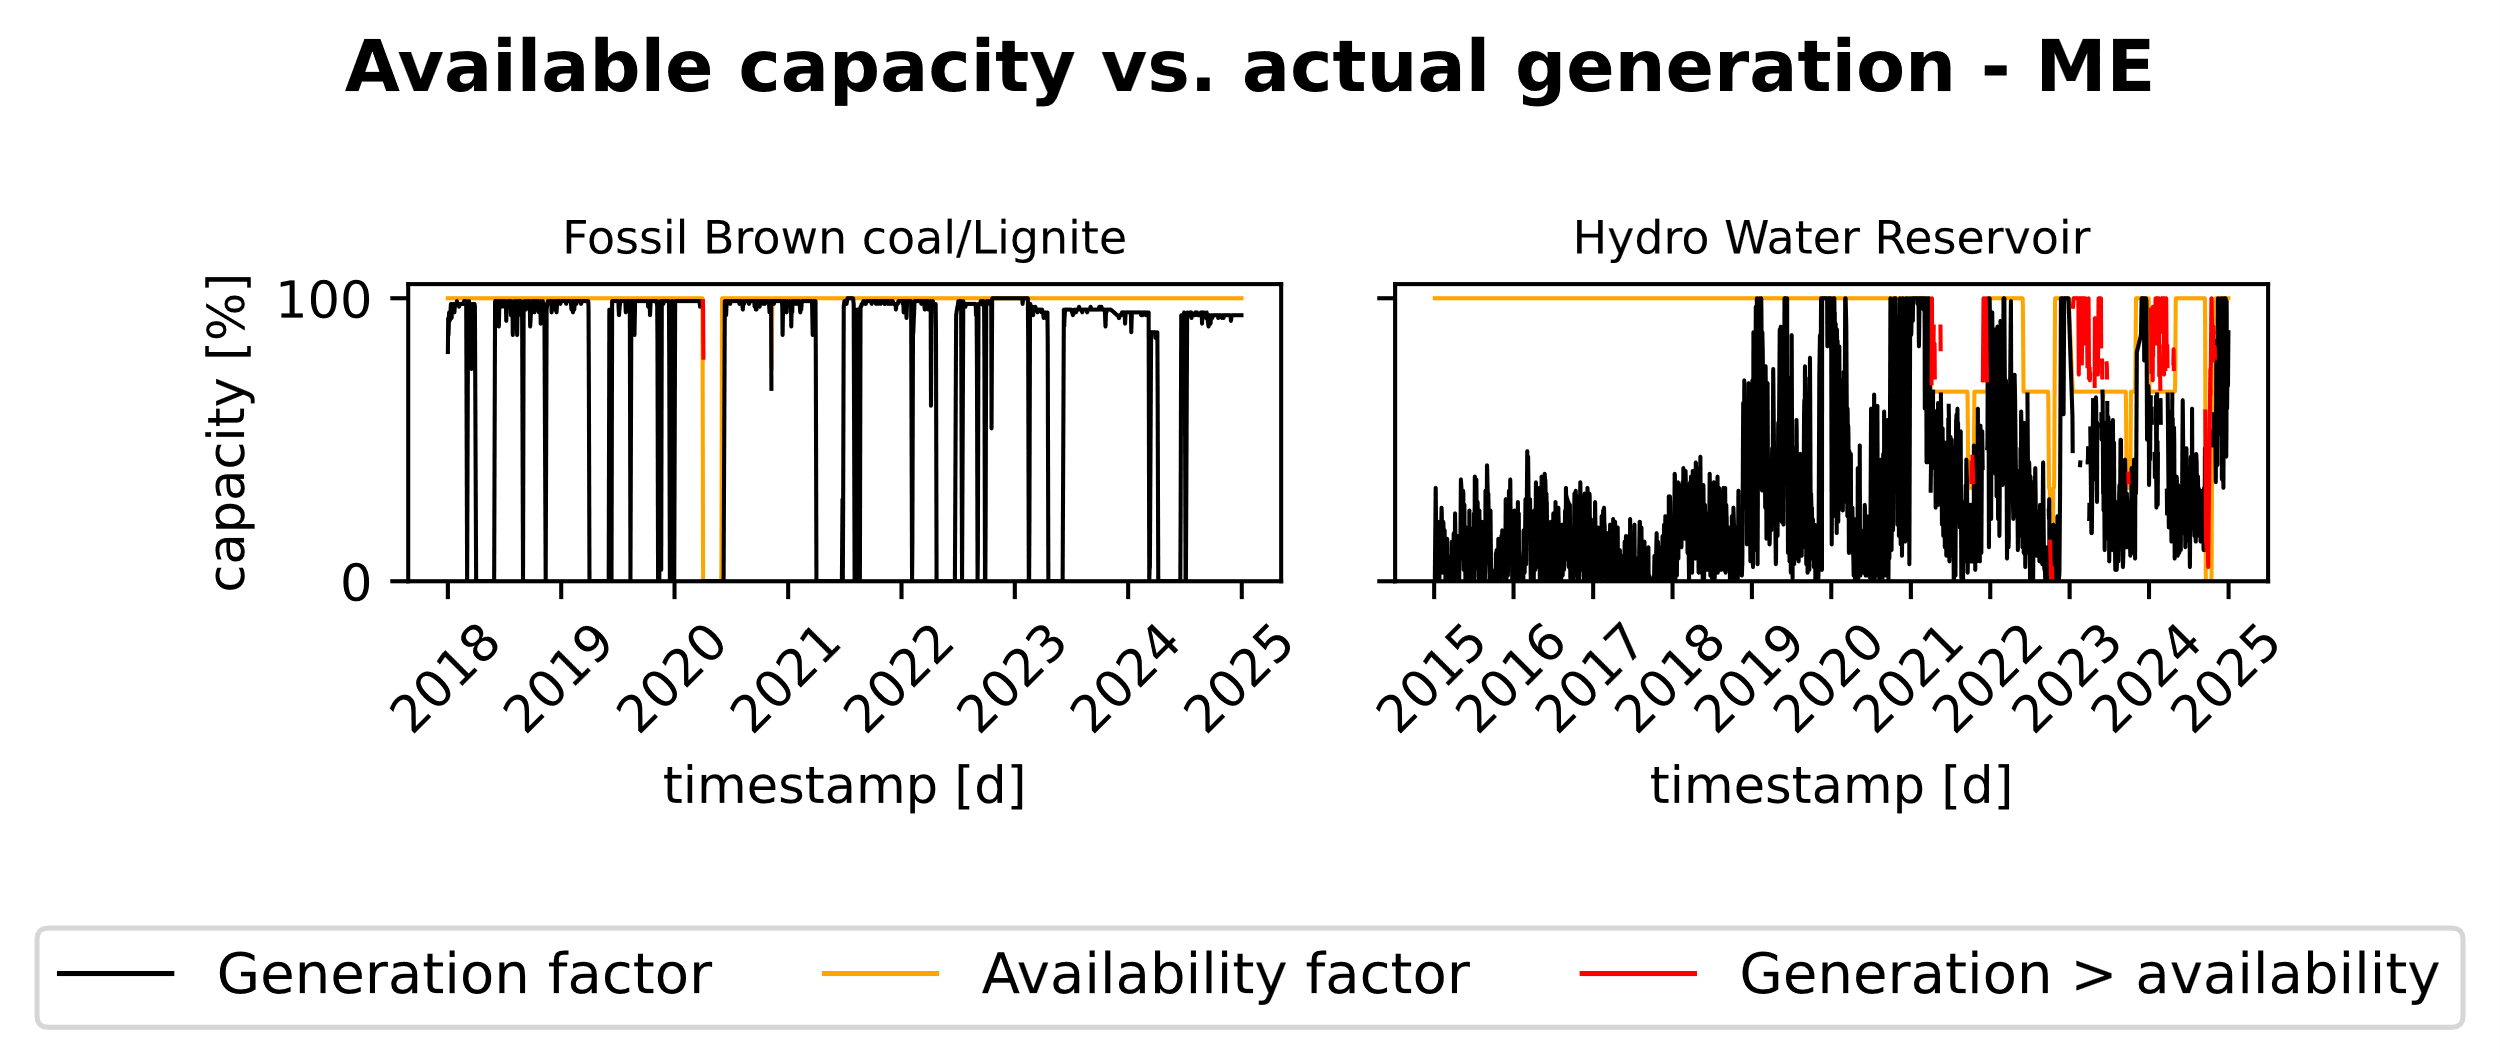


*Figure 30: Comparison of aggregated available capacity vs daily generation for Montenegro*


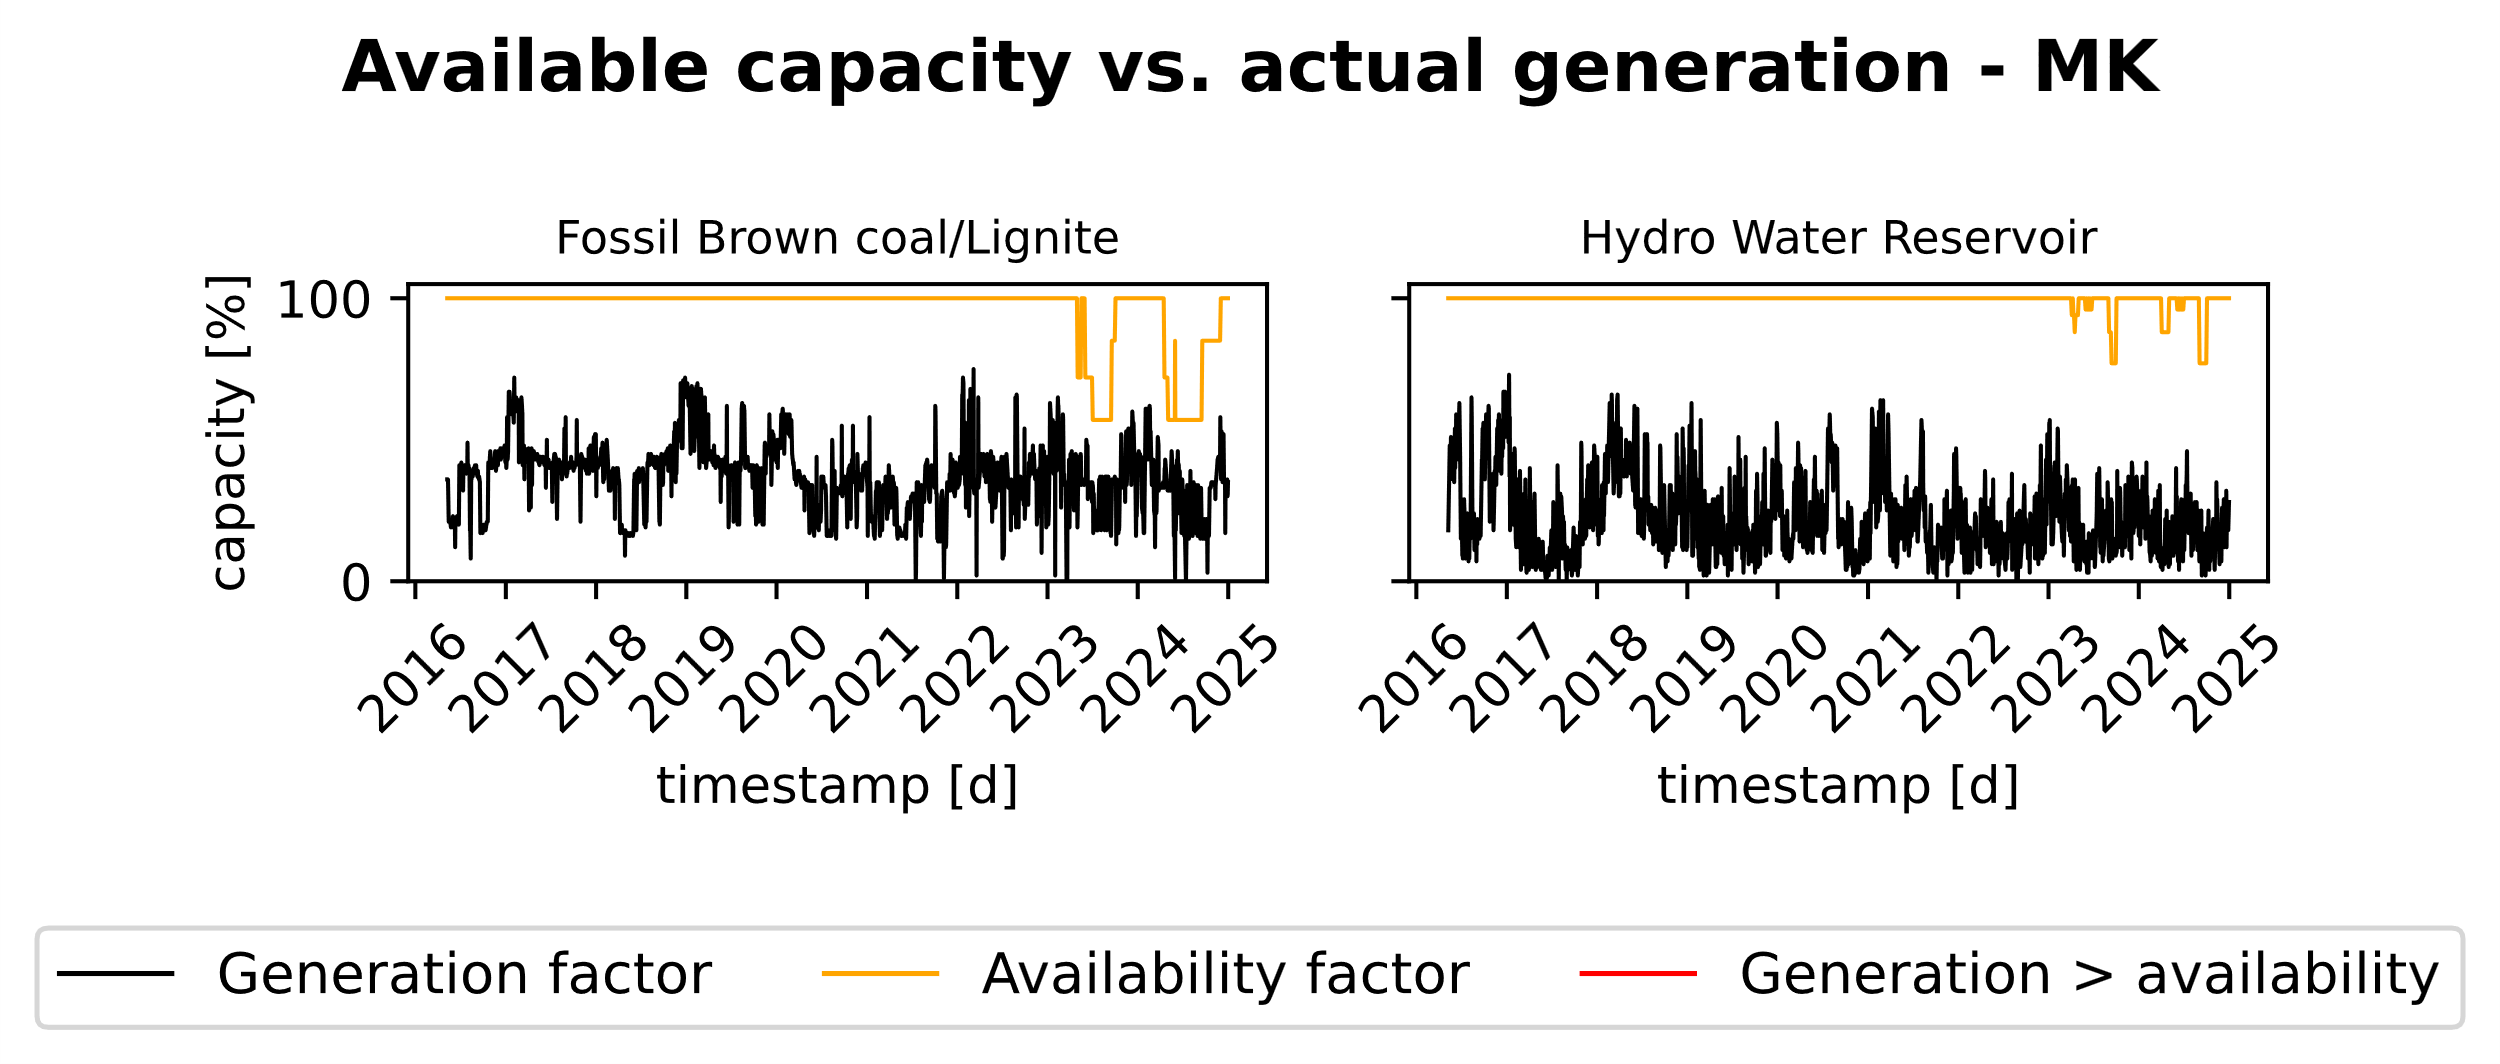


*Figure 31: Comparison of aggregated available capacity vs daily generation for North-Macedonia*


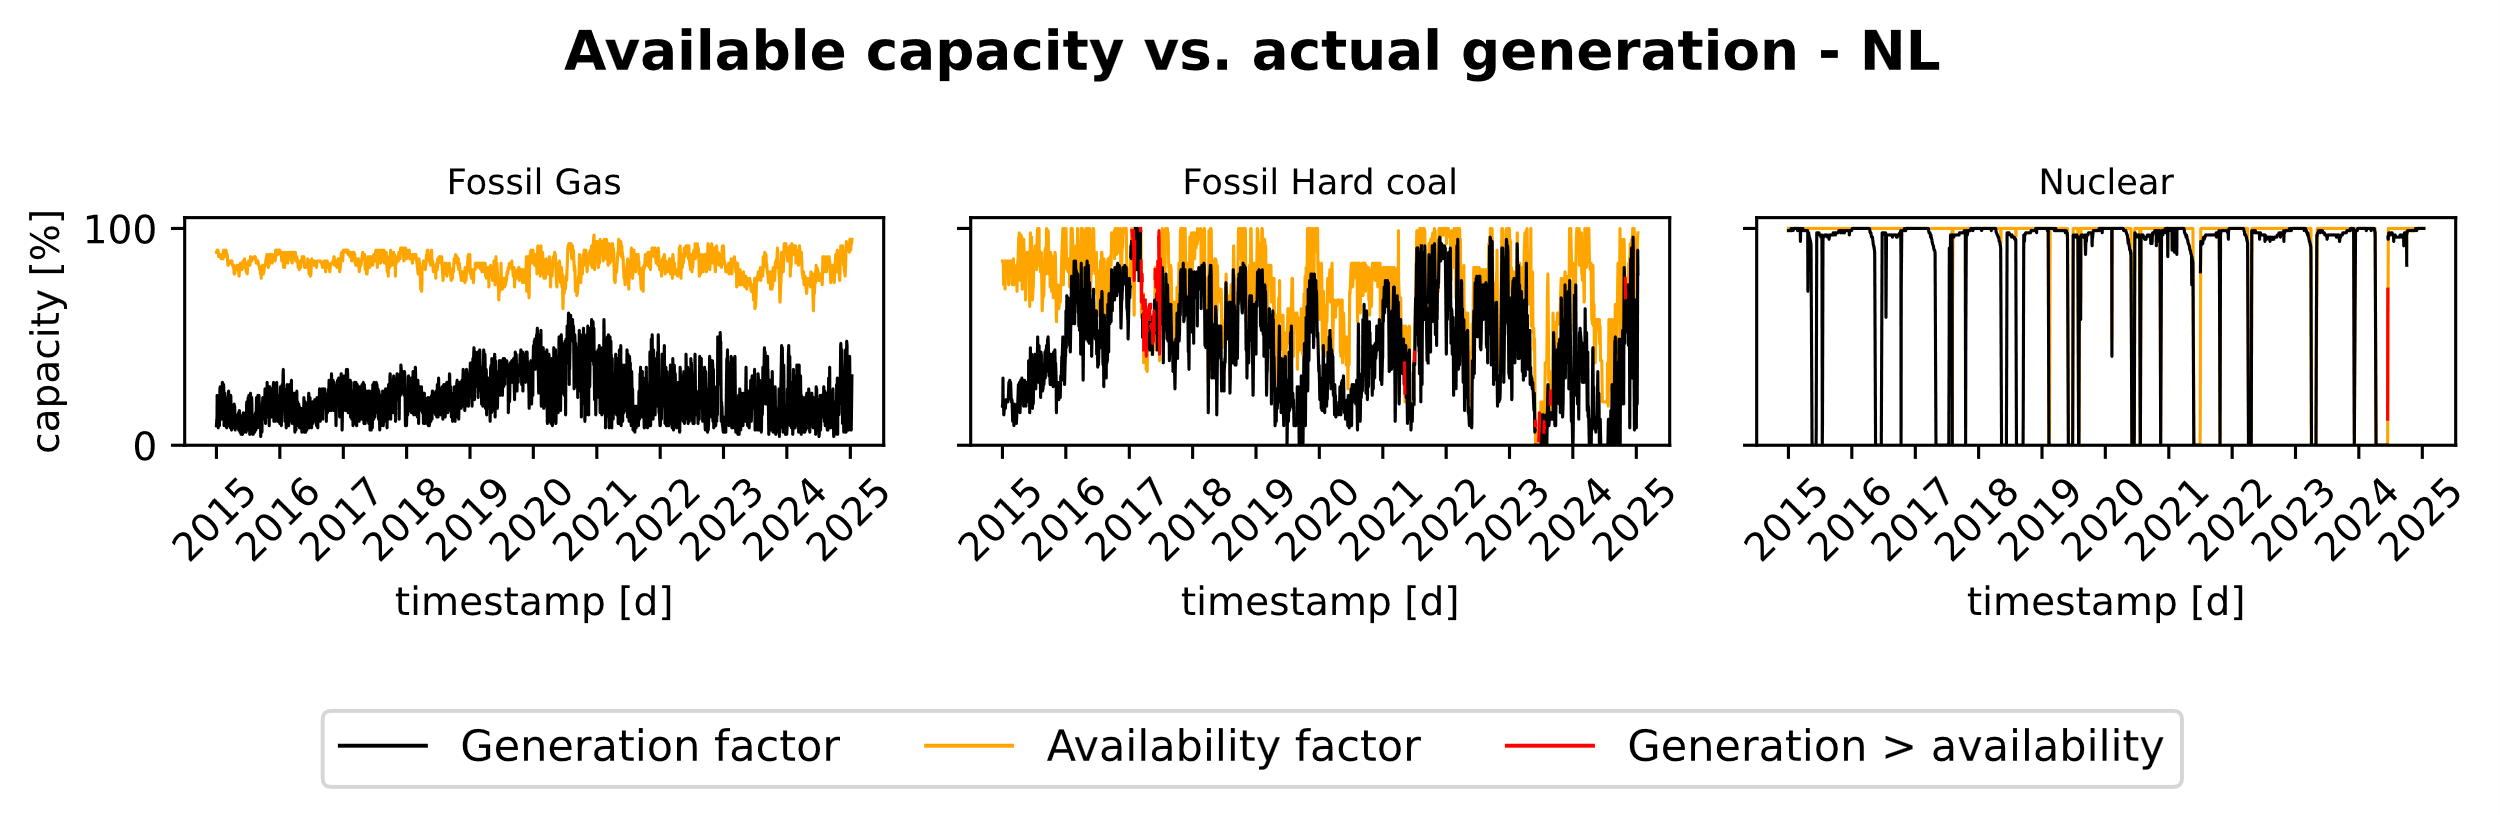


*Figure 32: Comparison of aggregated available capacity vs daily generation for The Netherlands*


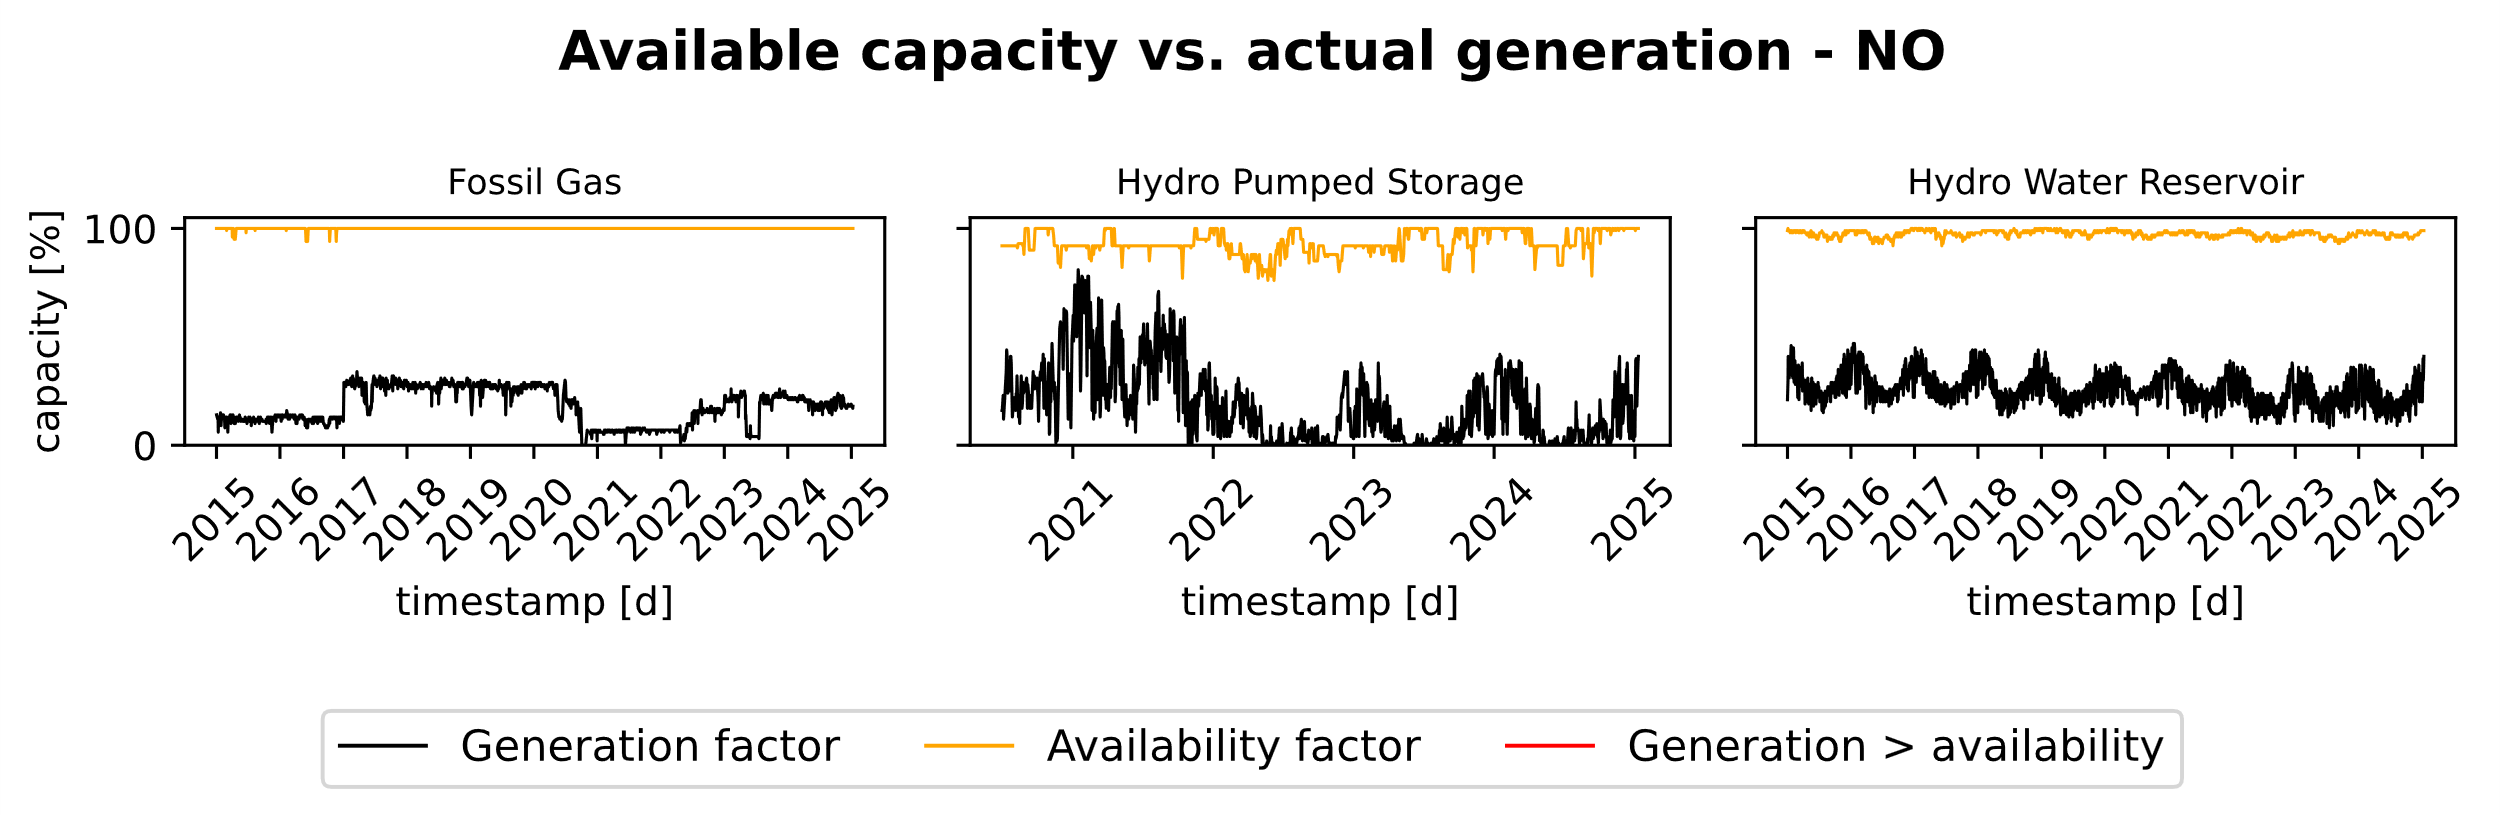


*Figure 33: Comparison of aggregated available capacity vs daily generation for Norway*


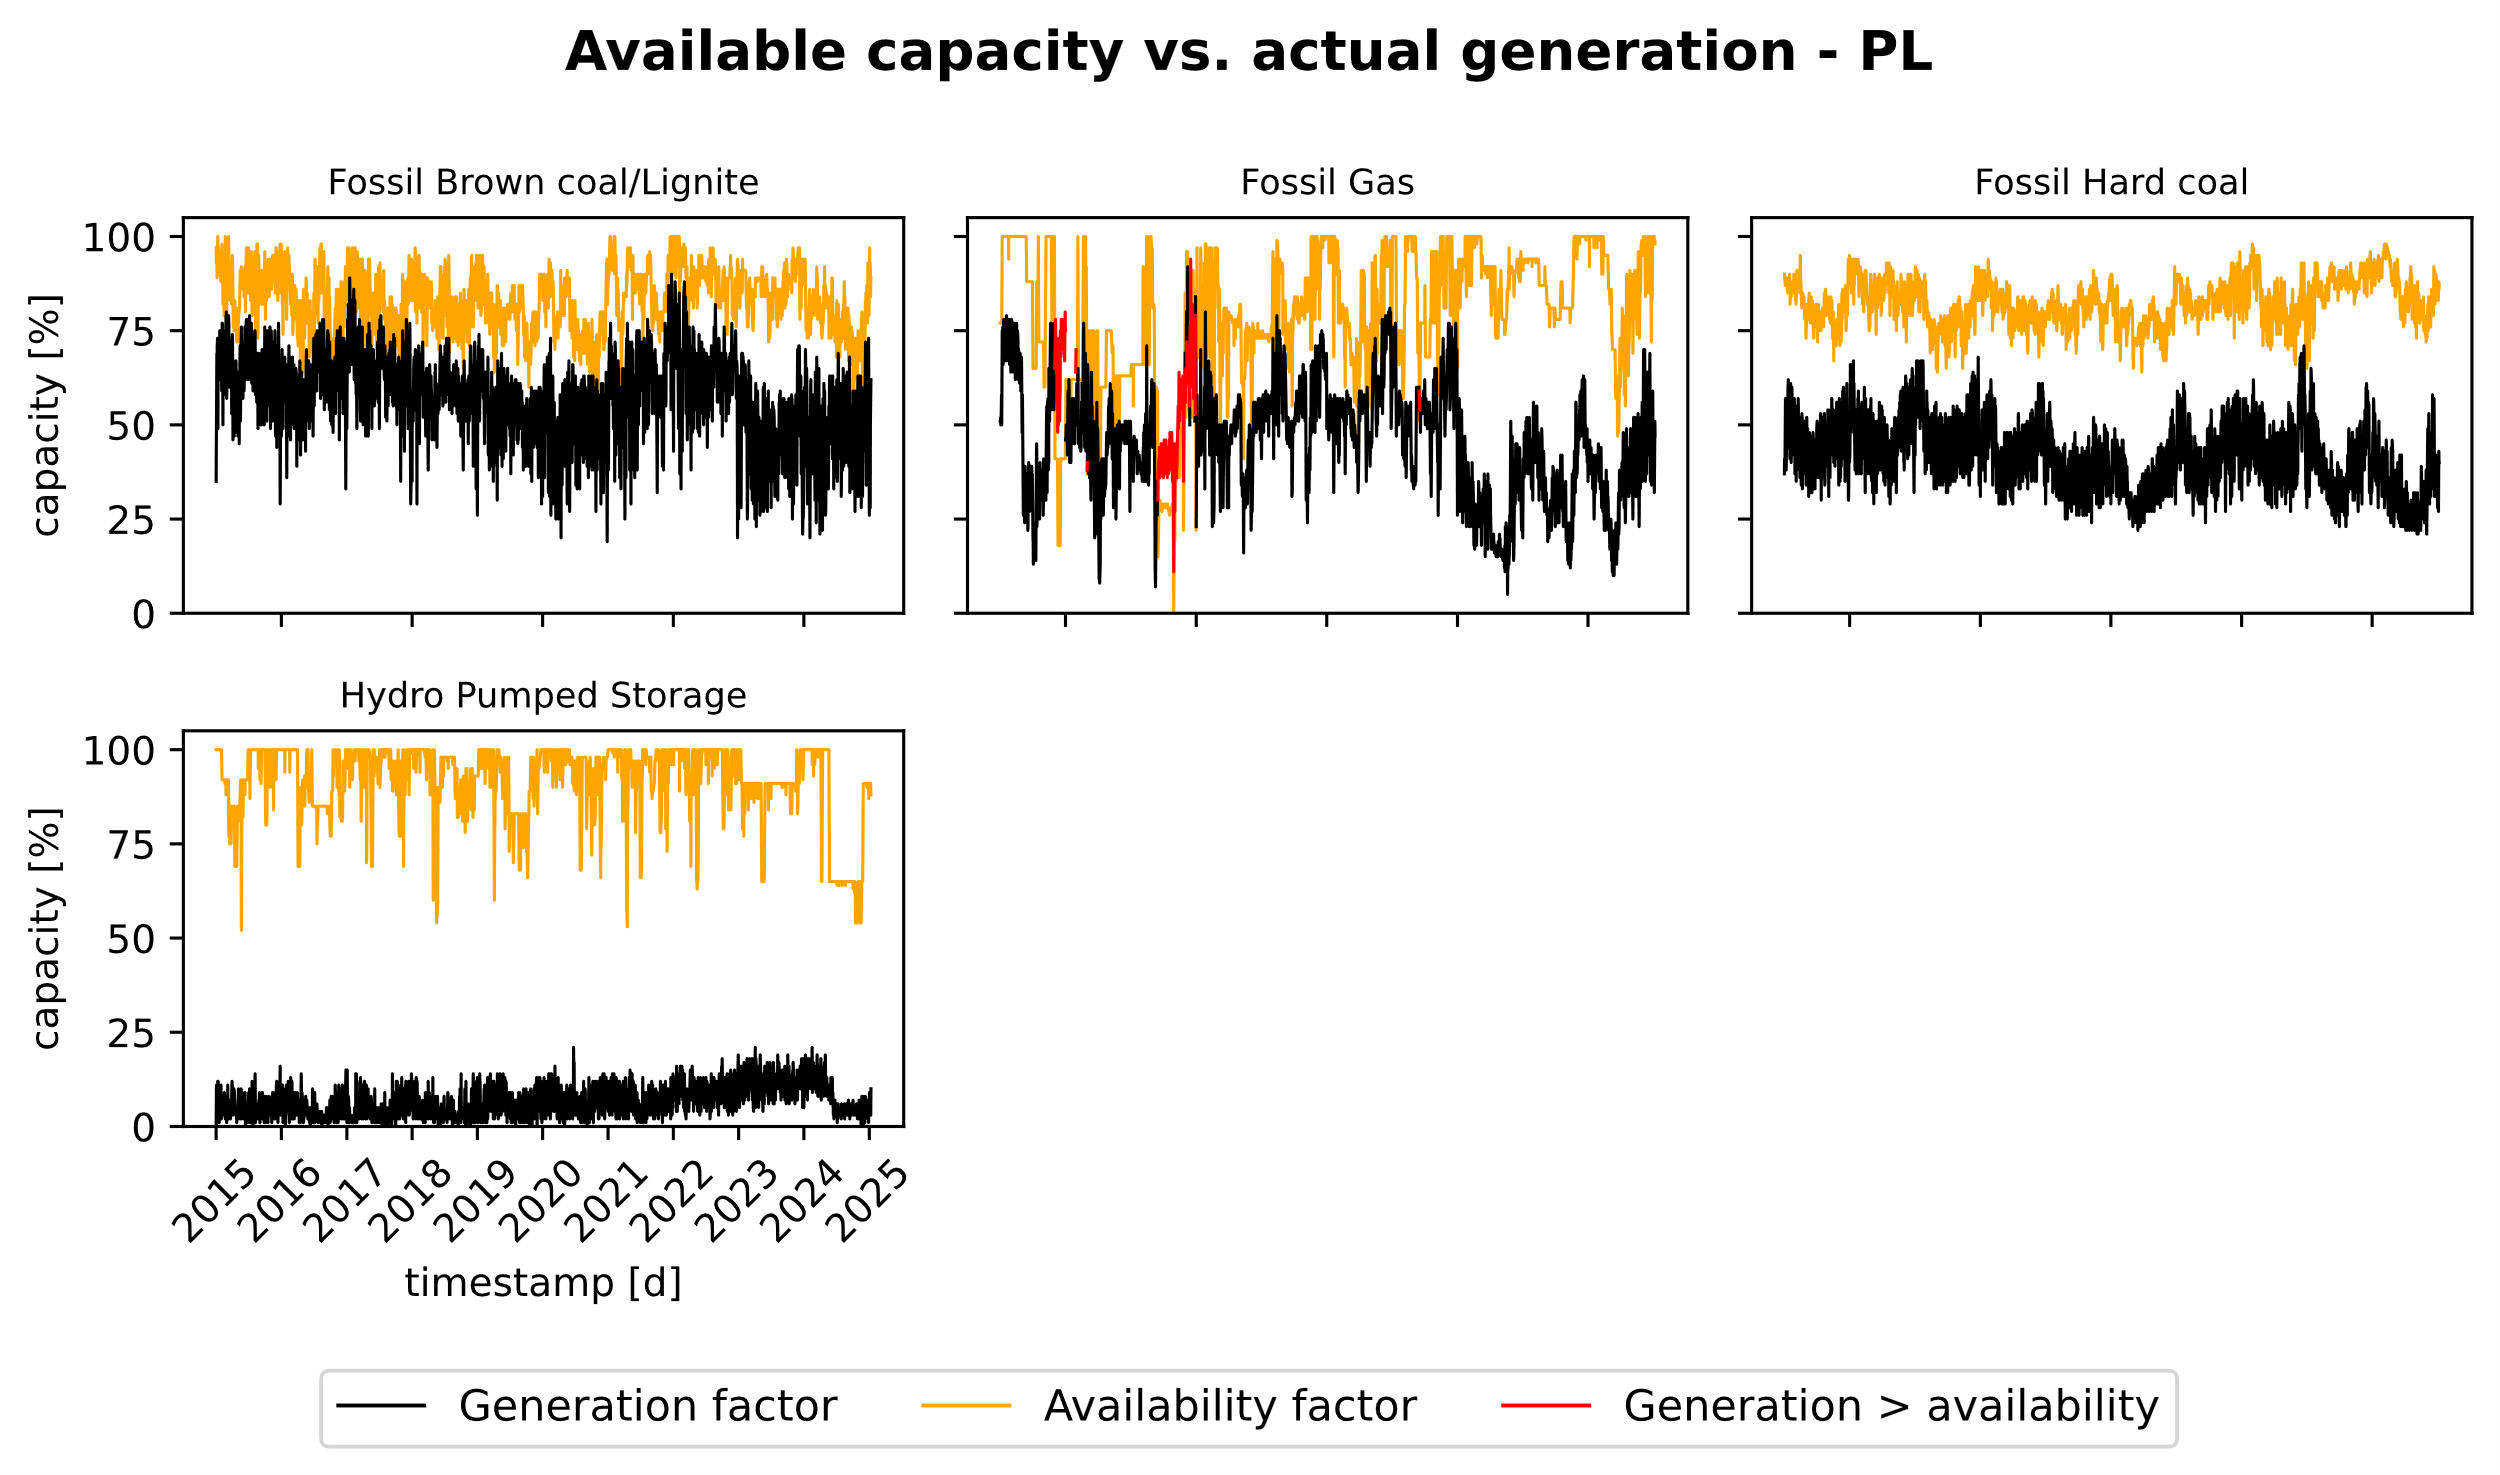


*Figure 34: Comparison of aggregated available capacity vs daily generation for Poland*


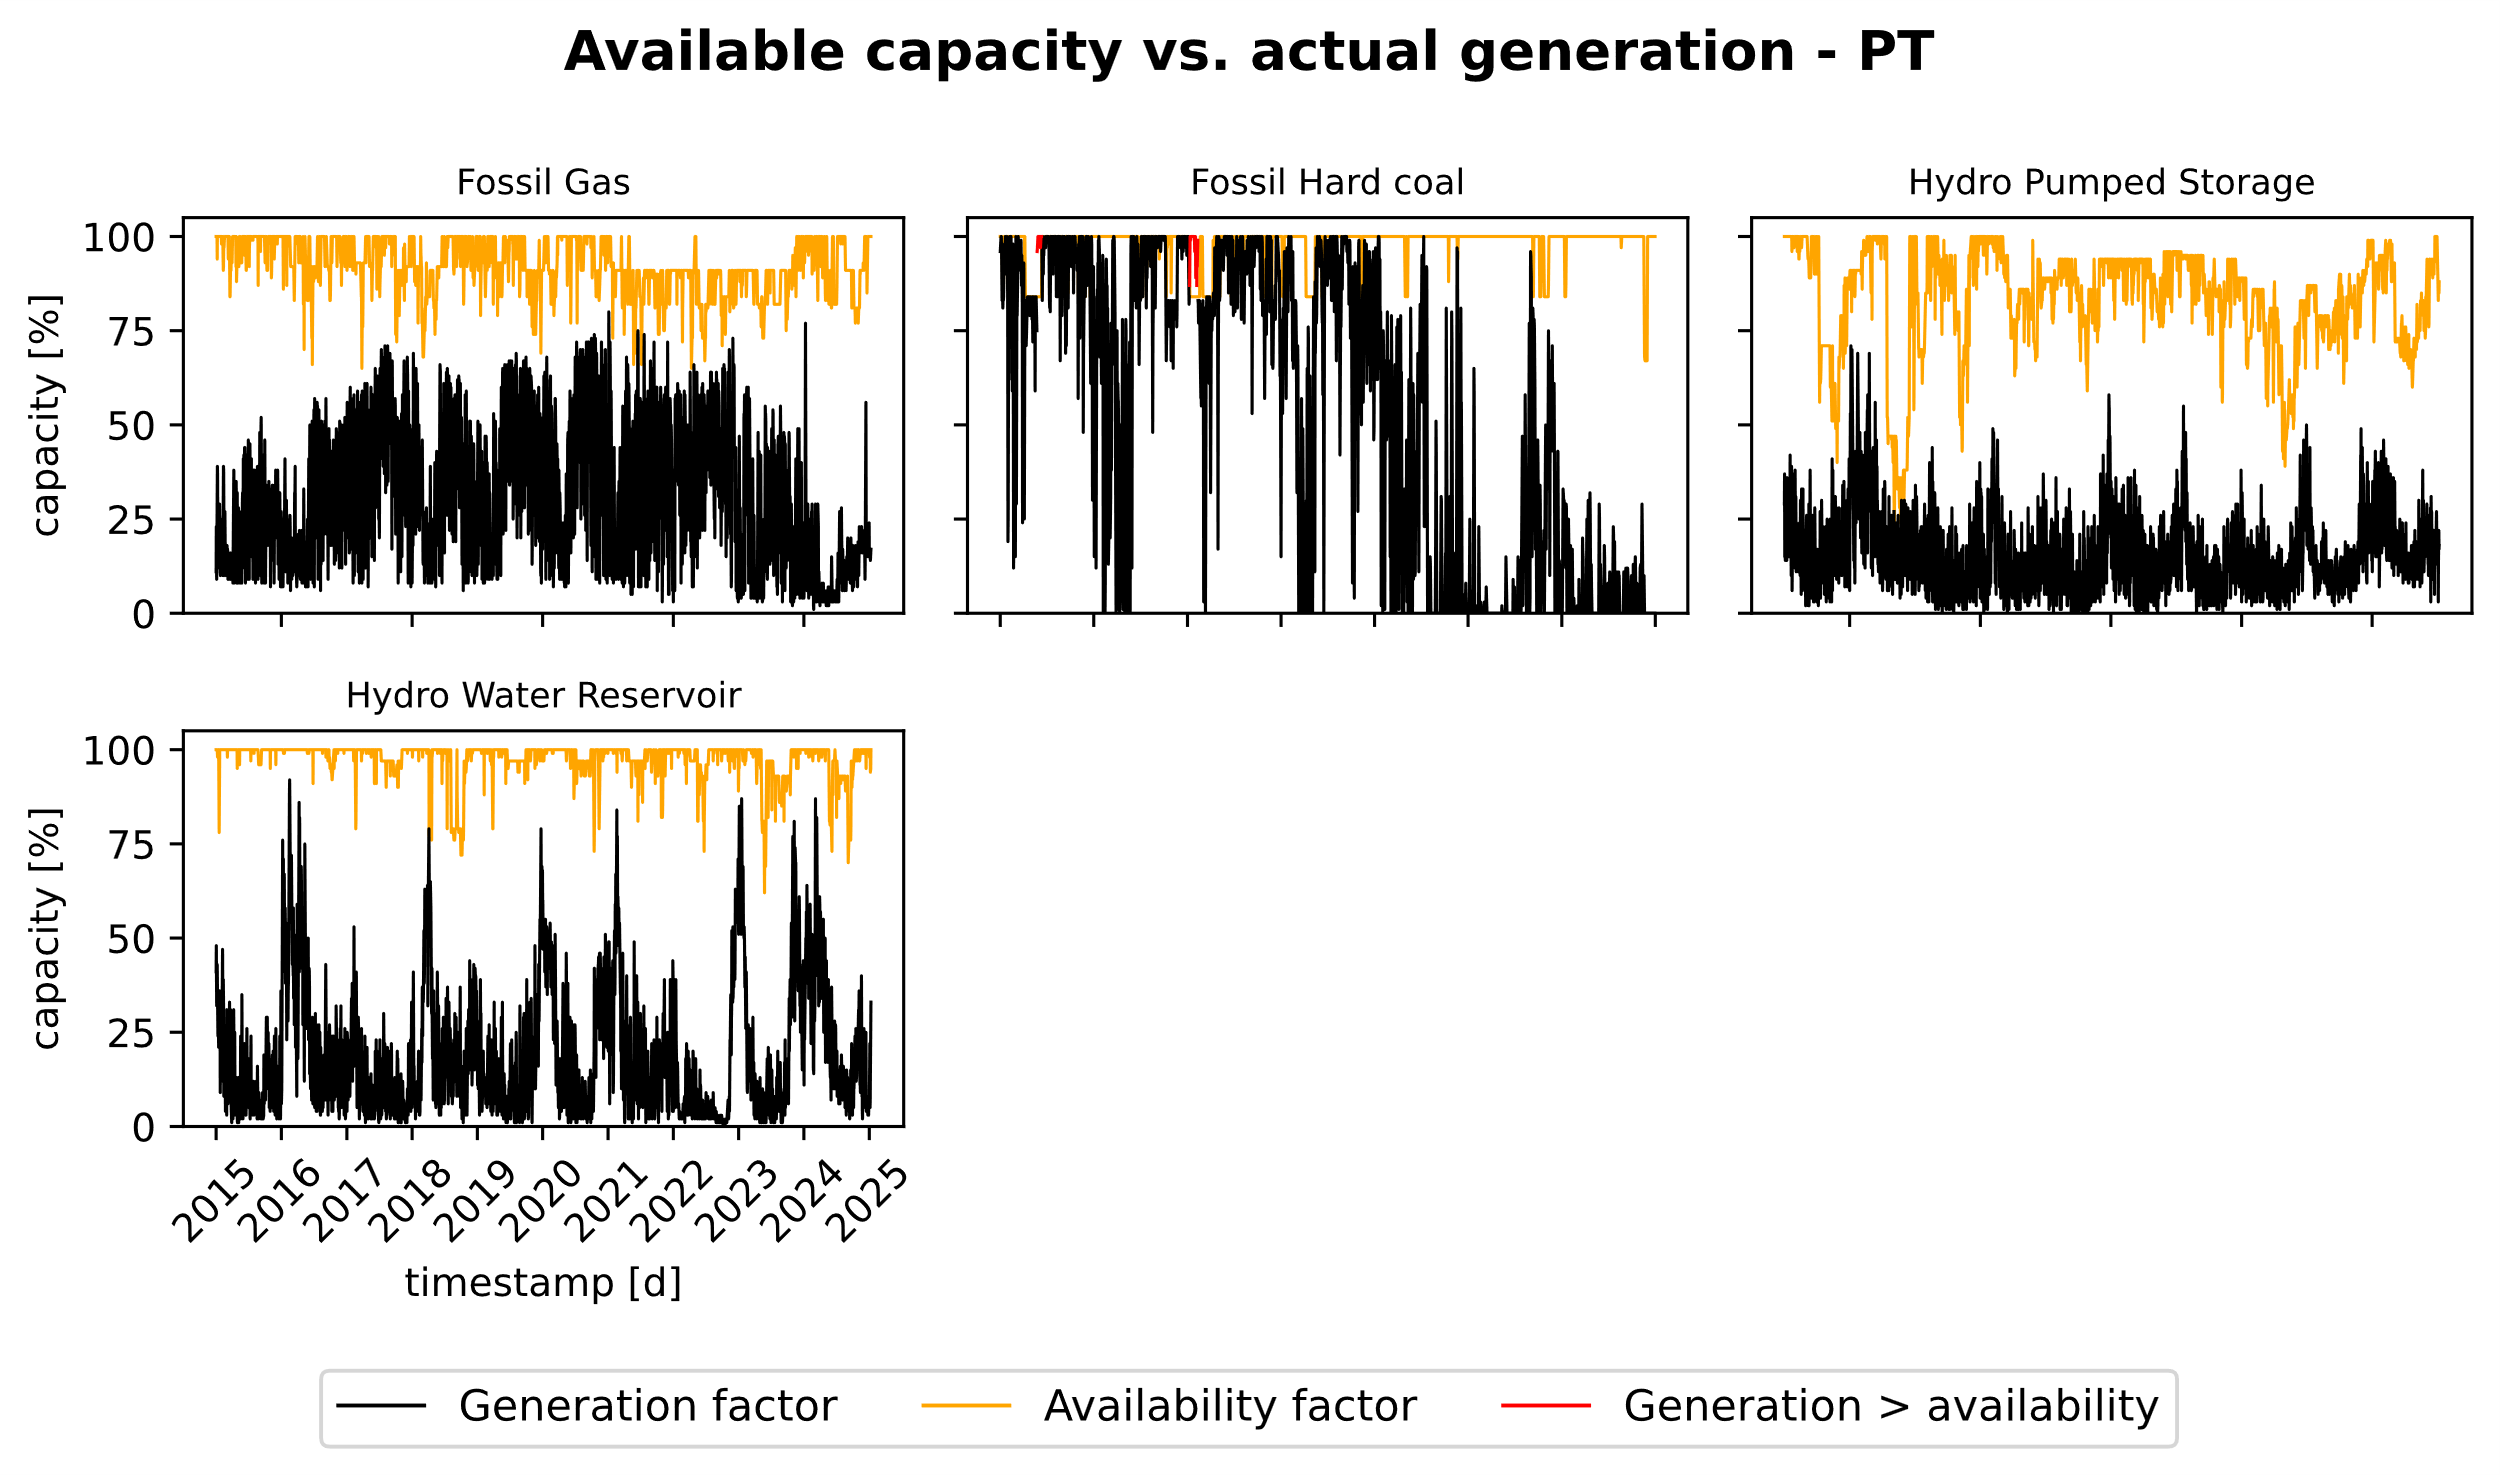


*Figure 35: Comparison of aggregated available capacity vs daily generation for Portugal*


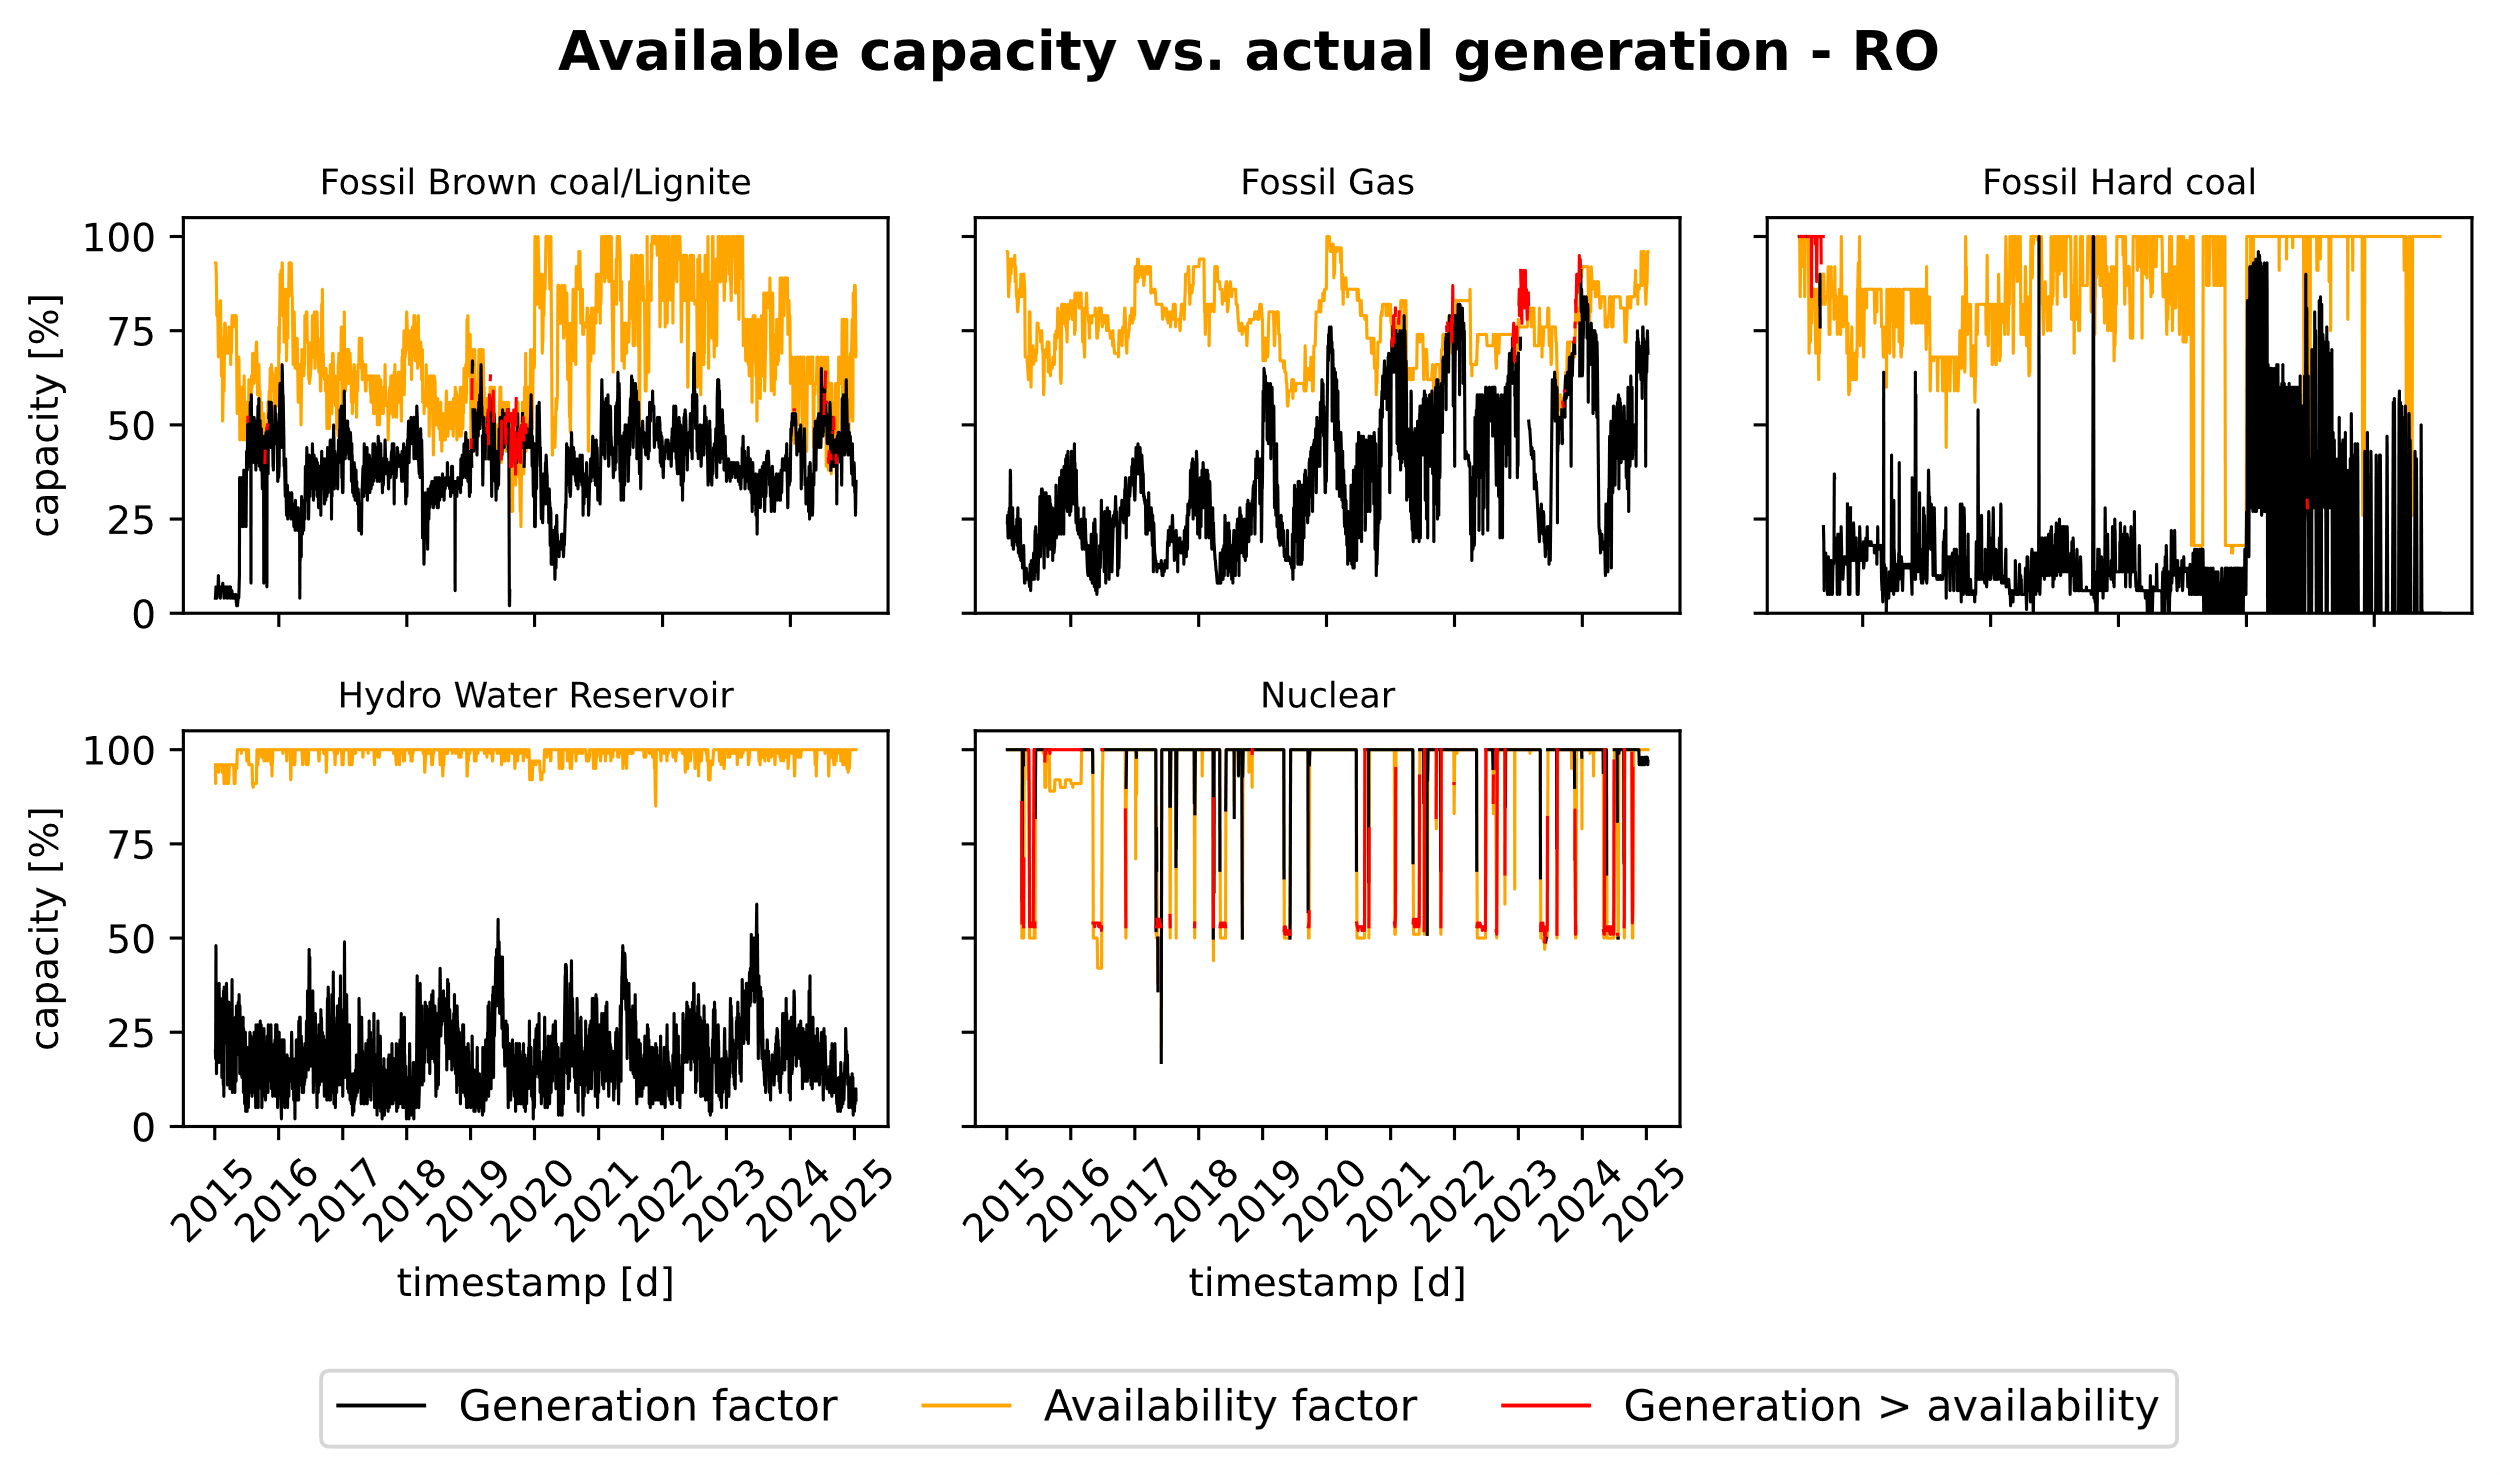


*Figure 36: Comparison of aggregated available capacity vs daily generation for Romania*


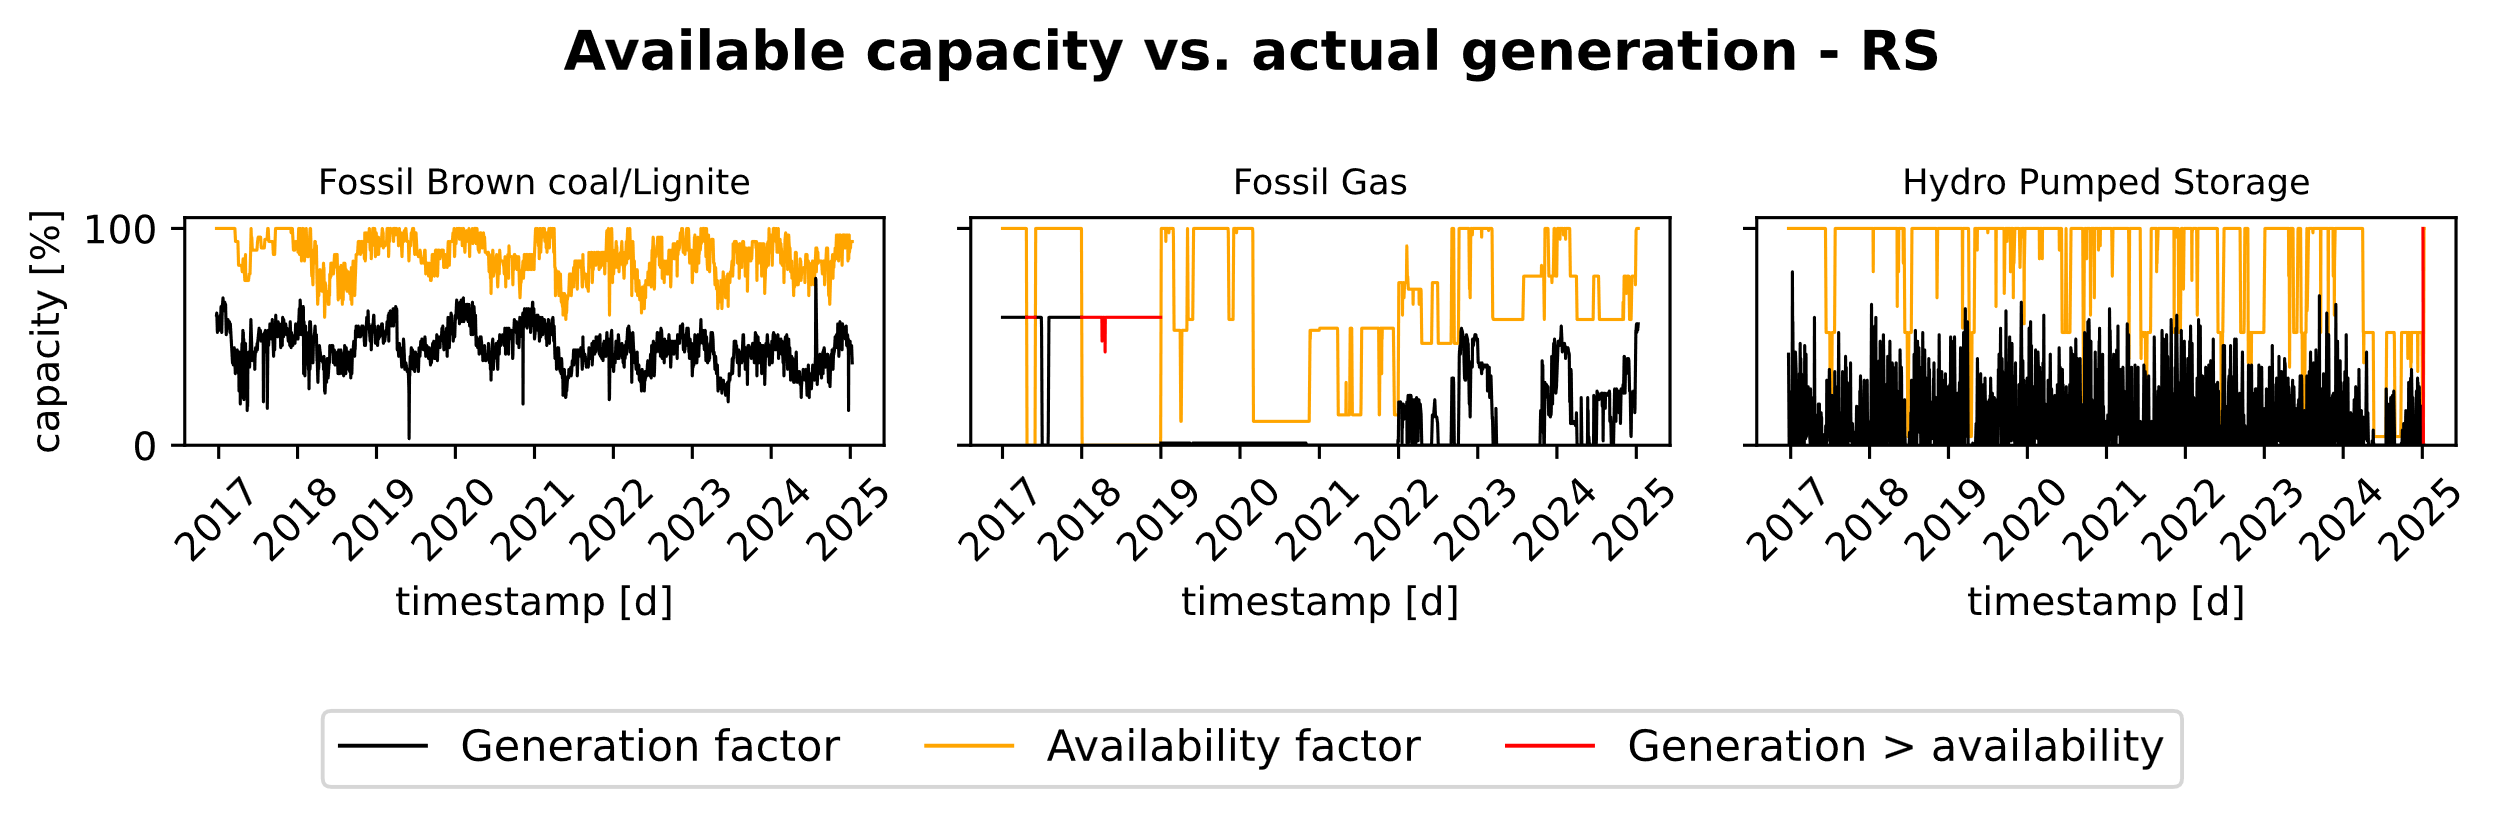


*Figure 37: Comparison of aggregated available capacity vs daily generation for Serbia*


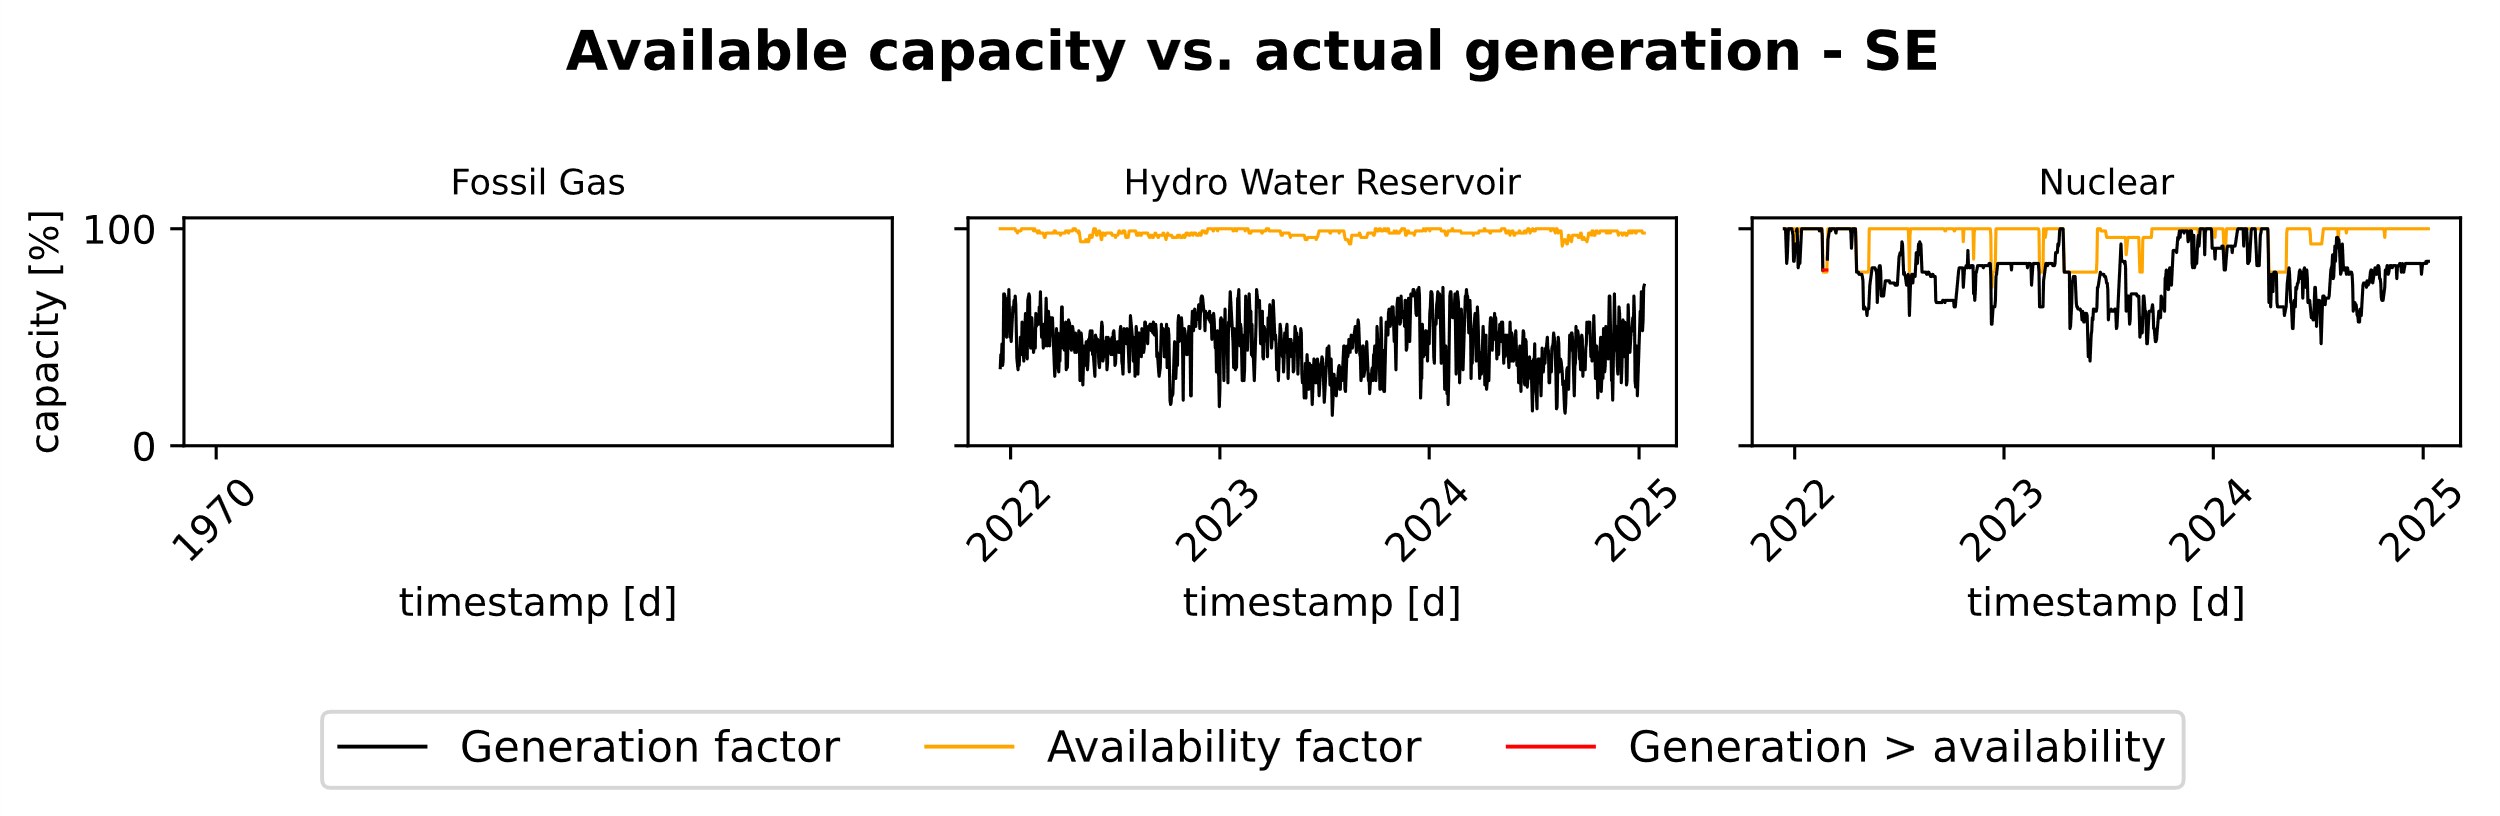


*Figure 38: Comparison of aggregated available capacity vs daily generation for Sweden*


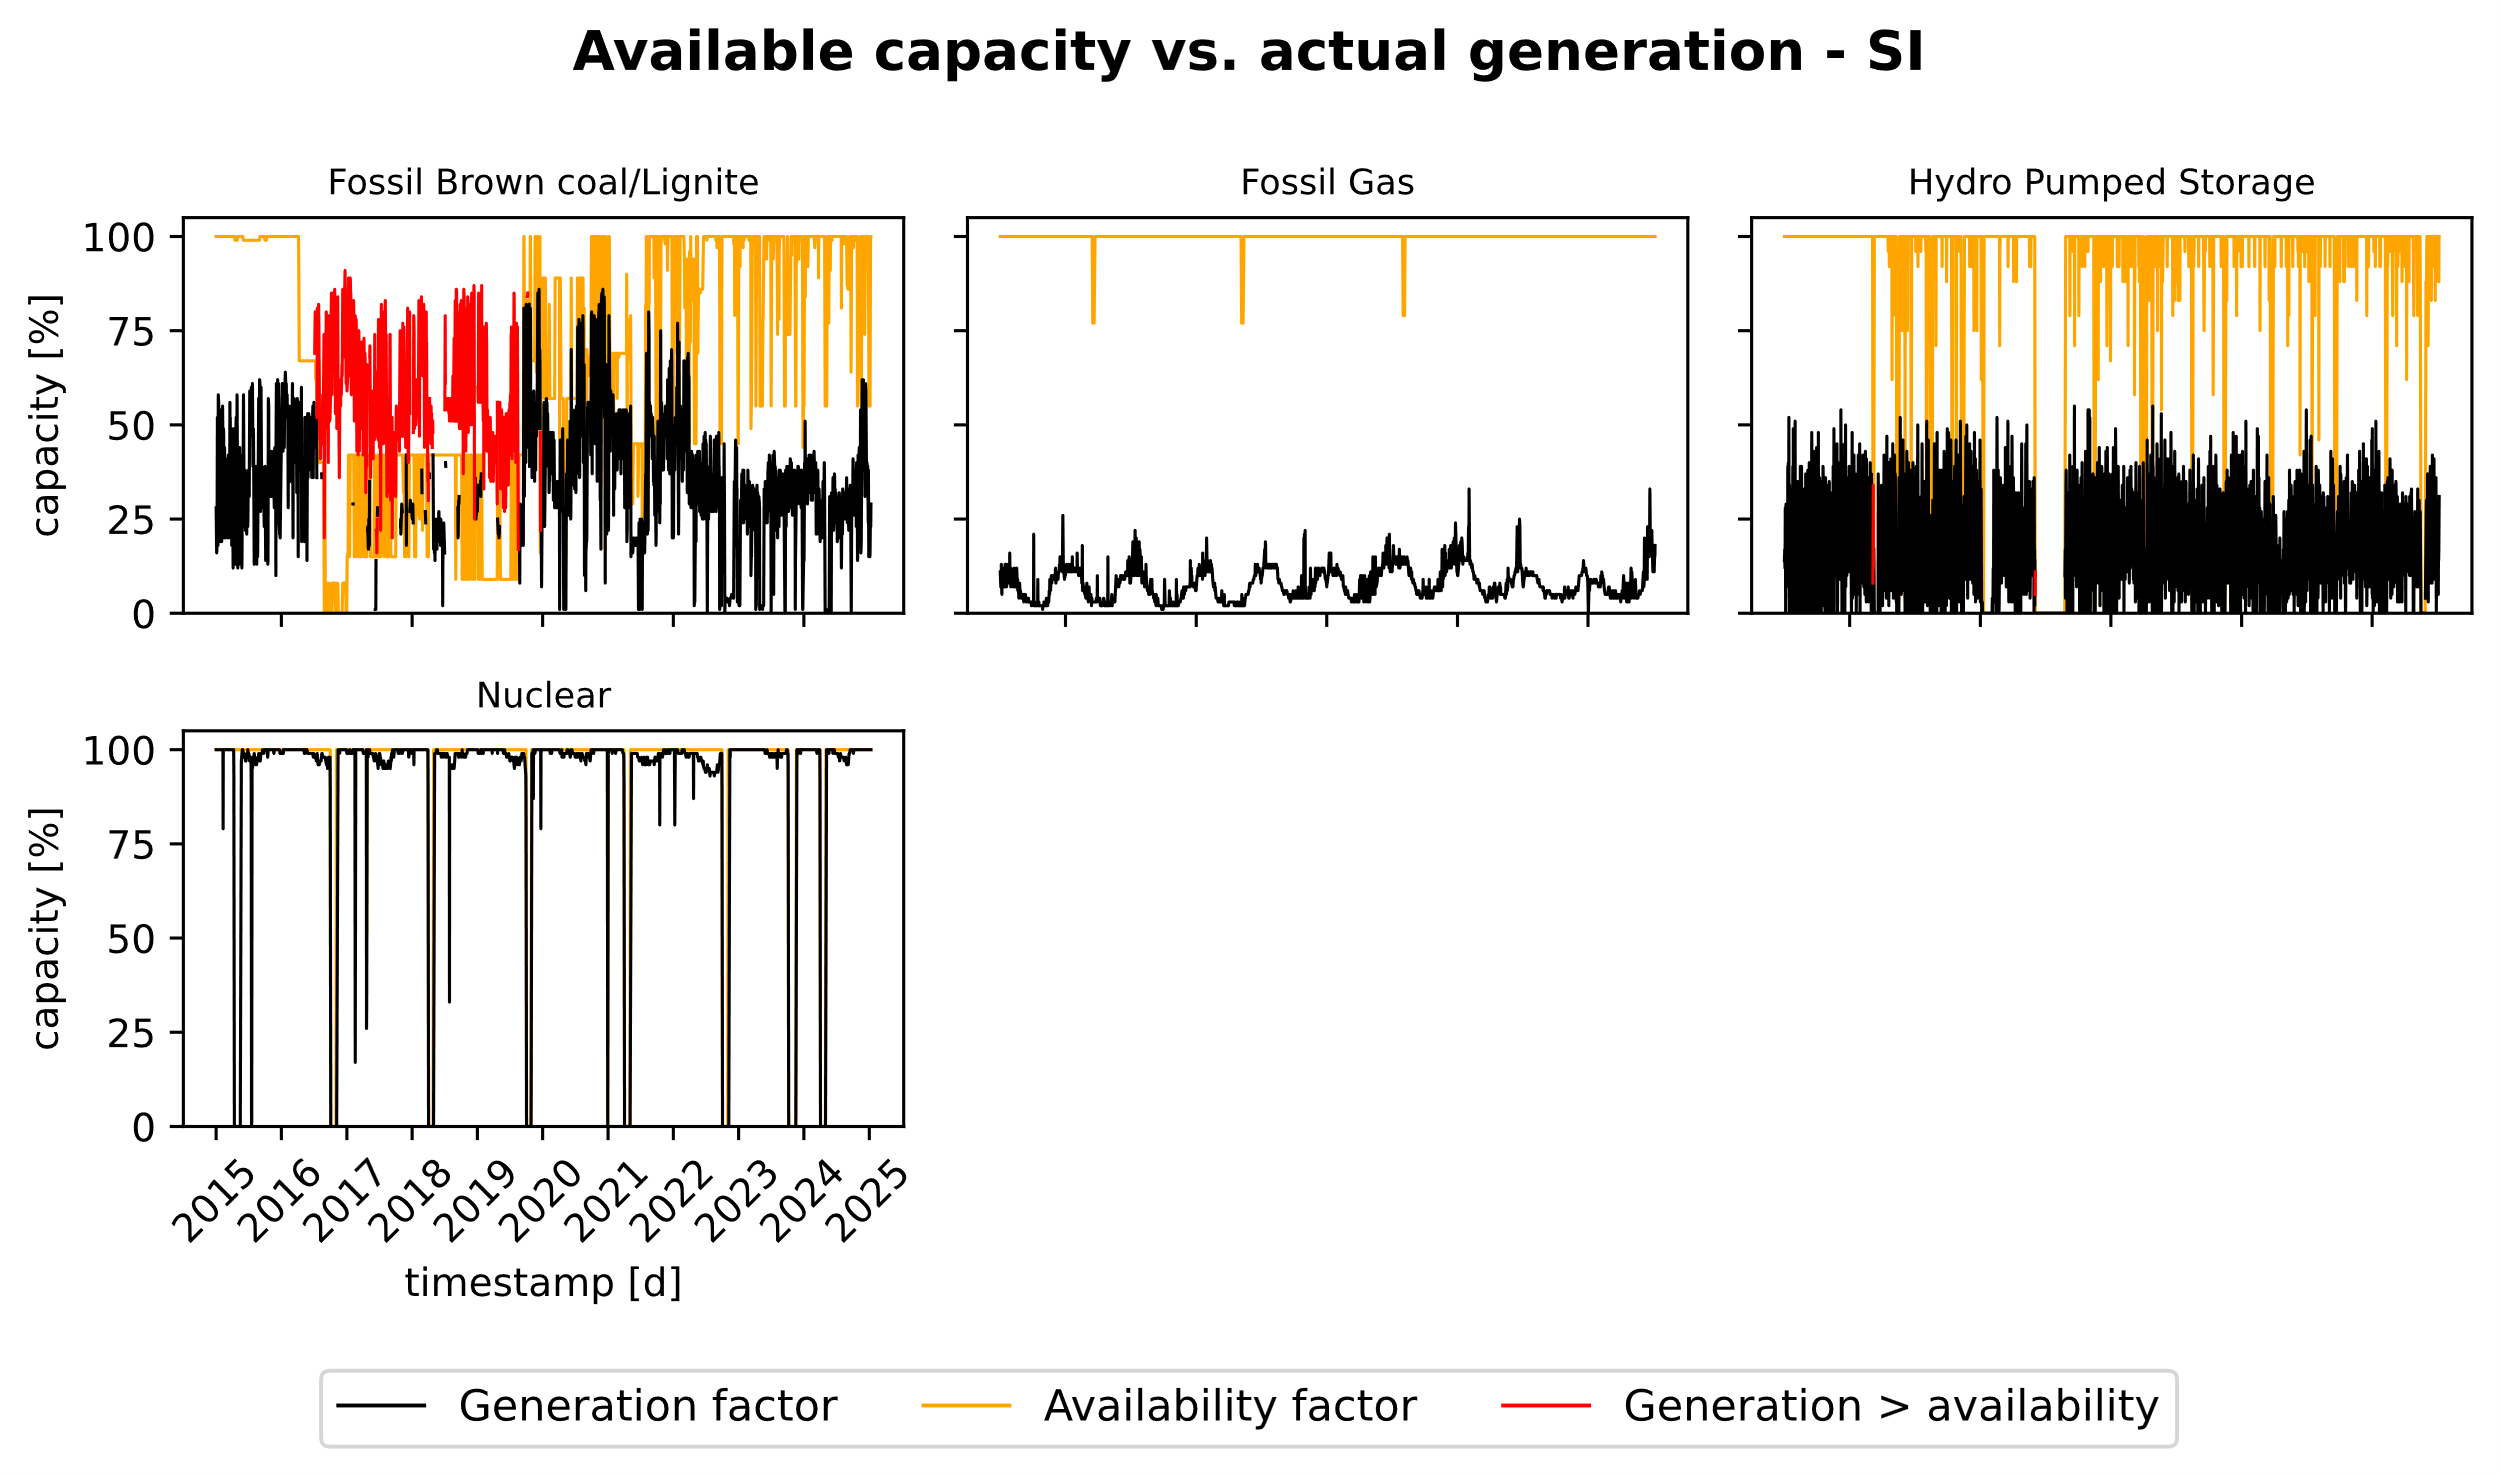


*Figure 39: Comparison of aggregated available capacity vs daily generation for Slovenia*


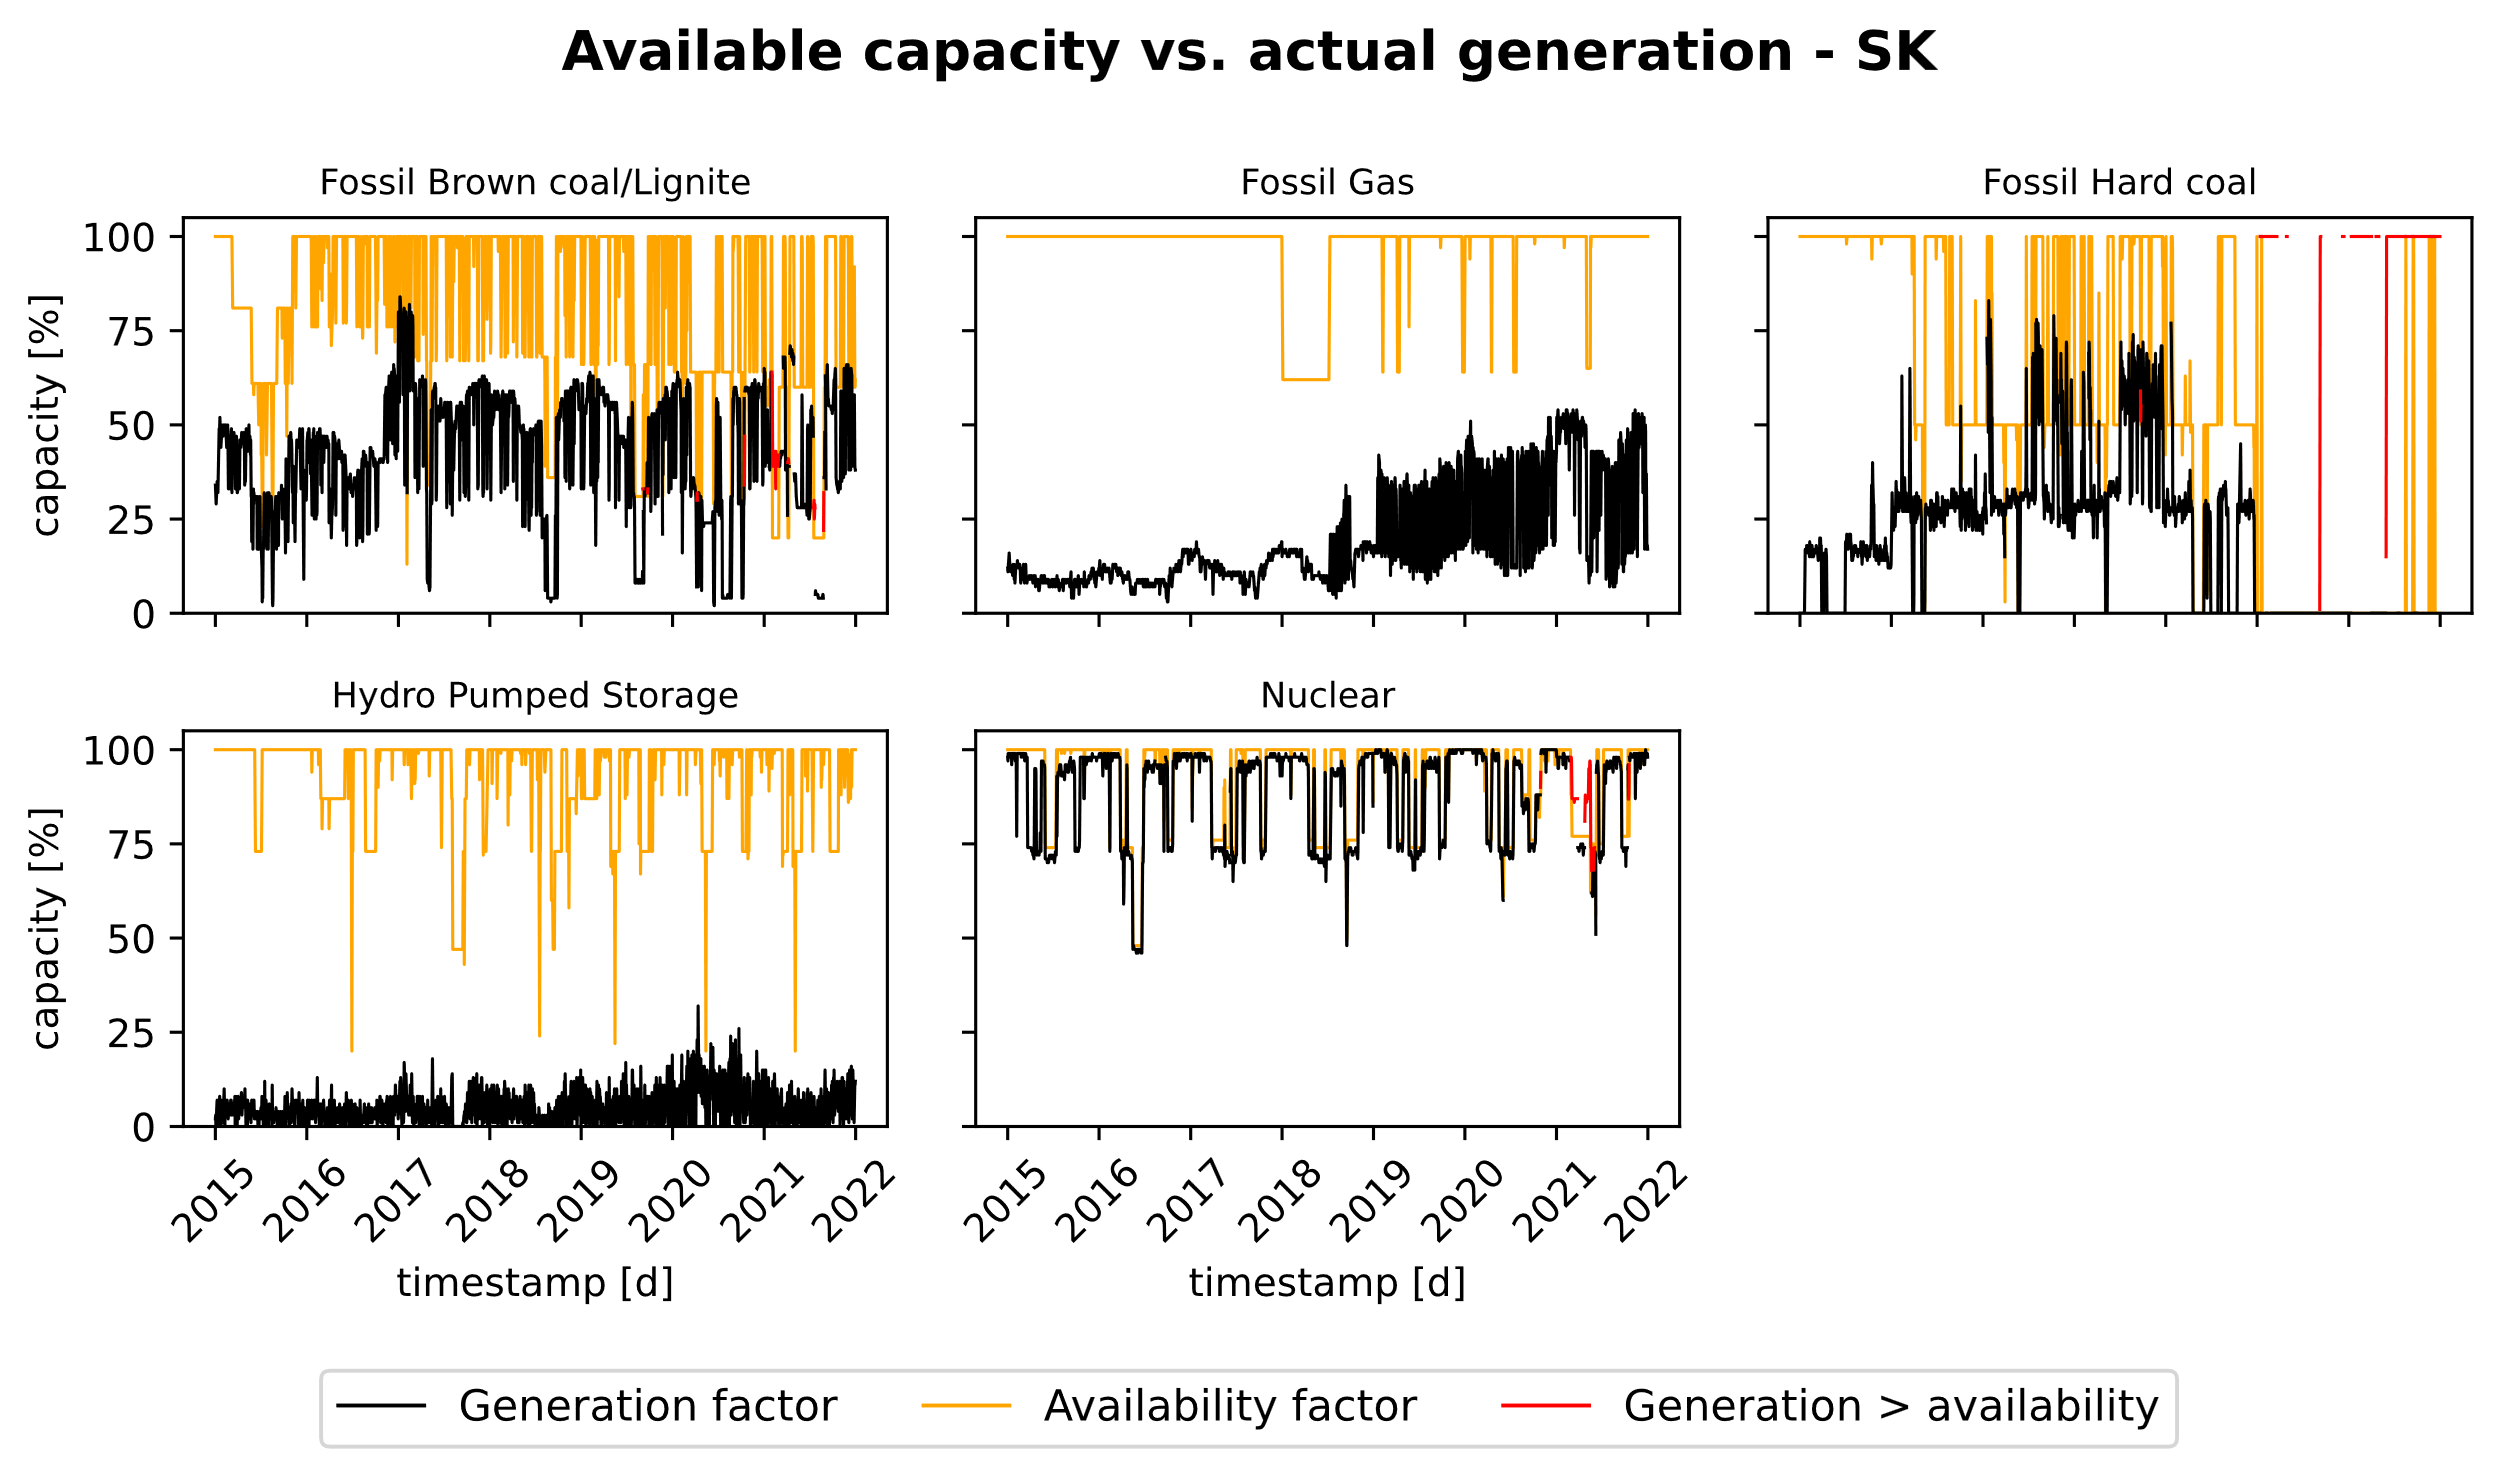


*Figure 40: Comparison of aggregated available capacity vs daily generation for Slovakia*


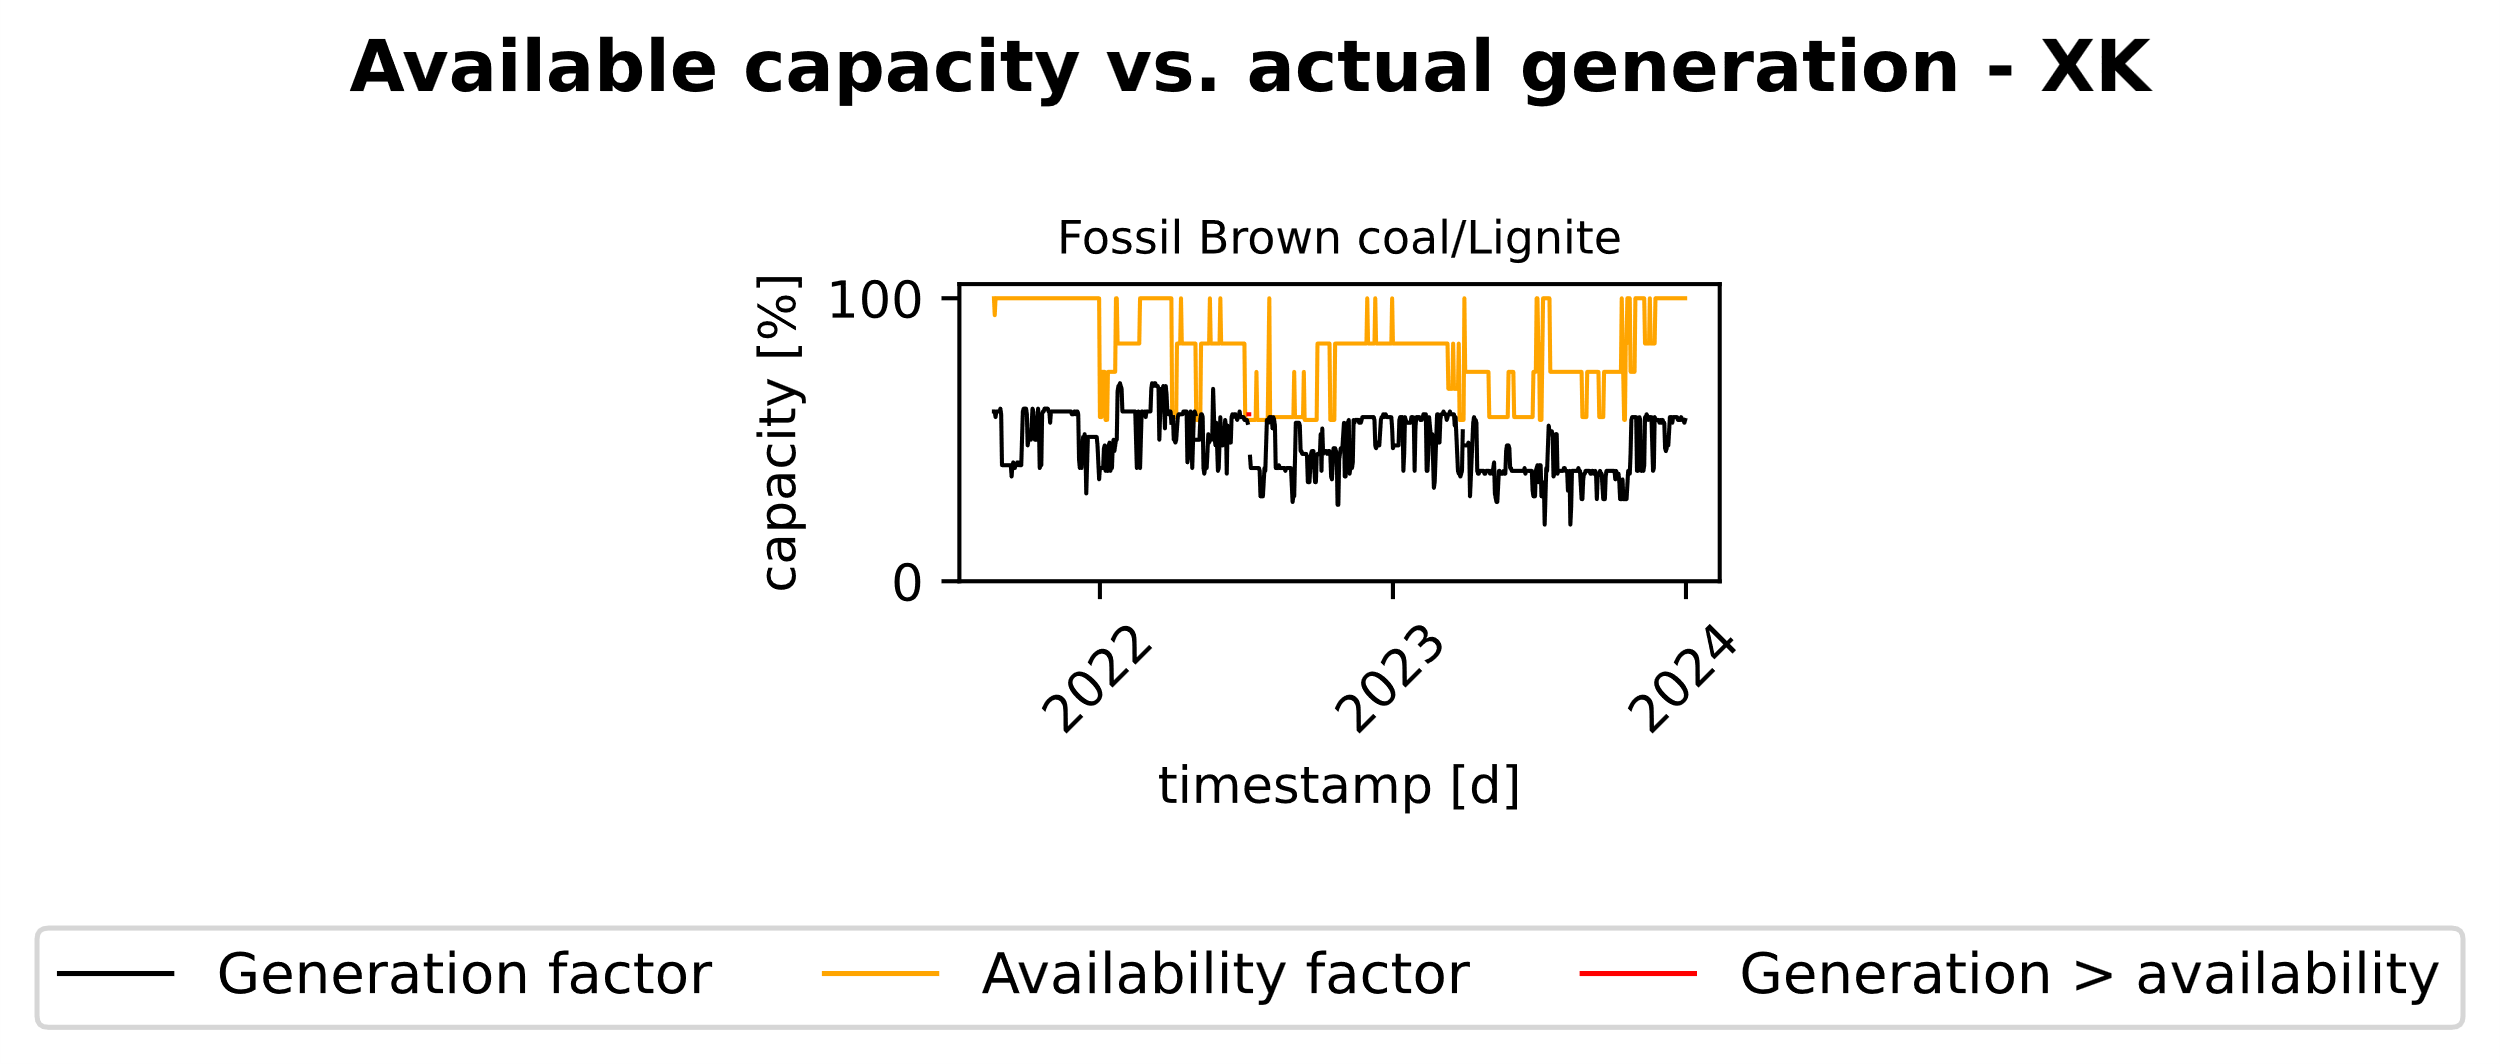


*Figure 41: Comparison of aggregated available capacity vs daily generation for Kosovo*

**Example algorithm for outages simulation**

This section describes two example algorithms for deriving simulation parameters for individual power plant units or aggregated at the technology level from the performance indicators in the data set, as well as the subsequent simulation of a time series of unplanned outages for a unit.

**Algorithm 1: Calibration of outage model parameters**

*Input:*

KPI table K with rows indexed by (c, g, m), where

c : country

g : technology / plant type

m : calendar month (1,…,12)

Columns in K:

FR_fo_h(c,g,m) -- forced-outage failure rate [events/hour]

FOD_h(c,g,m) -- mean forced-outage duration [hours/event]

mu_EFD_MW(c,g,m) -- capacity-weighted mean deration (wEFD_mw_mean) [MW]

sigma_EFD_MW(c,g,m) -- capacity-weighted std. dev. (wEFD_mw_std) [MW]

Unit fleet table U with rows indexed by units i, containing:

c(i), g(i) -- country/technology of unit i

P_i -- installed capacity P_i [MW]

Hyperparameters:

r_min ∈ (0, 1) -- minimum relative deration to count as event

r_sat ∈ (r_min, 1) -- saturation threshold for “full” outage

*Output:*

For each (c,g,m):

p_start_day(c,g,m) -- daily event start probability

α(c,g,m), β(c,g,m) -- Beta parameters for relative deration

*Steps:*

1: For each pair (c,g) do

2: Compute reference capacity C_ref(c,g) from U, e.g.

3: C_ref(c,g) ← mean of P_i over all units i with c(i)=c, g(i)=g

4: end for

5: For each triple (c,g,m) do

6: // (a) Daily start probability from failure rate

7: λ ← FR_fo_h(c,g,m) // events per hour

8: Λ_day ← 24 · λ // expected events per day

9: p_start_day(c,g,m) ← 1 − exp(−Λ_day) // Poisson(Λ_day) ⇒ P(N≥1)

10: // (b) Relative deration moments

11: μ_MW ← mu_EFD_MW(c,g,m)

12: σ_MW ← sigma_EFD_MW(c,g,m)

13: if C_ref(c,g) ≤ 0 or μ_MW or σ_MW are missing then

14: mark α(c,g,m), β(c,g,m) as undefined

15: continue to next (c,g,m)

16: end if

17: m_rel ← μ_MW / C_ref(c,g) // relative mean in (0,1)

18: s_rel ← σ_MW / C_ref(c,g) // relative std. deviation

19: v_rel ← s_rel² // relative variance

20: Clamp m_rel into (ε, 1−ε), e.g. ε = 10⁻⁶

21: v_max ← m_rel · (1 − m_rel) − ε // max feasible Beta variance

22: if v_rel > v_max then

23: v_rel ← v_max // enforce feasible variance

24: end if

25: // (c) Method-of-moments fit for Beta(α,β)

26: τ ← m_rel · (1 − m_rel) / v_rel − 1

27: if τ ≤ 0 then

28: mark α(c,g,m), β(c,g,m) as undefined

29: continue to next (c,g,m)

30: end if

31: α(c,g,m) ← m_rel · τ

32: β(c,g,m) ← (1 − m_rel) · τ

33: end for

**Algorithm 2: Outage simulation for single units**

*Input:*

Unit i:

country c(i), technology g(i), installed capacity P_i

Time horizon:

hourly grid {t_k}_{k=0,…,K−1}, with step size Δt = 1 hour

calendar mapping m(t_k) ∈ {1,…,12} (month of time t_k)

Parameters from Algorithm 1:

p_start_day(c,g,m) for all (c,g,m)

α(c,g,m), β(c,g,m) for all (c,g,m)

FOD_h(c,g,m) for all (c,g,m) // mean outage duration [h/event]

Hyperparameters:

r_min ∈ (0,1) -- minimum relative deration

r_sat ∈ (r_min,1) -- saturation threshold for “full” outage

duration_law -- e.g. "uniform" or "geometric"

V ∈ (0,1) -- shape parameter for duration_law

*Output:*

Hourly forced-outage profile FO_i(t_k) [MW], for k = 0,…,K−1

*Steps:*

1: Initialize hourly profile:

2: For all k = 0,…,K−1: FO_i(t_k) ← 0

3: Initialize state variables:

4: S ← UP // current state: UP or DOWN

5: Δ_rem ← 0 // remaining outage duration [hours]

6: A ← 0 // current outage magnitude [MW]

7: Partition the horizon into consecutive calendar days {d}.

8: For each day d with time interval [t_d_start, t_d_end) do

9: Let H_d be the set of hourly indices k with t_k ∈ [t_d_start, t_d_end)

10: Let m_d be the month such that m_d = m(t_k) for t_k in this day

11: // Case A: ongoing outage at day start

12: if S = DOWN and Δ_rem > 0 then

13: Δ_day ← min(Δ_rem, length of day in hours)

14: For all k ∈ H_d with t_k < t_d_start + Δ_day:

15: FO_i(t_k) ← A

16: Δ_rem ← Δ_rem − Δ_day

17: if Δ_rem = 0 then

18: S ← UP

19: end if

20: // If the outage ends within the day, the remaining part of the day

21: // is processed by Case B (unit available) below.

22: end if

23: // Case B: unit available at the current time within day d

24: if S = UP then

25: // (1) Decide whether a new event starts today

26: p_day ← p_start_day(c(i), g(i), m_d)

27: Draw B_d ∼ Bernoulli(p_day)

28: if B_d = 0 then

29: // no new event: remain UP, FO_i stays 0 for remaining hours

30: continue with next day d+1

31: end if

32: // (2) Draw event duration D [hours] with mean FOD_h

33: μ_D ← FOD_h(c(i), g(i), m_d)

34: if duration_law = "uniform" then

35: Choose d_min, d_max from μ_D and V

36: Draw D ∼ Uniform(d_min, d_max)

37: else if duration_law = "geometric" then

38: Choose parameters F, G from μ_D and V

39: Draw G_geom ∼ Geometric(p_geom)

40: Set D ← F + G_geom

41: end if

42: // (3) Draw relative deration R and magnitude A [MW]

43: α ← α(c(i), g(i), m_d)

44: β ← β(c(i), g(i), m_d)

45: if α, β are defined and α>0, β>0 then

46: Draw R ∼ Beta(α, β)

47: if R < r_min then

48: R_eff ← 0

49: else if R < r_sat then

50: R_eff ← R

51: else

52: R_eff ← 1

53: end if

54: else

55: R_eff ← 0

56: end if

57: A ← R_eff · P_i

58: // (4) Apply event over the current day

59: Δ_day ← min(D, length of day in hours)

60: For all k ∈ H_d with t_k < t_d_start + Δ_day:

61: FO_i(t_k) ← A

62: Δ_rem ← D − Δ_day

63: if Δ_rem > 0 then

64: S ← DOWN // outage continues into next day(s)

65: else

66: S ← UP // outage ends within the current day

67: end if

68: end if

69: end for

70: Return FO_i(t_k) for all k = 0,…,K−1

1. Since only power plants or their units with a rated capacity greater than or equal to 100 MW are published on the ENTSO-E Transparency Platform, many open-cycle gas turbines are not included. For this reason, they could not be matched with other open-source power plant lists, and the share of OCGTs is relatively low compared to CCGT units. [↑](#footnote-ref-1)
